# Supplementary material
Source: PubMed Central journal article supplement (PMC8900456)
Supplement: NIHMS1777530-supplement-Supporting_information.pdf [file NIHMS1777530-supplement-Supporting_information.pdf]

## **Supporting Information**

### **General and Robust Chemoenzymatic Method for Glycan-Mediated Site-Specific Labeling and Conjugation of Antibodies. Facile Synthesis of Homogeneous Antibody-Drug Conjugates**

Xiao Zhang, Chong Ou, Huiying Liu, Sunaina Kiran Prabhu, Chao Li, Qiang Yang, Lai-Xi Wang\*

Department of Chemistry and Biochemistry, University of Maryland, 8051 Regents Drive, College Park, Maryland 20742, United States.

\*Corresponding Author. Email: wang518@umd.edu

# Contents

|                                                            |     |
|------------------------------------------------------------|-----|
| 1. Chemical synthesis of disaccharide oxazolines .....     | S3  |
| 2. Screening of the transglycosylation conditions.....     | S17 |
| 3. LC-MS analysis of the transglycosylation reactions..... | S18 |
| 4. LC-MS analysis of homogenous ADCs .....                 | S26 |
| 5. References .....                                        | S32 |
| 6. NMR spectra .....                                       | S33 |

## 1. Chemical synthesis of disaccharide oxazolines.

### Materials and Methods.

All chemicals, reagents, and solvents were purchased from Sigma–Aldrich and TCI and unless specially noted applied in the reaction without further purification. TLC was performed using silica gel on glass plates (Sigma-Aldrich), and spots were detected under UV light (254 nm) then charring with 5 % (v/v) sulfuric acid in EtOH or cerium molybdate stain (CAM) followed by heating at 150 °C. Silica gel (200–425 mesh) for flash chromatography was purchased from Sigma-Aldrich. NMR spectra were recorded on a 400 MHz spectrometer (Bruker, Tokyo, Japan) with CDCl<sub>3</sub> or D<sub>2</sub>O as the solvent. The chemical shifts were assigned in ppm, and multiplicities are indicated by s (singlet), d (doublet), t (triplet), q (quartet), and m (multiplet). Coupling constants (J) are reported in Hertz. MALDI-TOF was performed on a Bruker Autoflex Speed Mass Spectrometer in positive reflectron mode with DHB (ACN/H<sub>2</sub>O = 1:1) as the matrix. HRMS was performed on an Exactive Plus Orbitrap Mass Spectrometer (Thermo Scientific) equipped with a C18 column. Preparative HPLC was performed with a Waters 600 HPLC instrument and Waters C18 columns (7.0 μm, 19 × 300 mm). The column was eluted with a suitable gradient of MeCN–H<sub>2</sub>O containing 0.1% FA at a flow rate of 10 mL/min. LC-MS analysis was performed on an Ultimate 3000 HPLC system coupled to an Exactive Plus Orbitrap mass spectrometer (Thermo Fischer Scientific) with C4 (whole antibody, gradient, 5–95% aq MeCN containing 0.1% FA for 6 min, 0.4 mL/min) or C8 (IdeS digestion, gradient, 25–35% aq MeCN containing 0.1% FA for 6 min, 0.4 mL/min, or 5–95% aq MeCN containing 0.1% FA for 6 min, 0.4 mL/min) column. Deconvolution data was transformed by MagTran software.

### Benzyl 2-*O*-benzyl-4,6-*O*-benzylidene-β-D-mannopyranosyl-(1→4)-2-azido-3,6-di-*O*-benzyl-2-deoxy-β-D-glucopyranoside (**2**).

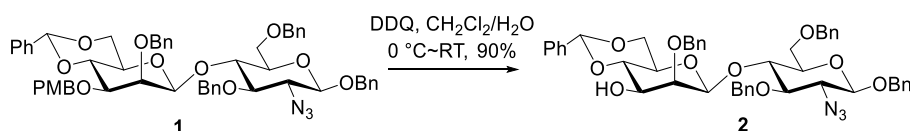

To a solution of **1** (454 mg, 0.485 mmol) in a mixture of CH<sub>2</sub>Cl<sub>2</sub>/H<sub>2</sub>O (15 mL/1 mL) was added DDQ (252 mg, 1.11 mmol) at 0 °C. After 30 min, the reaction mixture was warmed to room temperature and further stirred for 1 h. The reaction mixture was diluted with CH<sub>2</sub>Cl<sub>2</sub>, washed with saturated NaHCO<sub>3</sub> (aq.) and brine, and dried over Na<sub>2</sub>SO<sub>4</sub>. Concentration and purification by column chromatography on silica gel (hexanes/EtOAc = 6:1~3:1) provided **2** (356 mg, 90%) as a white amorphous solid. R<sub>f</sub> = 0.25 (hexanes/EtOAc = 3:1); Spectroscopic data were in agreement with literature values. <sup>11</sup> MALDI-TOF: [M + Na]<sup>+</sup> calcd for C<sub>47</sub>H<sub>49</sub>N<sub>3</sub>NaO<sub>10</sub><sup>+</sup>, 838.33; found, 838.47.

### Benzyl 2,4-di-*O*-benzyl-β-D-mannopyranosyl-(1→4)-2-azido-3,6-di-*O*-benzyl-2-deoxy-β-D-glucopyranoside (**3**)

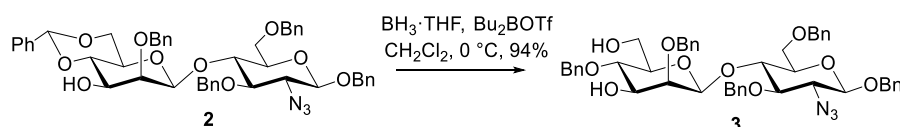

To a solution of compound **2** (197 mg, 0.242 mmol) in BH<sub>3</sub>·THF (1 M, 3.0 mL) was added a solution of Bu<sub>2</sub>BOTf in CH<sub>2</sub>Cl<sub>2</sub> (1 M, 483 μL) under argon atmosphere at 0 °C and the mixture was stirred at

0 °C for 40 min when TLC indicated the completion of the reaction. Et<sub>3</sub>N (250 μL) was added to the reaction followed by careful addition of MeOH (500 μL). The mixture was co-evaporated with MeOH three times and the residue was purified by flash chromatography (hexanes/EtOAc = 6:1~2:1) to afford **3** (186 mg, 94%) as a colorless syrup. *R<sub>f</sub>* = 0.30 (hexanes/EtOAc = 2:1); Spectroscopic data were in agreement with literature values. <sup>[1]</sup> MALDI-TOF: [M + Na]<sup>+</sup> calcd for C<sub>47</sub>H<sub>51</sub>N<sub>3</sub>NaO<sub>10</sub><sup>+</sup>, 840.35; found, 840.32.

**Benzyl 2,4-di-O-benzyl-β-D-mannopyranosyl-(1→4)-2-acetamido-3,6-di-O-benzyl-2-deoxy-β-D-glucopyranoside (4).**

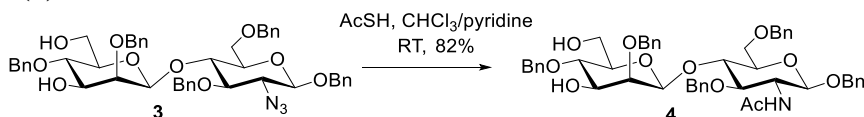

A solution of compound **3** (186.3 mg, 0.228 mmol) in a mixture of AcSH/pyridine/CHCl<sub>3</sub> (0.8 mL/0.6 mL/0.8 mL) was stirred at room temperature for 20 h. After the completion of the reaction as monitored by TLC, the resulting mixture was concentrated and subjected to flash chromatography on silica gel (hexanes/Acetone = 4:1~1:1) to afford compound **4** (154.8 mg, 82%) as colorless syrup. *R<sub>f</sub>* = 0.25 (hexanes/Acetone = 1:1); <sup>1</sup>H NMR (400 MHz, CDCl<sub>3</sub>) δ 7.36-7.28 (25H, m, Ar-H), 5.64 (1H, d, *J* = 7.7 Hz), 5.02-4.95 (3H, m), 4.92 (1H, d, PhCH<sub>2</sub>, *J* = 11.9 Hz), 4.86 (1H, d, PhCH<sub>2</sub>, *J* = 11.2 Hz), 4.68 (1H, d, PhCH<sub>2</sub>, *J* = 12.0 Hz), 4.65-4.57 (5H, m), 4.52 (1H, d, PhCH<sub>2</sub>, *J* = 12.0 Hz), 4.20 (1H, dd, *J* = 8.5 Hz, *J* = 8.5 Hz), 3.93 (1H, dd, *J* = 8.2 Hz, *J* = 8.2 Hz), 3.83-3.65 (5H, m), 3.56-3.44 (4H, m), 3.14 (1H, m), 2.33 (1H, d, *J* = 8.7 Hz), 1.98 (1H, m), 1.80 (3H, s); <sup>13</sup>C NMR (100 MHz, CDCl<sub>3</sub>) δ 170.52, 138.81, 138.27, 138.09, 137.69, 137.52, 128.59, 128.56, 128.45, 128.39, 128.01, 127.99, 127.96, 127.83, 127.51, 101.26, 98.97, 78.37, 78.12, 77.45, 77.24, 76.54, 75.29, 74.94, 74.69, 74.12, 74.03, 73.67, 70.86, 68.89, 62.23, 56.27, 29.71, 23.49. MALDI-TOF: [M + Na]<sup>+</sup> calcd for C<sub>49</sub>H<sub>55</sub>NNaO<sub>11</sub><sup>+</sup>, 856.37; found, 856.30.

**Benzyl 2,4-di-O-benzyl-3,6-bis-O-2-[2-(2-azidoethoxy)ethoxy]ethyl-β-D-mannopyranosyl-(1→4)-2-acetamido-3,6-di-O-benzyl-2-deoxy-β-D-glucopyranoside (5).**

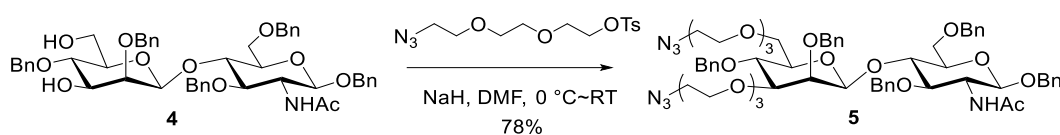

To a solution of compound **4** (79.0 mg, 0.095 mmol) and the tosylate linker <sup>[2]</sup> (125 mg, 0.379 mmol) in anhydrous DMF (3.0 mL) was added 60% sodium hydride (19.0 mg, 0.474 mmol) at 0 °C. After stirring for 0.5 hour at 0 °C then 7.5 hours at room temperature, MeOH (100 μL) and AcOH (25 μL) was added to the reaction mixture at 0 °C. The residual mixture was concentrated to dryness then purified by column chromatography on silica-gel (hexanes/Acetone = 3:1~2:1) to give compound **5** (84.9 mg, 78%) as a colorless syrup. *R<sub>f</sub>* = 0.20 (hexanes/Acetone = 2:1); <sup>1</sup>H NMR (400 MHz, CDCl<sub>3</sub>) δ 7.44-7.42 (2H, m, Ar-H), 7.36-7.26 (23H, m, Ar-H), 6.07 (1H, d, *J* = 8.2 Hz), 4.94-4.79 (6H, m), 4.69-4.65 (6H, m), 4.07 (1H, dd, *J* = 6.5 Hz, *J* = 6.5 Hz), 3.95 (1H, dd, *J* = 5.9 Hz, *J* = 5.9 Hz), 3.89 (1H, m), 3.86-3.80 (2H, m), 3.79-3.73 (3H, m), 3.66-3.53 (20H, m), 3.52-3.48 (2H, m), 3.32-3.29 (6H, m), 1.69 (3H, s); <sup>13</sup>C NMR (100 MHz, CDCl<sub>3</sub>) δ 170.12, 139.00, 138.73, 138.69, 138.05, 137.75, 128.47, 128.34, 128.32, 128.21, 128.18, 127.93, 127.87, 127.84, 127.76, 127.62, 127.59, 127.57, 127.33, 101.11, 99.52, 83.66, 75.73, 75.56, 75.25, 74.82, 74.57, 74.43, 73.50, 73.00, 70.90, 70.67,

70.60, 70.57, 70.50, 70.45, 70.42, 69.98, 69.91, 69.74, 69.59, 53.24, 50.63, 50.60, 23.12; MALDI-TOF:  $[M + Na]^+$  calcd for  $C_{61}H_{77}N_7NaO_{15}^+$ , 1170.54; found, 1170.70.

**3,6-bis-*O*-2-[2-(2-azidoethoxy)ethoxy]ethyl- $\beta$ -D-mannopyranosyl-(1 $\rightarrow$ 4)-2-acetamido-2-deoxy- $\beta$ -D-glucopyranoside (6).**

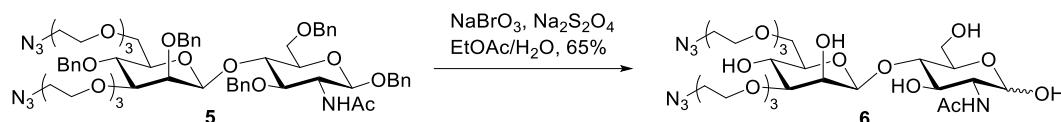

To a solution of compound **5** (83.7 mg, 0.073 mmol) in ethyl acetate (1.2 mL) was added a solution of  $NaBrO_3$  (167 mg, 1.09 mmol) in water (0.88 mL). A solution of  $Na_2S_2O_4$  (85 %, 194 mg, 0.95 mmol) in water (1.76 mL) was added over 10 min at 0 °C and the mixture was vigorously stirred for 5 h at room temperature. The mixture was quenched with saturated sodium thiosulphate and concentrated in vacuum. The residue was purified by flash chromatography ( $CH_2Cl_2/MeOH = 10:1 \sim CH_2Cl_2/MeOH/H_2O = 5:1:0.1$ ) then dissolved in water and lyophilized to afford compound **6** (26.8 mg, 73%) as white solid.  $R_f = 0.60$  ( $CHCl_3/MeOH/H_2O = 4:1:0.1$ );  $^1H$  NMR (400 MHz,  $D_2O$ )  $\delta$  5.13 (0.64H, d,  $J = 2.8$  Hz), 4.67 (1.08H, m), 4.65-4.63 (0.45H, m), 4.21 (1.05H, m), 3.89-3.78 (4.74H, m), 3.74-3.56 (25.7H, m), 3.68-3.46 (1.86H, m), 3.44-3.41 (5.10H, m), 1.97 (3H, s);  $^{13}C$  NMR (100 MHz,  $D_2O$ )  $\delta$  174.53, 174.28, 100.21, 100.18, 94.92, 90.53, 81.15, 79.72, 79.49, 74.68, 74.56, 72.37, 70.07, 69.98, 69.92, 69.63, 69.61, 69.53, 69.48, 69.21, 69.13, 68.21, 67.14, 65.78, 65.75, 60.14, 56.11, 53.71, 50.16, 50.13, 22.18, 21.88; HRMS:  $[M + H]^+$  calcd for  $C_{26}H_{48}N_7O_{15}^+$ , 698.3203; found, 698.3229.

**2-Methyl-{3,6-bis-*O*-2-[2-(2-azidoethoxy)ethoxy]ethyl- $\beta$ -D-mannopyranosyl-(1 $\rightarrow$ 4)-1,2-dideoxy- $\alpha$ -D-glucopyrano}-[2,1-*d*]-2-oxazoline (7).**

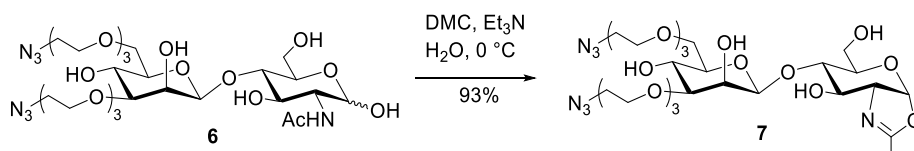

To a solution of compound **6** (5.3 mg, 7.6  $\mu$ mol) in  $H_2O$  (250  $\mu$ L) were added  $Et_3N$  (63.9  $\mu$ L) and 2-chloro-1,3-dimethylimidazolium chloride (DMC, 25.6 mg) at 0 °C. The reaction mixture was stirred at this temperature for 5 h then purified by gel filtration on a Sephadex G-10 column that was eluted with 0.1% aq  $Et_3N$  to afford compound **7** (4.8 mg, 93%) as white solid after lyophilization with 5 mol.% of  $NaOH$ .  $^1H$  NMR (400 MHz,  $D_2O$ )  $\delta$  5.99 (1H, d,  $J = 7.2$  Hz), 4.61-4.60 (1H, m), 4.28-4.26 (1H, m), 4.12-4.07 (2H, m), 3.82-3.77 (3H, m), 3.69-3.61 (24H, m), 3.57-3.55 (1H, m), 3.54-3.53 (1H, m), 3.42-3.39 (4H, m), 3.38-3.35 (1H, m), 3.33-3.29 (1H, m), 1.97 (3H, s);  $^{13}C$  NMR (100 MHz,  $D_2O$ )  $\delta$  168.16, 100.80, 99.50, 80.75, 77.26, 74.64, 70.53, 69.82, 69.68, 69.53, 69.22, 69.15, 69.09, 68.80, 68.78, 67.75, 66.65, 65.53, 64.86, 61.27, 49.78, 49.75, 12.56; HRMS:  $[M + H]^+$  calcd for  $C_{26}H_{46}N_7O_{14}^+$ , 680.3097; found, 680.3125.

**Benzyl 2,4-di-*O*-benzyl-3-*O*-*p*-methoxybenzyl- $\beta$ -D-mannopyranosyl-(1 $\rightarrow$ 4)-2-azido-3,6-di-*O*-benzyl-2-deoxy- $\beta$ -D-glucopyranoside (8)**

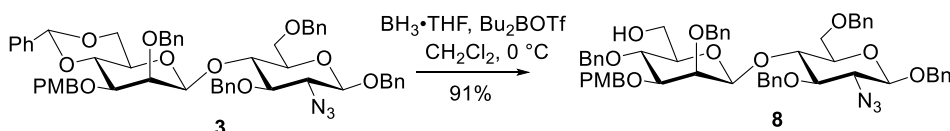

To a solution of compound **3** (300 mg, 0.321 mmol) in  $\text{BH}_3 \cdot \text{THF}$  (1 M, 4.0 mL) was added a solution of  $\text{Bu}_2\text{BOTf}$  in  $\text{CH}_2\text{Cl}_2$  (1 M, 642  $\mu\text{L}$ ) under argon atmosphere at 0 °C and the mixture was stirred at 0 °C for 40 min when TLC indicated the completion of the reaction.  $\text{Et}_3\text{N}$  (300  $\mu\text{L}$ ) was added to the reaction followed by careful addition of MeOH (600  $\mu\text{L}$ ). The mixture was co-evaporated with MeOH three times and the residue was purified by flash chromatography (hexanes/EtOAc = 5:1~2:1) to afford **8** (274 mg, 91%) as a colorless syrup.  $R_f = 0.30$  (hexanes/EtOAc = 3:1);  $^1\text{H NMR}$  (400 MHz,  $\text{CDCl}_3$ )  $\delta$  7.50-7.28 (27H, m, Ar-H), 6.93 (2H, m, Ar-H), 5.16 (1H, d,  $\text{PhCH}_2$ ,  $J = 10.8$  Hz), 5.01 (1H, d,  $\text{PhCH}_2$ ,  $J = 12.1$  Hz), 4.97-4.86 (3H, m,  $\text{PhCH}_2$ ), 4.78 (1H, d,  $\text{PhCH}_2$ ,  $J = 12.1$  Hz), 4.75-4.64 (3H, m,  $\text{PhCH}_2$ ), 4.55-4.52 (3H, m,  $\text{PhCH}_2$ ), 4.40 (1H, d,  $J = 8.1$  Hz), 4.01 (1H, dd,  $J = 9.3$  Hz,  $J = 9.3$  Hz), 3.89-3.75 (6H, m), 3.73-3.67 (2H, m), 3.57 (1H, dd,  $J = 8.2$  Hz,  $J = 8.2$  Hz), 3.45-3.39 (4H, m), 3.22-3.18 (1H, m), 1.97 (1H, s);  $^{13}\text{C NMR}$  (100 MHz,  $\text{CDCl}_3$ )  $\delta$  159.31, 138.76, 138.52, 138.47, 137.75, 136.93, 130.38, 129.20, 128.64, 128.56, 128.45, 128.38, 128.26, 128.17, 128.06, 128.03, 127.91, 127.78, 127.69, 127.65, 127.51, 113.89, 100.76, 100.51, 82.34, 81.50, 77.08, 75.80, 75.31, 75.10, 74.90, 74.83, 74.57, 73.71, 71.65, 70.93, 68.54, 65.96, 62.22, 55.34; MALDI-TOF:  $[\text{M} + \text{Na}]^+$  calcd for  $\text{C}_{55}\text{H}_{59}\text{N}_3\text{NaO}_{11}^+$ , 960.40; found, 959.98.

**Benzyl 2,4-di-O-benzyl-3-O-p-methoxybenzyl- $\beta$ -D-mannopyranosyl-(1 $\rightarrow$ 4)-2-acetamido-3,6-di-O-benzyl-2-deoxy- $\beta$ -D-glucopyranoside (**9**)**

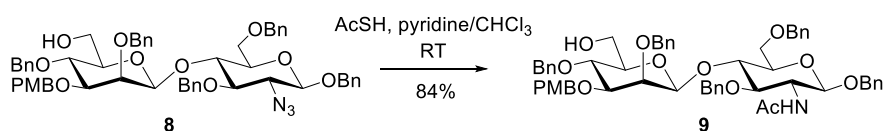

A solution of compound **8** (133.5 mg, 0.142 mmol) in a mixture of AcSH/pyridine/ $\text{CHCl}_3$  (0.8 mL/0.6 mL/0.8 mL) was stirred at room temperature for 18 h. After the completion of the reaction as monitored by TLC, the resulting mixture was concentrated and subjected to flash chromatography on silica gel (hexanes/EtOAc = 4:1~3:2) to afford compound **9** (113.8 mg, 84%) as colorless syrup.  $R_f = 0.30$  (hexanes/EtOAc = 2:1);  $^1\text{H NMR}$  (400 MHz,  $\text{CDCl}_3$ )  $\delta$  7.44-7.43 (2H, m, Ar-H), 7.37-7.23 (25H, m, Ar-H), 6.88-6.86 (2H, m, Ar-H), 5.75 (1H, d, NH,  $J = 8.0$  Hz), 4.98-4.81 (6H, m,  $\text{PhCH}_2$ ), 4.65-4.59 (4H, m,  $\text{PhCH}_2$ ), 4.53-4.47 (4H, m,  $\text{PhCH}_2$ ), 4.16 (1H, dd,  $J = 7.8$  Hz,  $J = 7.8$  Hz), 3.90 (1H, dd,  $J = 7.0$  Hz,  $J = 7.0$  Hz), 3.86-3.78 (6H, m), 3.73-3.69 (3H, m), 3.64-3.58 (1H, m), 3.53-3.48 (1H, m), 3.42-3.39 (1H, m), 3.22-3.18 (1H, m), 2.09 (1H, s), 1.76 (3H, s);  $^{13}\text{C NMR}$  (100 MHz,  $\text{CDCl}_3$ )  $\delta$  170.54, 159.25, 138.78, 138.63, 138.37, 137.91, 137.60, 130.28, 129.17, 128.51, 128.39, 128.33, 128.26, 128.15, 128.02, 127.88, 127.74, 127.66, 127.61, 127.54, 113.84, 101.08, 99.14, 82.18, 77.78, 75.71, 75.47, 75.13, 75.08, 74.76, 74.62, 73.75, 73.57, 71.59, 70.71, 69.38, 62.28, 55.29, 23.38; MALDI-TOF:  $[\text{M} + \text{Na}]^+$  calcd for  $\text{C}_{57}\text{H}_{63}\text{NNaO}_{12}^+$ , 976.42; found, 976.00.

**Benzyl 2,4-di-O-benzyl-3-O-p-methoxybenzyl-6-O-2-[2-(2-azidoethoxy)ethoxy]ethyl- $\beta$ -D-mannopyranosyl-(1 $\rightarrow$ 4)-2-acetamido-3,6-di-O-benzyl-2-deoxy- $\beta$ -D-glucopyranoside (**10**)**

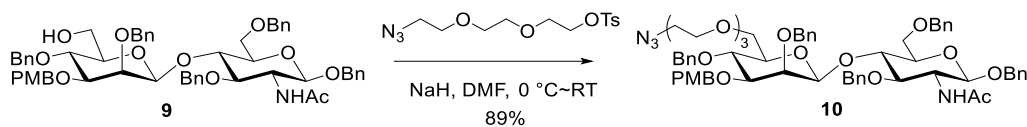

To a solution of compound **9** (88.0 mg, 0.092 mmol) and the tosylate linker <sup>[2]</sup> (76 mg, 0.231 mmol) in anhydrous DMF (2.4 mL) was added 60% sodium hydride (18.5 mg, 0.461 mmol) at 0 °C. After

stirring for 0.5 hour at 0 °C then 6 hours at room temperature, MeOH (100  $\mu$ L) and AcOH (25  $\mu$ L) was added to the reaction mixture at 0 °C. The residual mixture was concentrated to dryness then purified by column chromatography on silica-gel (hexanes/Acetone = 5:1~3:2) to give compound **10** (91.4 mg, 89%) as a colorless syrup.  $R_f$  = 0.20 (hexanes/Acetone = 2:1);  $^1\text{H}$  NMR (400 MHz,  $\text{CDCl}_3$ )  $\delta$  7.45-7.43 (2H, m, Ar-H), 7.37-7.23 (25H, m, Ar-H), 6.88-6.86 (2H, m, Ar-H), 6.06 (1H, d, NH,  $J$  = 8.0 Hz), 4.94-4.82 (6H, m), 4.71-4.61 (3H, m), 4.59-4.46 (5H, m), 4.09 (1H, dd,  $J$  = 6.7 Hz,  $J$  = 6.7 Hz), 3.96 (1H, dd,  $J$  = 6.2 Hz,  $J$  = 6.2 Hz), 3.90-3.73 (9H, m), 3.68-3.52 (12H, m), 3.43 (1H, dd,  $J$  = 2.8 Hz,  $J$  = 9.4 Hz), 3.35-3.29 (3H, m), 1.71 (3H, s);  $^{13}\text{C}$  NMR (100 MHz,  $\text{CDCl}_3$ )  $\delta$  170.14, 159.25, 139.01, 138.61, 138.58, 138.04, 137.75, 130.30, 129.22, 128.48, 128.37, 128.34, 128.24, 128.21, 128.00, 127.90, 127.83, 127.79, 127.67, 127.62, 127.36, 113.84, 101.27, 99.51, 82.17, 77.33, 77.25, 75.82, 75.47, 75.01, 74.62, 74.58, 73.50, 73.07, 71.65, 70.91, 70.61, 70.58, 70.52, 70.48, 70.40, 69.92, 69.76, 55.29, 53.42, 50.63, 23.16; MALDI-TOF:  $[\text{M} + \text{Na}]^+$  calcd for  $\text{C}_{63}\text{H}_{74}\text{N}_4\text{NaO}_{14}^+$ , 1133.51; found, 1133.15.

**6-O-2-[2-(2-azidoethoxy)ethoxy]ethyl- $\beta$ -D-mannopyranosyl-(1 $\rightarrow$ 4)-2-acetamido-2-deoxy- $\beta$ -D-glucopyranoside (**11**).**

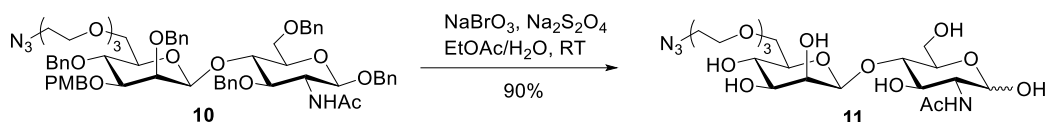

To a solution of compound **10** (25.0 mg, 0.0225 mmol) in ethyl acetate (0.4 mL) was added a solution of  $\text{NaBrO}_3$  (51.6 mg, 0.338 mmol) in water (0.25 mL). A solution of  $\text{Na}_2\text{S}_2\text{O}_4$  (85 %, 60.0 mg, 0.293 mmol) in water (0.50 mL) was added over 10 min at 0 °C and the mixture was vigorously stirred for 7 h at room temperature. The mixture was quenched with saturated sodium thiosulphate and concentrated in vacuum. The residue was purified by flash chromatography ( $\text{CH}_2\text{Cl}_2/\text{MeOH} = 10:1 \sim \text{CH}_2\text{Cl}_2/\text{MeOH}/\text{H}_2\text{O} = 2:1:0.1$ ) then dissolved in water and lyophilized to afford compound **11** (11.0 mg, 90%) as white solid.  $R_f$  = 0.30 ( $\text{CHCl}_3/\text{MeOH}/\text{H}_2\text{O} = 4:1:0.1$ );  $^1\text{H}$  NMR (400 MHz,  $\text{D}_2\text{O}$ )  $\delta$  5.13 (0.70H, d,  $J$  = 2.7 Hz), 4.65-4.63 (0.47H, m), 4.01-3.99 (1.08H, m), 3.90-3.85 (1.01H, m), 3.84-3.81 (1.98H, m), 3.81-3.78 (1.06H, m), 3.77-3.76 (0.26H, m), 3.75-3.71 (1.45H, m), 3.70-3.61 (14.3H, m), 3.61-3.56 (1.34H, m), 3.55 (0.37H, m), 3.53 (0.69H, m), 3.50-3.47 (1.57H, m), 3.45-3.42 (2.29H, m), 1.97 (3H, s);  $^{13}\text{C}$  NMR (100 MHz,  $\text{D}_2\text{O}$ )  $\delta$  174.53, 174.27, 100.26, 100.22, 94.91, 90.52, 79.70, 79.47, 74.78, 74.57, 72.74, 72.38, 70.51, 70.04, 69.99, 69.89, 69.84, 69.63, 69.61, 69.53, 69.21, 69.14, 66.68, 66.65, 60.29, 60.15, 56.12, 53.71, 50.16, 22.18, 21.88; HRMS:  $[\text{M} + \text{H}]^+$  calcd for  $\text{C}_{20}\text{H}_{37}\text{N}_4\text{O}_{13}^+$ , 541.2352; found, 541.2369.

**2-Methyl-[6-O-2-[2-(2-azidoethoxy)ethoxy]ethyl- $\beta$ -D-mannopyranosyl-(1 $\rightarrow$ 4)-1,2-dideoxy- $\alpha$ -D-glucopyrano]-[2,1-*d*]-2-oxazoline (**12**).**

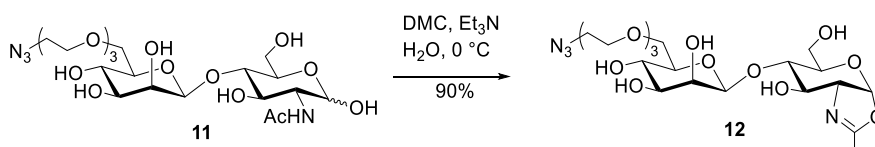

To a solution of compound **11** (7.5 mg, 13.8  $\mu$ mol) in  $\text{H}_2\text{O}$  (300  $\mu$ L) were added  $\text{Et}_3\text{N}$  (77.3  $\mu$ L) and 2-chloro-1,3-dimethylimidazolium chloride (DMC, 46.9 mg) at 0 °C. The reaction mixture was stirred at this temperature for 5 h then purified by gel filtration on a Sephadex G-10 column that was

eluted with 0.1% aq Et<sub>3</sub>N to afford compound **12** (6.5 mg, 90%) as white solid after lyophilization with 5 mol.% of NaOH. <sup>1</sup>H NMR (400 MHz, D<sub>2</sub>O) δ 6.00 (1H, d, *J* = 7.3 Hz), 4.64-4.63 (1H, m), 4.29-4.27 (1H, m), 4.12-4.09 (1H, m), 3.91-3.89 (1H, m), 3.84-3.76 (2H, m), 3.70-3.67 (4H, m), 3.66-3.63 (10H, m), 3.59-3.51 (3H, m), 3.49-3.47 (1H, m), 3.44-3.41 (3H, m), 3.35-3.31 (1H, m), 1.99 (3H, d, *J* = 1.7 Hz); <sup>13</sup>C NMR (100 MHz, D<sub>2</sub>O) δ 168.59, 101.23, 99.87, 77.53, 75.10, 72.73, 70.91, 70.39, 70.18, 70.06, 69.63, 69.61, 69.54, 69.45, 69.22, 66.80, 65.19, 61.68, 50.15, 12.96; HRMS: [M + H]<sup>+</sup> calcd for C<sub>20</sub>H<sub>35</sub>N<sub>4</sub>O<sub>12</sub><sup>+</sup>, 523.2246; found, 523.2267.

**Benzyl 2-*O*-benzyl-4,6-*O*-benzylidene-3-*O*-*p*-methoxybenzyl-β-D-mannopyranosyl-(1→4)-2-acetamido-3,6-di-*O*-benzyl-2-deoxy-β-D-glucopyranoside (13)**

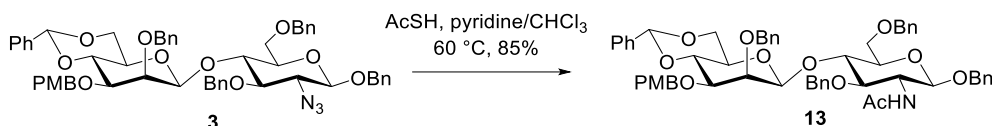

A solution of compound **3** (200.0 mg, 0.214 mmol) in a mixture of AcSH/pyridine/CHCl<sub>3</sub> (1.0 mL/0.8 mL/1.0 mL) was stirred at 60 °C for 18 h. After the completion of the reaction as monitored by TLC, the resulting mixture was concentrated and subjected to flash chromatography on silica gel (hexanes/EtOAc = 4:1~1:1) to afford compound **13** (170.0 mg, 85%) as colorless syrup. *R<sub>f</sub>* = 0.15 (hexanes/EtOAc = 2:1); <sup>1</sup>H NMR (400 MHz, CDCl<sub>3</sub>) δ 7.53-7.50 (2H, m, Ar-H), 7.44-7.25 (25H, m, Ar-H), 6.88-6.86 (2H, m, Ar-H), 5.87 (1H, d, *NH*, *J* = 8.0 Hz), 5.57 (1H, s, PhCH), 4.98-4.86 (4H, m, PhCH<sub>2</sub>), 4.82-4.79 (1H, d, *J* = 11.7 Hz, PhCH<sub>2</sub>), 4.71-4.68 (1H, d, *J* = 12.0 Hz, PhCH<sub>2</sub>), 4.63-4.55 (5H, m), 4.46-4.43 (1H, d, *J* = 12.0 Hz, PhCH<sub>2</sub>), 4.15-4.05 (3H, m), 3.94 (1H, dd, *J* = 7.1 Hz, *J* = 7.1 Hz), 3.84-3.76 (5H, m), 3.69-3.60 (4H, m), 3.48 (1H, dd, *J* = 2.9 Hz, *J* = 9.9 Hz), 3.20-3.14 (1H, m), 1.75 (3H, s); <sup>13</sup>C NMR (100 MHz, CDCl<sub>3</sub>) δ 170.33, 159.21, 149.48, 138.79, 138.38, 137.90, 137.59, 130.49, 129.15, 128.89, 128.50, 128.46, 128.37, 128.22, 128.20, 128.01, 127.91, 127.89, 127.75, 127.68, 127.51, 126.11, 123.87, 113.78, 101.81, 101.42, 99.25, 78.70, 78.01, 77.83, 77.27, 77.19, 75.29, 75.18, 73.67, 73.55, 72.36, 70.75, 69.31, 68.58, 67.34, 55.29, 23.25; MALDI-TOF: [M + Na]<sup>+</sup> calcd for C<sub>57</sub>H<sub>61</sub>NNaO<sub>12</sub><sup>+</sup>, 974.41; found, 974.07.

**Benzyl 2-*O*-benzyl-β-D-mannopyranosyl-(1→4)-2-acetamido-3,6-di-*O*-benzyl-2-deoxy-β-D-glucopyranoside (14)**

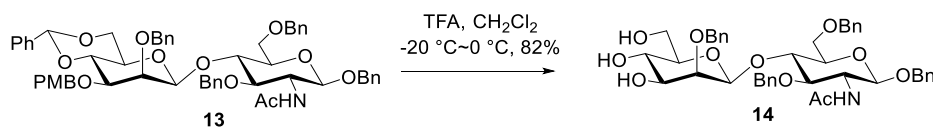

To a solution of compound **13** (148.5 mg, 0.156 mmol) in CH<sub>2</sub>Cl<sub>2</sub> (8.0 mL) was added Trifluoroacetic acid (1.5 mL) at -20 °C. After stirring at this temperature for 30 min, the reaction was warmed to 0 °C and stirred for further 1 hour. After the completion of the reaction as monitored by TLC, the reaction was quenched by MeOH (4 mL) at 0 °C and extracted by CH<sub>2</sub>Cl<sub>2</sub>, the residual mixture was concentrated to dryness then purified by column chromatography on silica-gel (hexanes/Acetone = 4:1~1:2) to give compound **14** (95.0 mg, 82%) as a colorless syrup. *R<sub>f</sub>* = 0.20 (hexanes/Acetone = 1:1); <sup>1</sup>H NMR (400 MHz, CDCl<sub>3</sub>) δ 7.38-7.24 (20H, m, Ar-H), 6.09 (1H, m, *NH*), 5.00-4.89 (4H, m, PhCH<sub>2</sub>), 4.68-4.50 (6H, m), 4.15 (1H, dd, *J* = 8.2 Hz, *J* = 8.2 Hz), 3.92 (1H, dd, *J* = 8.0 Hz, *J* = 8.0 Hz), 3.81-3.64 (4H, m), 3.60-3.59 (1H, m), 3.52-3.47 (4H, m), 3.25-3.20 (1H, m), 3.07-3.03 (1H, m), 2.84 (1H,



s), 2.35 (1H, s), 1.75 (3H, s);  $^{13}\text{C}$  NMR (100 MHz,  $\text{CDCl}_3$ )  $\delta$  170.77, 138.49, 138.18, 137.74, 137.52, 128.58, 128.48, 128.39, 128.34, 128.07, 128.00, 127.97, 127.81, 101.16, 99.08, 78.12, 77.82, 77.73, 77.31, 76.07, 75.31, 75.04, 74.34, 73.94, 73.63, 70.86, 68.99, 68.84, 62.22, 55.85, 29.30, 23.36; MALDI-TOF:  $[\text{M} + \text{Na}]^+$  calcd for  $\text{C}_{42}\text{H}_{49}\text{NNaO}_{11}^+$ , 766.32; found, 766.00.

**Benzyl 2-*O*-benzyl-3,4,6-tri-*O*-2-[2-(2-azidoethoxy)ethoxy]ethyl- $\beta$ -D-mannopyranosyl-(1 $\rightarrow$ 4)-2-acetamido-3,6-di-*O*-benzyl-2-deoxy- $\beta$ -D-glucopyranoside (15).**

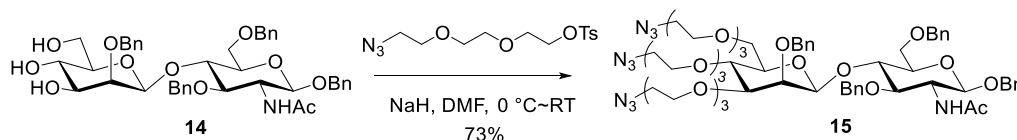

To a solution of compound **9** (84.0 mg, 0.113 mmol) and the tosylate linker <sup>[2]</sup> (205 mg, 0.623 mmol) in anhydrous DMF (3.2 mL) was added 60% sodium hydride (36.0 mg, 0.900 mmol) at 0 °C. After stirring for 0.5 hour at 0 °C then 10 hours at room temperature, MeOH (200  $\mu\text{L}$ ) and AcOH (40  $\mu\text{L}$ ) was added to the reaction mixture at 0 °C. The residual mixture was concentrated to dryness then purified by column chromatography on silica-gel (hexanes/Acetone = 4:1~1:1) to give compound **15** (99.7 mg, 73%) as a colorless syrup.  $R_f$  = 0.50 (hexanes/Acetone = 1:1);  $^1\text{H}$  NMR (400 MHz,  $\text{CDCl}_3$ )  $\delta$  7.41-7.23 (20H, m, Ar-H), 6.08 (1H, d,  $J$  = 8.4 Hz, NH), 4.91-4.76 (5H, m,  $\text{PhCH}_2$ ), 4.67-4.55 (3H, m), 4.49-4.46 (2H, m), 4.06-3.88 (4H, m), 3.82-3.71 (6H, m), 3.69-3.53 (30H, m), 3.51-3.48 (2H, m), 3.40-3.37 (2H, m), 3.34-3.32 (4H, m), 3.29-3.22 (2H, m), 1.68 (3H, s);  $^{13}\text{C}$  NMR (100 MHz,  $\text{CDCl}_3$ )  $\delta$  169.58, 138.50, 138.20, 137.56, 137.25, 127.94, 127.79, 127.66, 127.34, 127.30, 127.23, 127.07, 127.02, 126.80, 100.54, 99.02, 82.91, 76.50, 75.24, 75.04, 74.91, 74.64, 74.04, 72.96, 72.48, 71.51, 70.41, 70.35, 70.22, 70.19, 70.11, 70.05, 69.98, 69.94, 69.90, 69.79, 69.55, 69.50, 69.40, 69.22, 69.16, 52.69, 50.18, 50.13, 22.60; MALDI-TOF:  $[\text{M} + \text{Na}]^+$  calcd for  $\text{C}_{60}\text{H}_{82}\text{N}_{10}\text{NaO}_{17}^+$ , 1237.58; found, 1237.46.

**3,4,6-tri-*O*-2-[2-(2-azidoethoxy)ethoxy]ethyl- $\beta$ -D-mannopyranosyl-(1 $\rightarrow$ 4)-2-acetamido-2-deoxy- $\beta$ -D-glucopyranoside (16).**

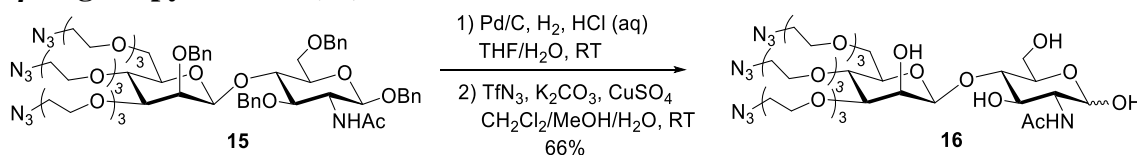

A mixture of compound **15** (99.7 mg, 0.082 mmol) and Pd/C (10 wt.% loading, 40 mg) in THF (4.5 mL) and  $\text{H}_2\text{O}$  (1.5 mL) was added 2 M HCl (aq, 205  $\mu\text{L}$ , 5 eq), then stirred under  $\text{H}_2$  atmosphere overnight. After LC-MS analysis showed the complete conversion to free amine intermediate, the reaction mixture was filtered through a Celite pad, then concentrated to dryness. To the solution of the residue in  $\text{H}_2\text{O}$  (3.0 mL) was added freshly prepared solution of  $\text{TfN}_3$  <sup>[3]</sup> in  $\text{CH}_2\text{Cl}_2$  (4.0 mL, 1.23 mmol),  $\text{K}_2\text{CO}_3$  (92 mg) and  $\text{CuSO}_4$  (10 mg) at 0 °C, then MeOH was added to make the solution homogenous, and the mixture was stirred at room temperature for 24 h. The reaction mixture was filtered, then concentrated to dryness and purified on a Sephadex LH-20 column by elution with  $\text{H}_2\text{O}$ . Fractions containing the product were pooled and lyophilized, then further purified by preparative RP-HPLC (gradient, 20–35% aq MeCN containing 0.1% FA for 40 min; flow rate, 10.0 mL/min) to give compound **16** (46.2 mg, 66%) as white solid.  $^1\text{H}$  NMR (400 MHz,  $\text{D}_2\text{O}$ )  $\delta$  5.10 (0.56H, d,  $J$  = 3.0 Hz), 4.63 (0.84H, m), 4.62-4.59 (0.54H, m), 4.17-4.15 (1.12H, m), 3.92-3.88 (1.66H, m), 3.87-3.83 (1.76H,

m), 3.81-3.75 (5.13H, m), 3.69-3.58 (33.19H, m), 3.50-3.45 (4.06H, m), 3.43-3.39 (6.41H, m), 3.55 (0.37H, m), 3.53 (0.69H, m), 3.50-3.47 (1.57H, m), 3.45-3.42 (2.29H, m), 1.96-1.94 (3H, m);  $^{13}\text{C}$  NMR (100 MHz,  $\text{D}_2\text{O}$ )  $\delta$  174.07, 173.81, 99.68, 99.65, 94.47, 90.08, 81.00, 79.21, 78.97, 74.12, 74.03, 73.99, 73.33, 71.89, 71.18, 69.59, 69.56, 69.24, 69.19, 69.17, 69.13, 68.82, 68.78, 68.66, 68.04, 67.13, 59.83, 59.70, 55.68, 53.26, 49.73, 49.71, 21.73, 21.44; HRMS:  $[\text{M} + \text{H}]^+$  calcd for  $\text{C}_{32}\text{H}_{59}\text{N}_{10}\text{O}_{17}^+$ , 855.4054; found, 855.4088.

### 2-Methyl-{3,4,6-tri-*O*-2-[2-(2-azidoethoxy)ethoxy]ethyl- $\beta$ -D-mannopyranosyl-(1 $\rightarrow$ 4)-1,2-dideoxy- $\alpha$ -D-glucopyrano}-[2,1-*d*]-2-oxazoline (17).

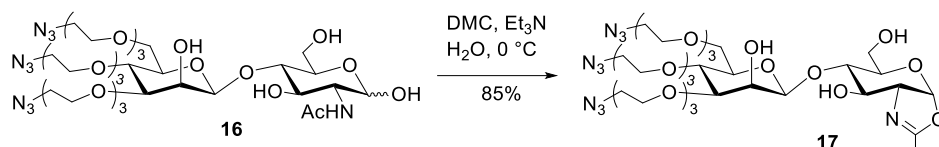

To a solution of compound **16** (3.0 mg, 3.5  $\mu\text{mol}$ ) in  $\text{H}_2\text{O}$  (250  $\mu\text{L}$ ) were added  $\text{Et}_3\text{N}$  (29.5  $\mu\text{L}$ ) and 2-chloro-1,3-dimethylimidazolium chloride (DMC, 11.9 mg) at 0  $^\circ\text{C}$ . The reaction mixture was stirred at this temperature for 8 h then purified by gel filtration on a Sephadex G-10 column that was eluted with 0.1% aq  $\text{Et}_3\text{N}$  to afford compound **17** (2.5 mg, 85%) as colorless oil after lyophilization with 5 mol.% of  $\text{NaOH}$ .  $^1\text{H}$  NMR (400 MHz,  $\text{D}_2\text{O}$ )  $\delta$  6.01 (1H, d,  $J = 7.3$  Hz), 4.61-4.60 (1H, m), 4.30-4.29 (1H, m), 4.13-4.10 (2H, m), 3.96-3.91 (2H, m), 3.83-3.77 (3H, m), 3.69-3.61 (35H, m), 3.46-3.41 (11H, m), 3.36-3.31 (1H, m), 1.99 (3H, d,  $J = 1.7$  Hz);  $^{13}\text{C}$  NMR (100 MHz,  $\text{D}_2\text{O}$ )  $\delta$  168.16, 100.75, 99.49, 81.06, 77.26, 74.23, 73.72, 71.20, 70.52, 69.78, 69.65, 69.63, 69.33, 69.29, 69.23, 69.20, 69.16, 69.03, 68.86, 68.83, 68.03, 67.08, 64.85, 61.28, 46.13, 12.56; HRMS:  $[\text{M} + \text{H}]^+$  calcd for  $\text{C}_{32}\text{H}_{57}\text{N}_{10}\text{O}_{16}^+$ , 837.3949; found, 837.3981.

### Synthesis of scaffold (22).

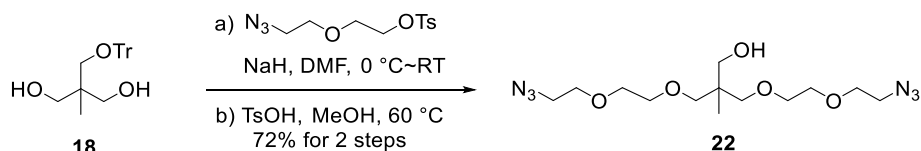

To a solution of compound **18** <sup>[4]</sup> (400 mg, 1.10 mmol) and the tosylate linker <sup>[5]</sup> (944 mg, 3.30 mmol) in anhydrous DMF (5.0 mL) was added 60% sodium hydride (198 mg, 4.95 mmol) at 0  $^\circ\text{C}$ . After stirring overnight at room temperature,  $\text{MeOH}$  (200  $\mu\text{L}$ ) was added at 0  $^\circ\text{C}$  to quench the reaction. The residual mixture was diluted with  $\text{CH}_2\text{Cl}_2$ , washed with saturated  $\text{NH}_4\text{Cl}$  (aq.) and brine, dried over  $\text{Na}_2\text{SO}_4$  and concentrated to obtain the crude product. To the solution of the crude product in  $\text{MeOH}$  (10 mL) was added  $\text{TsOH}\cdot\text{H}_2\text{O}$  (62.7 mg, 0.33 mmol), and the reaction was heated to 60  $^\circ\text{C}$  and stirred for 2 h. After the completion of the reaction as monitored by TLC, the reaction was concentrated to dryness then purified by column chromatography on silica-gel (hexanes/ $\text{EtOAc}$  = 4:1~1:1) to give compound **22** (272 mg, 72%) as a colorless syrup.  $R_f = 0.20$  (hexanes/ $\text{EtOAc}$  = 2:1);  $^1\text{H}$  NMR (400 MHz,  $\text{CDCl}_3$ )  $\delta$  3.69-3.60 (12H, m), 3.58-3.55 (2H, m), 3.51-3.49 (2H, m), 3.45-3.43 (2H, m), 3.40-3.37 (4H, m), 3.04-3.01 (1H, m), 0.88 (3H, s);  $^{13}\text{C}$  NMR (100 MHz,  $\text{CDCl}_3$ )  $\delta$  75.66, 71.00, 70.46, 70.05, 68.90, 50.76, 40.70, 17.45; ESI-TOF (positive mode):  $[\text{M} + \text{Na}]^+$  calcd for  $\text{C}_{13}\text{H}_{26}\text{N}_6\text{NaO}_5^+$ , 369.19; found, 369.06.

### Synthesis of scaffold (23).

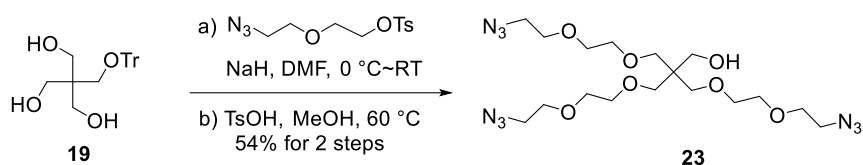

To a solution of compound **19** [6] (400 mg, 1.06 mmol) and the tosylate linker [5] (1.21 g, 4.24 mmol) in anhydrous DMF (5.0 mL) was added 60% sodium hydride (212 mg, 5.30 mmol) at 0 °C. After stirring overnight at room temperature, MeOH (250  $\mu\text{L}$ ) was added at 0 °C to quench the reaction. The residual mixture was diluted with  $\text{CH}_2\text{Cl}_2$ , washed with saturated  $\text{NH}_4\text{Cl}$  (aq.) and brine, dried over  $\text{Na}_2\text{SO}_4$  and concentrated to obtain the crude product. To the solution of the crude product in MeOH (10 mL) was added  $\text{TsOH}\cdot\text{H}_2\text{O}$  (61.0 mg, 0.32 mmol), and the reaction was heated to 60 °C and stirred for 2 h. After the completion of the reaction as monitored by TLC, the reaction was concentrated to dryness then purified by column chromatography on silica-gel (hexanes/EtOAc = 4:1~1:2) to give compound **23** (270 mg, 54%) as a colorless syrup.  $R_f = 0.20$  (hexanes/EtOAc = 1:1);  $^1\text{H NMR}$  (400 MHz,  $\text{CDCl}_3$ )  $\delta$  3.69-3.61 (20H, m), 3.54-3.52 (6H, m), 3.40-3.38 (6H, m), 3.06-3.03 (1H, m);  $^{13}\text{C NMR}$  (100 MHz,  $\text{CDCl}_3$ )  $\delta$  71.62, 71.01, 70.41, 70.03, 65.59, 50.77, 45.10; MALDI-TOF:  $[\text{M} + \text{Na}]^+$  calcd for  $\text{C}_{17}\text{H}_{33}\text{N}_9\text{NaO}_7^+$ , 498.24; found, 498.10.

#### Synthesis of scaffold (24).

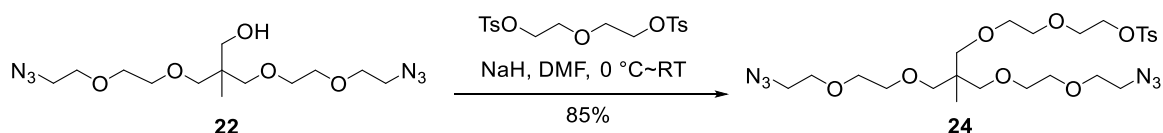

To a solution of compound **22** (294 mg, 0.850 mmol) and the tosylate linker [7] (1.76 g, 4.25 mmol) in anhydrous DMF (10.0 mL) was added 60% sodium hydride (170 mg, 4.25 mmol) at 0 °C. After stirring overnight at room temperature, MeOH (200  $\mu\text{L}$ ) was added at 0 °C to quench the reaction. The residual mixture was diluted with  $\text{CH}_2\text{Cl}_2$ , washed with saturated  $\text{NH}_4\text{Cl}$  (aq.) and brine, dried over  $\text{Na}_2\text{SO}_4$  and concentrated, then purified by column chromatography on silica-gel ( $\text{CH}_2\text{Cl}_2$ , then hexanes/Acetone = 2:1~1:1) to give compound **24** (426 mg, 85%) as a colorless syrup.  $R_f = 0.50$  (hexanes/Acetone = 2:1);  $^1\text{H NMR}$  (400 MHz,  $\text{CDCl}_3$ )  $\delta$  7.82-7.80 (2H, m, Ar-H), 7.37-7.34 (2H, m, Ar-H), 4.17-4.15 (2H, m), 3.72-3.67 (6H, m), 3.65-3.63 (4H, m), 3.59-3.55 (6H, m), 3.52-3.50 (2H, m), 3.39-3.37 (4H, m), 3.33-3.30 (6H, m), 2.46 (3H, s), 0.94 (3H, s);  $^{13}\text{C NMR}$  (100 MHz,  $\text{CDCl}_3$ )  $\delta$  144.79, 133.05, 129.83, 127.97, 73.89, 73.84, 71.09, 71.03, 70.58, 70.55, 70.03, 69.34, 68.69, 50.81, 40.99, 21.64, 17.34; MALDI-TOF:  $[\text{M} + \text{Na}]^+$  calcd for  $\text{C}_{24}\text{H}_{40}\text{N}_6\text{NaO}_9\text{S}^+$ , 611.25; found, 611.04.

#### Synthesis of scaffold (25).

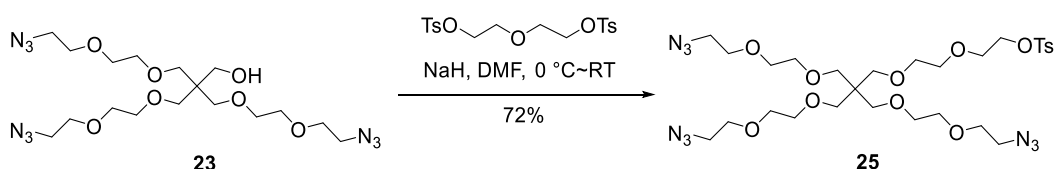

To a solution of compound **23** (250 mg, 0.526 mmol) and the tosylate linker [7] (1.09 g, 2.63 mmol) in anhydrous DMF (7.0 mL) was added 60% sodium hydride (105 mg, 2.63 mmol) at 0 °C. After stirring overnight at room temperature, MeOH (200  $\mu\text{L}$ ) was added at 0 °C to quench the reaction. The residual mixture was diluted with  $\text{CH}_2\text{Cl}_2$ , washed with saturated  $\text{NH}_4\text{Cl}$  (aq.) and brine, dried over  $\text{Na}_2\text{SO}_4$

and concentrated, then purified by column chromatography on silica-gel (CH<sub>2</sub>Cl<sub>2</sub>, then hexanes/Acetone = 4:1~1:1) to give compound **25** (272 mg, 72%) as a colorless syrup. *R<sub>f</sub>* = 0.40 (hexanes/EtOAc = 1:1); <sup>1</sup>H NMR (400 MHz, CDCl<sub>3</sub>) δ 7.82-7.80 (2H, m, Ar-H), 7.37-7.35 (2H, m, Ar-H), 4.16-4.14 (2H, m), 3.71-3.66 (9H, m), 3.64-3.62 (7H, m), 3.59-3.55 (8H, m), 3.52-3.50 (2H, m), 3.48-3.42 (8H, m), 3.39-3.36 (6H, m), 2.46 (3H, s); <sup>13</sup>C NMR (100 MHz, CDCl<sub>3</sub>) δ 144.80, 133.05, 129.83, 127.97, 71.03, 70.98, 70.50, 69.99, 69.34, 68.66, 50.80, 45.54, 21.63; MALDI-TOF: [M + Na]<sup>+</sup> calcd for C<sub>28</sub>H<sub>47</sub>N<sub>9</sub>NaO<sub>11</sub>S<sup>+</sup>, 740.30; found, 740.02.

### Synthesis of compound (26).

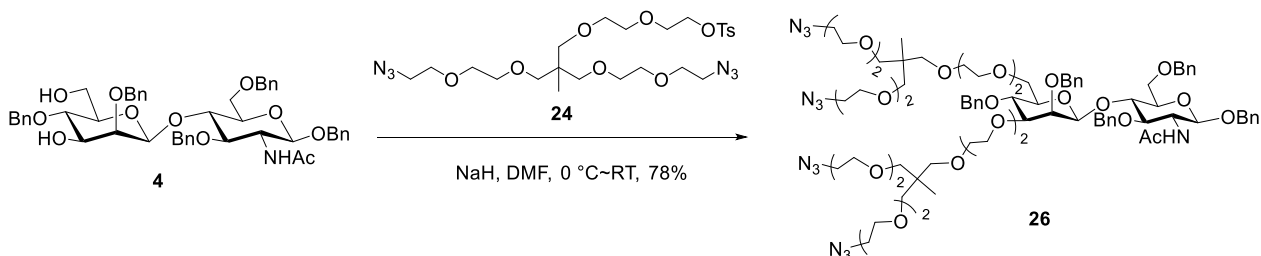

To a solution of compound **4** (40.0 mg, 0.048 mmol) and scaffold **24** (113 mg, 0.192 mmol) in anhydrous DMF (1.5 mL) was added 60% sodium hydride (15.4 mg, 0.384 mmol) at 0 °C. After stirring for 0.5 hour at 0 °C then 11 hours at room temperature, MeOH (200 μL) was added at 0 °C to quench the reaction. The residual mixture was diluted with CH<sub>2</sub>Cl<sub>2</sub>, washed with brine, dried over Na<sub>2</sub>SO<sub>4</sub> and concentrated, then purified by column chromatography on silica-gel (hexanes/Acetone = 4:1~3:2) to give compound **26** (62.4 mg, 78%) as a colorless syrup. *R<sub>f</sub>* = 0.30 (hexanes/Acetone = 2:1); <sup>1</sup>H NMR (400 MHz, CDCl<sub>3</sub>) δ 7.44-7.24 (25H, m, Ar-H), 6.11 (1H, d, *J* = 8.3 Hz, NH), 4.92-4.78 (6H, m, PhCH<sub>2</sub>), 4.69-4.45 (6H, m), 4.07 (1H, dd, *J* = 6.5 Hz, *J* = 6.5 Hz), 3.95-3.87 (2H, m), 3.83-3.80 (2H, m), 3.80-3.72 (3H, m), 3.70-3.47 (42H, m), 3.40-3.26 (22H, m), 1.69 (3H, s), 0.95 (3H, s), 0.94 (3H, s); <sup>13</sup>C NMR (100 MHz, CDCl<sub>3</sub>) δ 170.11, 138.97, 138.69, 138.64, 138.04, 137.75, 128.46, 128.34, 128.31, 128.27, 128.18, 128.01, 127.89, 127.84, 127.76, 127.61, 127.58, 127.56, 127.33, 101.09, 99.51, 83.71, 77.29, 75.72, 75.56, 75.18, 74.84, 74.54, 74.44, 73.95, 73.91, 73.86, 73.47, 73.00, 71.09, 70.91, 70.80, 70.55, 70.53, 70.47, 70.24, 70.04, 70.03, 69.75, 69.65, 53.19, 50.79, 41.01, 41.00, 23.11, 17.35; MALDI-TOF: [M + Na]<sup>+</sup> calcd for C<sub>83</sub>H<sub>119</sub>N<sub>13</sub>NaO<sub>23</sub><sup>+</sup>, 1688.84; found, 1688.35.

### Synthesis of compound (27).

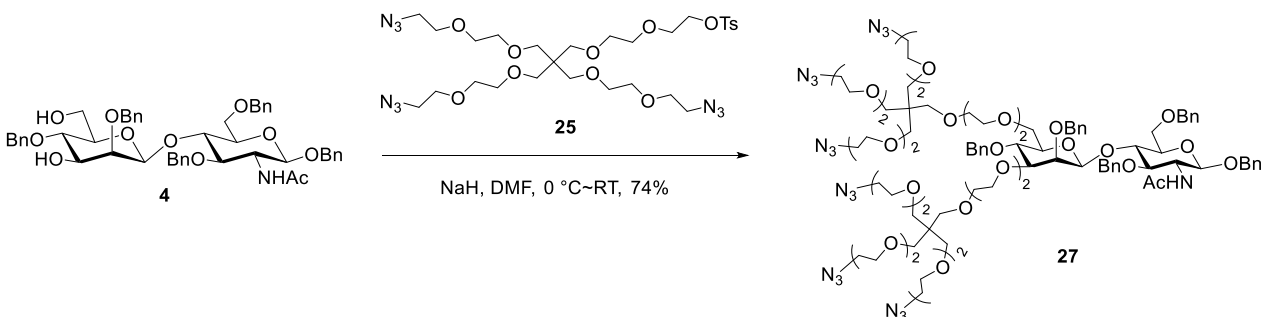

To a solution of compound **4** (35.0 mg, 0.042 mmol) and scaffold **25** (122 mg, 0.170 mmol) in anhydrous DMF (1.3 mL) was added 60% sodium hydride (13.4 mg, 0.335 mmol) at 0 °C. After stirring for 0.5 hour at 0 °C then 11 hours at room temperature, MeOH (200 μL) was added at 0 °C to quench the reaction. The residual mixture was diluted with CH<sub>2</sub>Cl<sub>2</sub>, washed with brine, dried over

Na<sub>2</sub>SO<sub>4</sub> and concentrated, then purified by column chromatography on silica-gel (hexanes/Acetone = 6:1~3:2) to give compound **27** (60.0 mg, 74%) as a colorless syrup. *R<sub>f</sub>* = 0.30 (hexanes/Acetone = 2:1); <sup>1</sup>H NMR (400 MHz, CDCl<sub>3</sub>) δ 7.43-7.41 (2H, m, Ar-H), 7.37-7.24 (23H, m, Ar-H), 6.12 (1H, d, *J* = 8.4 Hz, *NH*), 4.92-4.78 (6H, m, PhCH<sub>2</sub>), 4.67-4.45 (6H, m), 4.07 (1H, dd, *J* = 6.6 Hz, *J* = 6.6 Hz), 3.93 (1H, dd, *J* = 6.1 Hz, *J* = 6.1 Hz), 3.88-3.85 (1H, m), 3.84-3.78 (2H, m), 3.78-3.70 (4H, m), 3.68-3.64 (13H, m), 3.64-3.59 (18H, m), 3.57-3.51 (18H, m), 3.50-3.43 (20H, m), 3.42 (2H, m), 3.38-3.33 (12H, m), 3.32-3.26 (2H, m), 1.69 (3H, s); <sup>13</sup>C NMR (100 MHz, CDCl<sub>3</sub>) δ 170.12, 138.98, 138.68, 138.64, 138.04, 137.74, 128.46, 128.34, 128.31, 128.26, 128.17, 128.00, 127.94, 127.90, 127.84, 127.76, 127.62, 127.59, 127.56, 127.33, 101.06, 99.49, 83.70, 75.72, 75.52, 75.17, 74.82, 74.54, 74.44, 73.47, 73.05, 71.03, 70.98, 70.87, 70.85, 70.73, 70.49, 70.47, 70.41, 70.19, 70.06, 70.04, 69.99, 69.98, 69.71, 69.60, 53.34, 50.79, 45.55, 45.53, 23.11; MALDI-TOF: [M + Na]<sup>+</sup> calcd for C<sub>91</sub>H<sub>133</sub>N<sub>19</sub>NaO<sub>27</sub><sup>+</sup>, 1946.95; found, 1947.43.

### Synthesis of compound (28).

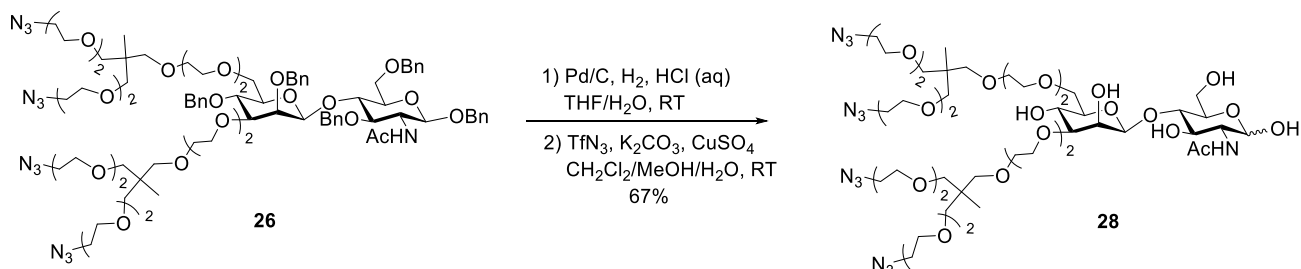

A mixture of compound **26** (70.0 mg, 0.042 mmol) and Pd/C (10 wt.% loading, 35 mg) in THF (3.0 mL) and H<sub>2</sub>O (1.0 mL) was added 2 M HCl (aq, 168 μL, 8 eq), then stirred under H<sub>2</sub> atmosphere overnight. After LC-MS analysis showed the complete conversion to free amine intermediate, the reaction mixture was filtered through a Celite pad, then concentrated to dryness. To the solution of the residue in H<sub>2</sub>O (2.0 mL) was added freshly prepared solution of TfN<sub>3</sub> in CH<sub>2</sub>Cl<sub>2</sub> (2.0 mL, 1.68 mmol), K<sub>2</sub>CO<sub>3</sub> (62 mg) and CuSO<sub>4</sub> (7.2 mg) at 0 °C, then MeOH was added to make the solution homogenous, and the mixture was stirred at room temperature for 48 h. The reaction mixture was filtered, then concentrated to dryness and purified on a Sephadex LH-20 column by elution with H<sub>2</sub>O. Fractions containing the product were pooled and lyophilized, then further purified by preparative RP-HPLC (gradient, 40–80% aq MeCN containing 0.1% FA for 40 min; flow rate, 10.0 mL/min) to give compound **28** (34.1 mg, 67%) as thick oil. <sup>1</sup>H NMR (400 MHz, D<sub>2</sub>O) δ 5.13 (0.75H, d, *J* = 2.8 Hz), 4.68-4.65 (1.06H, m), 4.22-4.19 (1.07H, m), 3.89-3.75 (6.04H, m), 3.74-3.56 (47.07H, m), 3.52-3.34 (24.04H, m), 1.97 (3H, s), 0.88 (6H, m); <sup>13</sup>C NMR (100 MHz, D<sub>2</sub>O) δ 174.22, 100.21, 94.92, 90.52, 81.21, 79.74, 79.52, 74.71, 74.57, 73.53, 72.37, 70.51, 70.15, 69.98, 69.94, 69.58, 69.30, 69.13, 68.22, 67.15, 65.78, 60.16, 56.12, 53.72, 50.26, 40.46, 22.21, 21.92, 16.84, 16.83; HRMS: [M + H]<sup>+</sup> calcd for C<sub>48</sub>H<sub>90</sub>N<sub>13</sub>O<sub>23</sub><sup>+</sup>, 1216.6267; found, 1216.6316.

### Synthesis of compound (29).

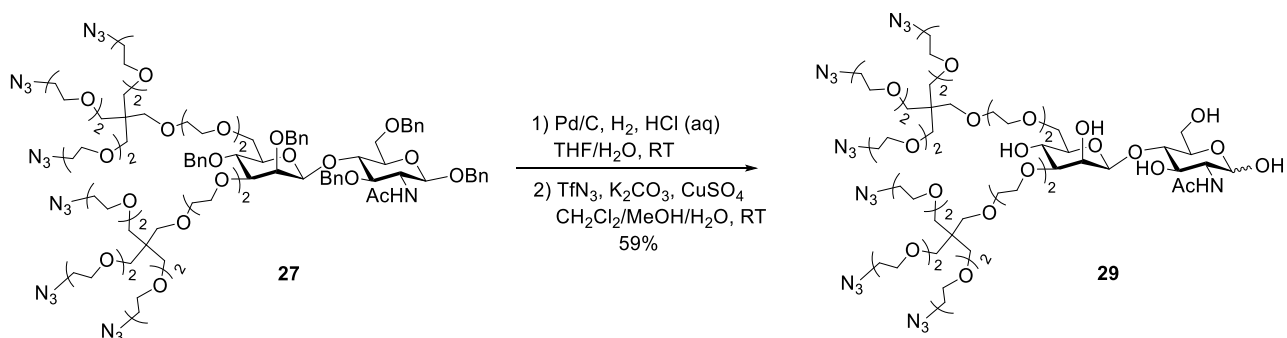

A mixture of compound **27** (50.0 mg, 0.026 mmol) and Pd/C (10 wt.% loading, 20 mg) in THF (3.0 mL) and H<sub>2</sub>O (1.0 mL) was added 2 M HCl (aq, 105  $\mu$ L, 10 eq), then stirred under H<sub>2</sub> atmosphere overnight. After LC-MS analysis showed the complete conversion to free amine intermediate, the reaction mixture was filtered through a Celite pad, then concentrated to dryness. To the solution of the residue in H<sub>2</sub>O (2.0 mL) was added freshly prepared solution of TfN<sub>3</sub> in CH<sub>2</sub>Cl<sub>2</sub> (3.0 mL, 1.56 mmol), K<sub>2</sub>CO<sub>3</sub> (60 mg) and CuSO<sub>4</sub> (10 mg) at 0 °C, then MeOH was added to make the solution homogenous, and the mixture was stirred at room temperature for 48 h. The reaction mixture was filtered, then concentrated to dryness and purified on a Sephadex LH-20 column by elution with H<sub>2</sub>O. Fractions containing the product were pooled and lyophilized, then further purified by preparative RP-HPLC (gradient, 40–80% aq MeCN containing 0.1% FA for 40 min; flow rate, 10.0 mL/min) to give compound **29** (22.5 mg, 59%) as thick oil. <sup>1</sup>H NMR (400 MHz, D<sub>2</sub>O)  $\delta$  5.12 (0.78H, d, *J* = 2.8 Hz), 4.67 (1.06H, m), 4.21-4.18 (1.10H, m), 3.89-3.75 (8.11H, m), 3.74-3.56 (59.91H, m), 3.52-3.38 (30.63H, m), 1.98-1.96 (3H, m); <sup>13</sup>C NMR (100 MHz, D<sub>2</sub>O)  $\delta$  174.48, 174.22, 100.22, 94.92, 90.52, 81.23, 79.75, 79.52, 74.70, 74.57, 72.36, 70.84, 70.55, 70.16, 69.96, 69.74, 69.64, 69.33, 69.13, 68.21, 67.13, 65.77, 60.28, 60.16, 56.12, 53.72, 50.27, 45.08, 43.38, 22.21, 21.91; HRMS: [M + H]<sup>+</sup> calcd for C<sub>56</sub>H<sub>104</sub>N<sub>19</sub>O<sub>27</sub><sup>+</sup>, 1474.7344; found, 1474.7427.

### Synthesis of compound (30).

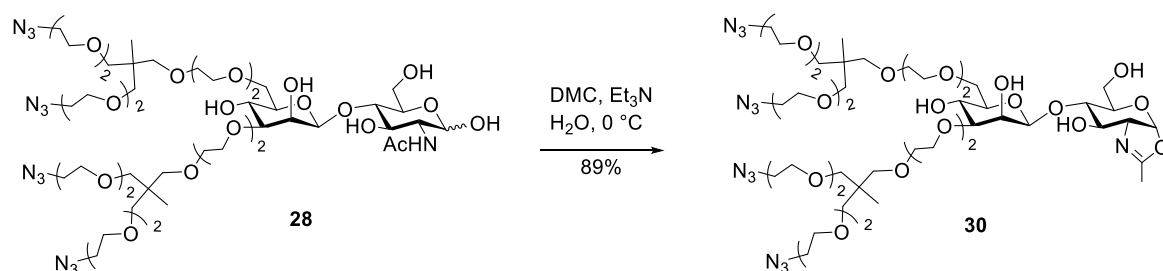

To a solution of compound **28** (9.0 mg, 7.4  $\mu$ mol) in H<sub>2</sub>O (500  $\mu$ L) were added Et<sub>3</sub>N (62.2  $\mu$ L) and 2-chloro-1,3-dimethylimidazolium chloride (DMC, 37.5 mg) at 0 °C. The reaction mixture was stirred at this temperature overnight then purified by gel filtration on a Sephadex G-10 column that was eluted with 0.1% aq Et<sub>3</sub>N to afford compound **30** (7.9 mg, 89%) as colorless oil after lyophilization with 5 mol.% of NaOH. <sup>1</sup>H NMR (400 MHz, D<sub>2</sub>O)  $\delta$  6.00 (1H, d, *J* = 7.3 Hz), 4.61-4.60 (1H, m), 4.28-4.27 (1H, m), 4.12-4.10 (2H, m), 3.83-3.77 (4H, m), 3.66-3.61 (34H, m), 3.69-3.61 (35H, m), 3.60-3.57 (15H, m), 3.43-3.39 (11H, m), 3.36-3.34 (14H, m), 1.99 (3H, s), 0.87 (6H, m); <sup>13</sup>C NMR (100 MHz, D<sub>2</sub>O)  $\delta$  168.11, 100.84, 99.50, 80.80, 77.34, 74.64, 73.14, 70.52, 70.17, 70.11, 69.88, 69.74, 69.54, 69.19, 69.10, 68.87, 67.76, 66.63, 65.53, 64.89, 61.27, 46.06, 40.06, 16.41, 12.57; HRMS: [M + H]<sup>+</sup> calcd for C<sub>48</sub>H<sub>88</sub>N<sub>13</sub>O<sub>22</sub><sup>+</sup>, 1198.6161; found, 1198.6216.

### Synthesis of compound (31).

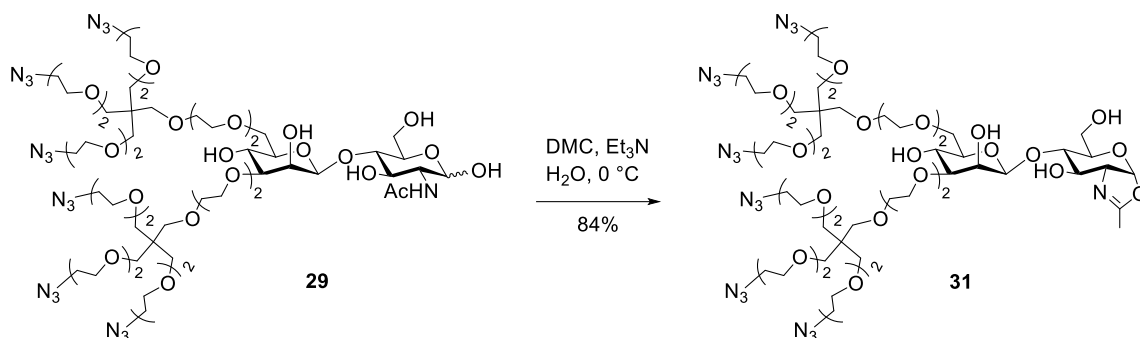

To a solution of compound **29** (10.0 mg, 6.8  $\mu$ mol) in H<sub>2</sub>O (500  $\mu$ L) were added Et<sub>3</sub>N (56.9  $\mu$ L) and 2-chloro-1,3-dimethylimidazolium chloride (DMC, 34.4 mg) at 0 °C. The reaction mixture was stirred at this temperature overnight then purified by gel filtration on a Sephadex G-10 column that was eluted with 0.1% aq Et<sub>3</sub>N to afford compound **31** (8.3 mg, 84%) as colorless oil after lyophilization with 5 mol.% of NaOH. <sup>1</sup>H NMR (400 MHz, D<sub>2</sub>O)  $\delta$  6.01 (1H, d,  $J$  = 7.3 Hz), 4.62-4.61 (1H, m), 4.30-4.29 (1H, m), 4.13-4.10 (2H, m), 3.84-3.77 (5H, m), 3.68-3.62 (38H, m), 3.61-3.57 (18H, m), 3.48-3.34 (33H, m), 2.93-2.90 (1H, m), 3.36-3.34 (14H, m), 1.99 (3H, d,  $J$  = 1.7 Hz); <sup>13</sup>C NMR (100 MHz, D<sub>2</sub>O)  $\delta$  101.30, 99.89, 81.21, 77.78, 75.03, 70.84, 70.30, 70.16, 69.95, 69.46, 68.20, 68.12, 66.96, 65.91, 65.25, 61.68, 12.99 (selected peaks); HRMS: [M + H]<sup>+</sup> calcd for C<sub>56</sub>H<sub>102</sub>N<sub>19</sub>O<sub>26</sub><sup>+</sup>, 1456.7238; found, 1456.7310.

### Synthesis of Biotin-tagged disaccharide (39a).

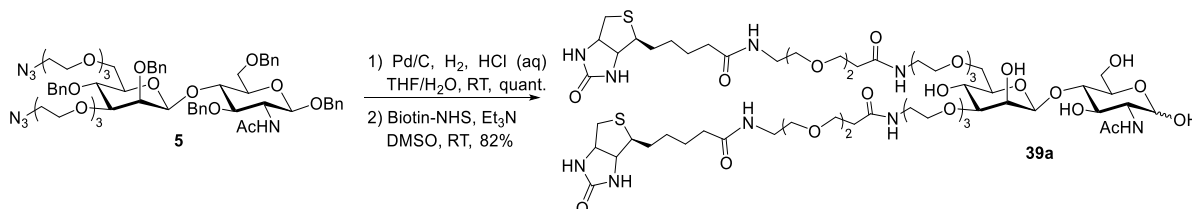

To a solution of compound **5** (56 mg, 0.049 mmol) and Pd/C (10 wt.% loading, 28 mg) in THF (3.0 mL) and H<sub>2</sub>O (1.0 mL) was added 2 M HCl (aq, 84  $\mu$ L, 3.5 eq), then stirred under H<sub>2</sub> atmosphere overnight. After LC-MS analysis showed the complete conversion to free amine intermediate, the reaction mixture was filtered through a Celite pad and purified by Sephadex LH-20 (H<sub>2</sub>O) to give the intermediate in hydrochloride form (35 mg, quant.). Then a solution of the intermediate (6.6 mg, 9.2  $\mu$ mol) and Biotin-NHS (11.5 mg, 0.023 mmol) in DMSO (200  $\mu$ L) was added Et<sub>3</sub>N (5.2  $\mu$ L) and the mixture was incubated at room temperature until ESI-MS indicated the complete consumption of the free amine. Preparative RP-HPLC (gradient, 10–40% aq MeCN containing 0.1% FA for 40 min; flow rate, 10.0 mL/min) afforded compound **39a** (13.0 mg, 82%) as white solid. HRMS: [M + H]<sup>+</sup> calcd for C<sub>60</sub>H<sub>106</sub>N<sub>9</sub>O<sub>25</sub>S<sub>2</sub><sup>+</sup>, 1416.6736; found, 1416.6799.

### Synthesis of Biotin-tagged disaccharide oxazoline (39).

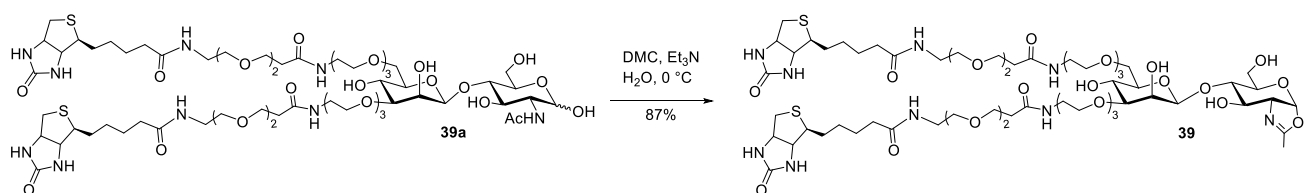

To a solution of compound **39a** (4.6 mg, 3.2 μmol) in H<sub>2</sub>O (300 μL) were added Et<sub>3</sub>N (18 μL) and 2-chloro-1,3-dimethylimidazolium chloride (DMC, 11 mg) at 0 °C. The reaction mixture was stirred at this temperature for 8 h then purified by gel filtration on a Sephadex G-10 column that was eluted with 0.1% aq Et<sub>3</sub>N to afford compound **39** (4.0 mg, 87%) as white solid after lyophilization with 5 mol.% of NaOH. HRMS: [M + Na]<sup>+</sup> calcd for C<sub>60</sub>H<sub>103</sub>N<sub>9</sub>NaO<sub>24</sub>S<sub>2</sub><sup>+</sup>, 1420.6450; found, 1420.6499.

### Synthesis of TAMRA-tagged disaccharide (**40a**).

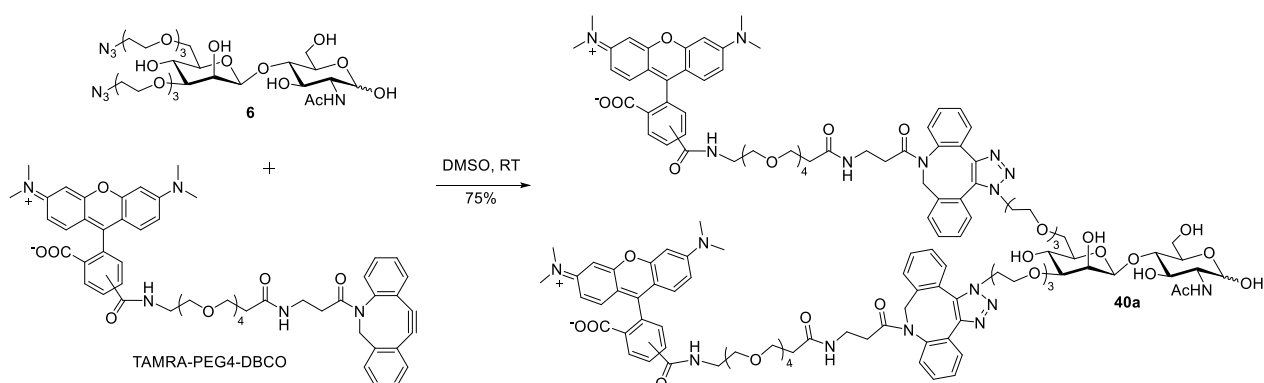

A solution of compound **6** (0.75 mg, 1.1 μmol) and TAMRA-PEG4-DBCO (3.0 mg, 3.2 μmol) in DMSO (0.6 mL) was incubated at room temperature overnight. The product was purified by semi-preparative RP-HPLC (gradient, 20–45% aq MeCN containing 0.1% FA for 40 min; flow rate, 4.0 mL/min) to give compound **40a** (2.0 mg, 75%) as purple solid. HRMS: [M + 3H]<sup>3+</sup> calcd for C<sub>134</sub>H<sub>164</sub>N<sub>17</sub>O<sub>35</sub><sup>3+</sup>, 857.3864; found, 857.3898.

### Synthesis of TAMRA-tagged disaccharide oxazoline (**40**).

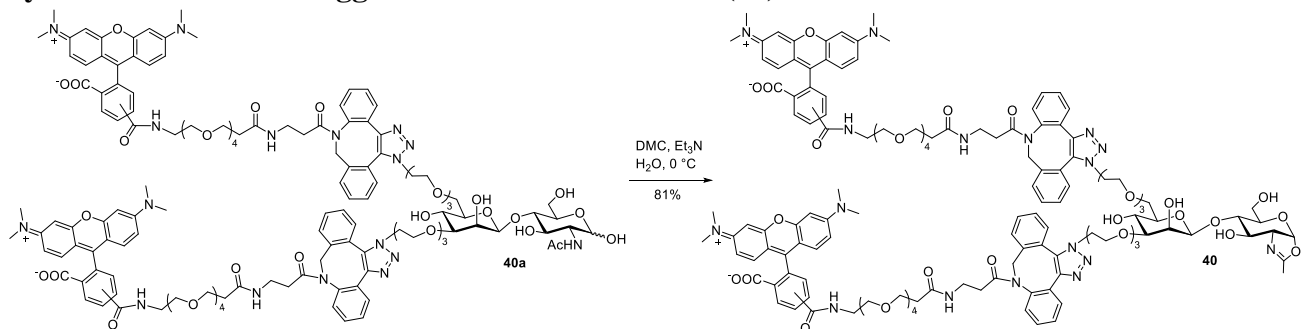

To a solution of compound **40a** (1.6 mg, 0.6 μmol) in H<sub>2</sub>O (100 μL) were added Et<sub>3</sub>N (5.6 μL) and 2-chloro-1,3-dimethylimidazolium chloride (DMC, 3.4 mg) at 0 °C. The reaction mixture was stirred at this temperature for 8 h then purified by gel filtration on a Sephadex G-10 column that was eluted with 0.1% aq Et<sub>3</sub>N to afford compound **40** (1.3 mg, 81%) as purple solid after lyophilization with 5 mol.% of NaOH. HRMS: [M + 3H]<sup>3+</sup> calcd for C<sub>134</sub>H<sub>162</sub>N<sub>17</sub>O<sub>34</sub><sup>3+</sup>, 851.3829; found, 851.3869.



## 2. Screening of the transglycosylation conditions.

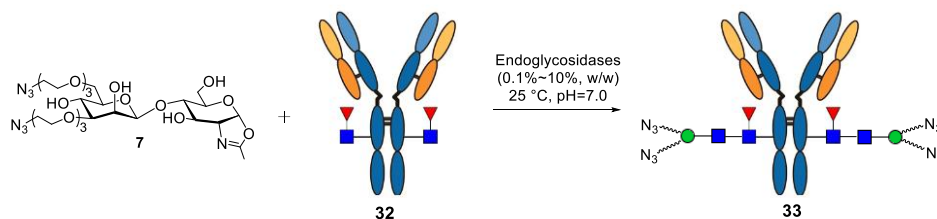

A solution of GNF-Herceptin **32** (100 µg) and oxazoline **7** (18.6 µg, 20 eq per reaction site) was incubated with different endoglycosidases (0.1 µg ~ 10 µg) at 25 °C in 5 µL of 150 mM PBS buffer (pH 7.0), and the reaction was monitored by LC-MS of aliquots. The ratio of the starting material and the product species were determined by the peak intensities, and the conversion yields were based on the reaction sites.

| Enzymes       | Sources                           |
|---------------|-----------------------------------|
| Endo-S        | <i>Streptococcus pyogenes</i>     |
| Endo-S D233Q  | <i>Streptococcus pyogenes</i>     |
| Endo-S2       | <i>Streptococcus pyogenes M49</i> |
| Endo-S2 D184M | <i>Streptococcus pyogenes M49</i> |
| Endo-F3       | <i>Elizabethkingia miricola</i>   |
| Endo-F3 DA65A | <i>Elizabethkingia miricola</i>   |
| Endo-A        | <i>Arthrobacter protophormiae</i> |
| Endo-CC       | <i>Coprinopsis cinerea</i>        |
| Endo-D        | <i>Streptococcus pneumoniae</i>   |

### 3. LC-MS analysis of the transglycosylation reactions.

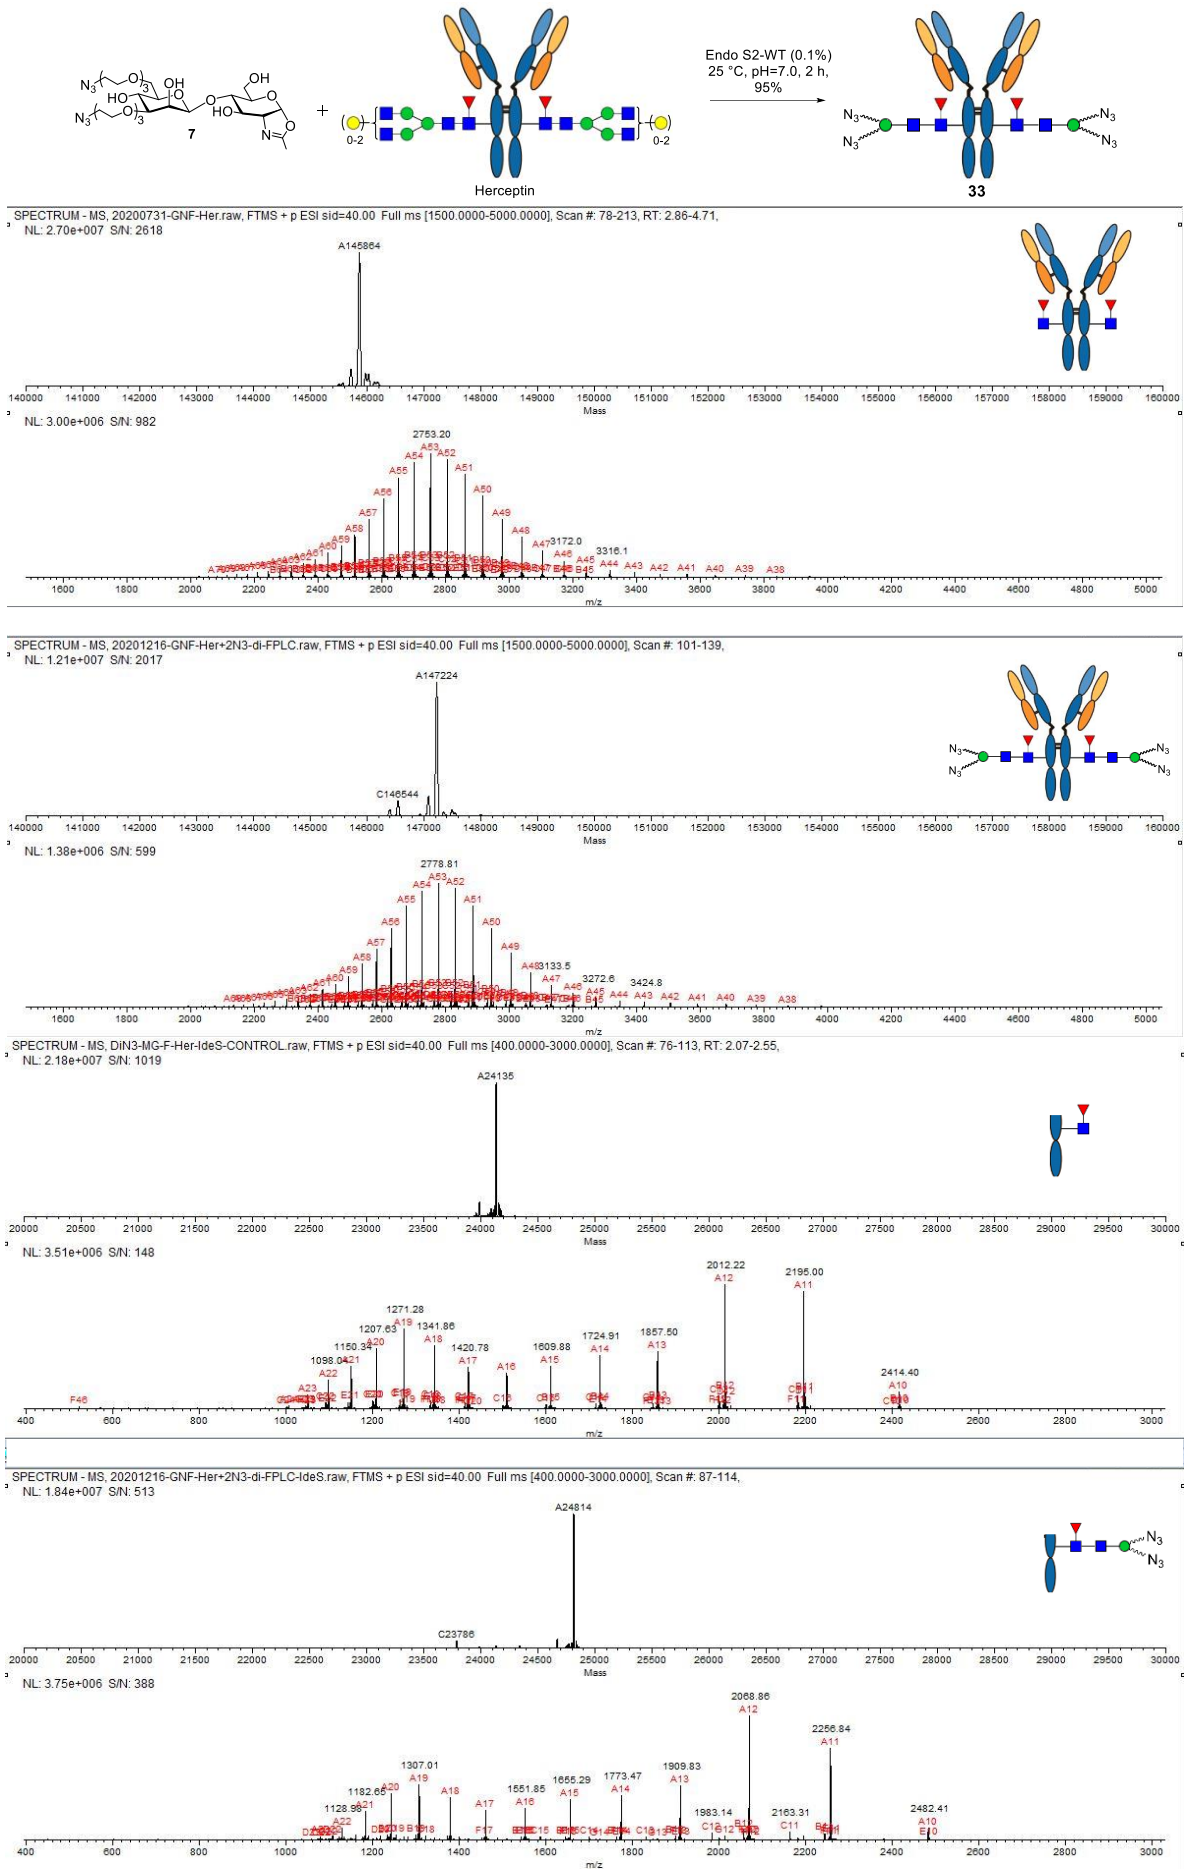

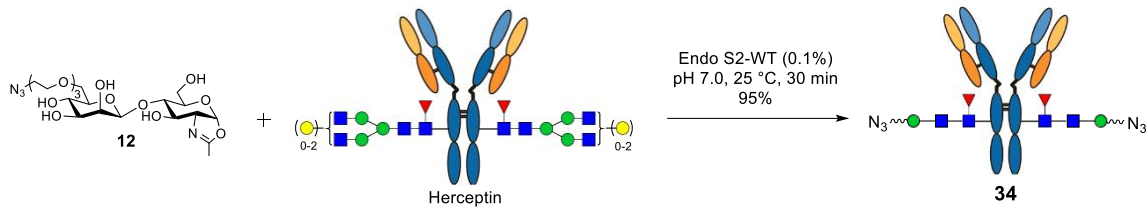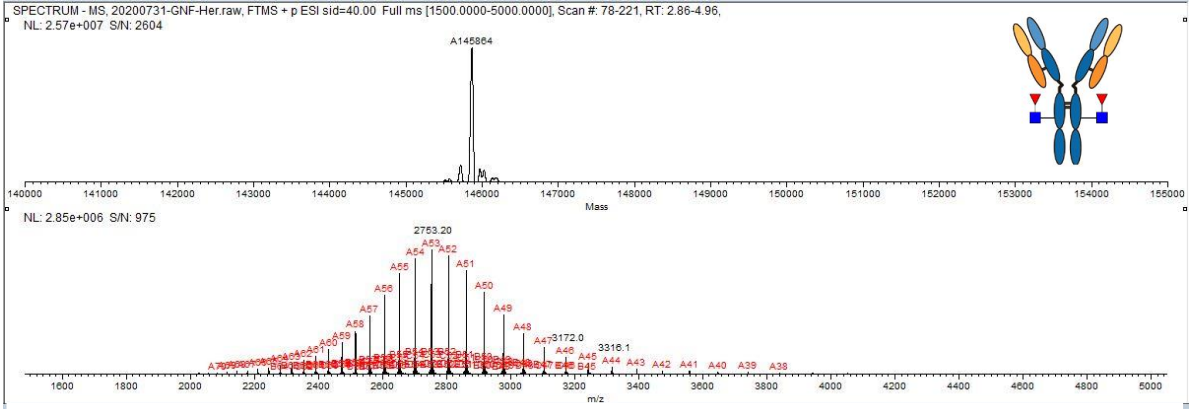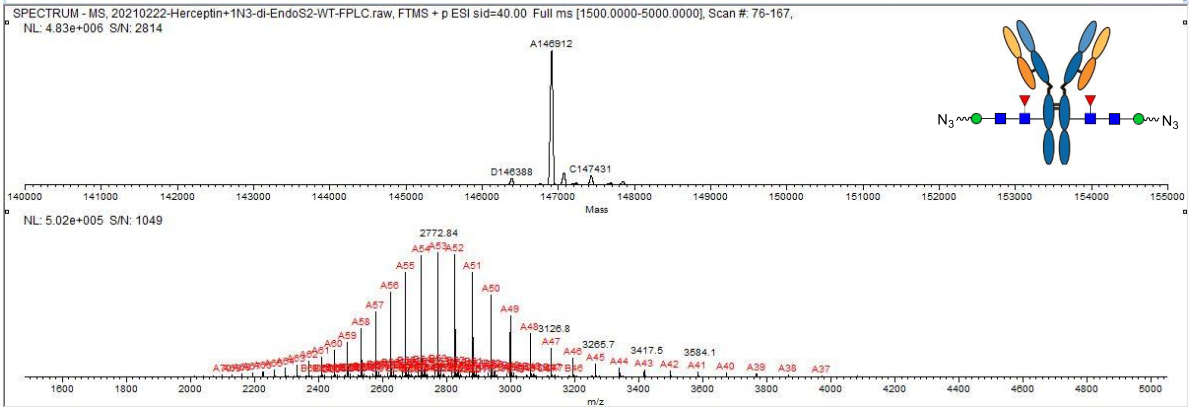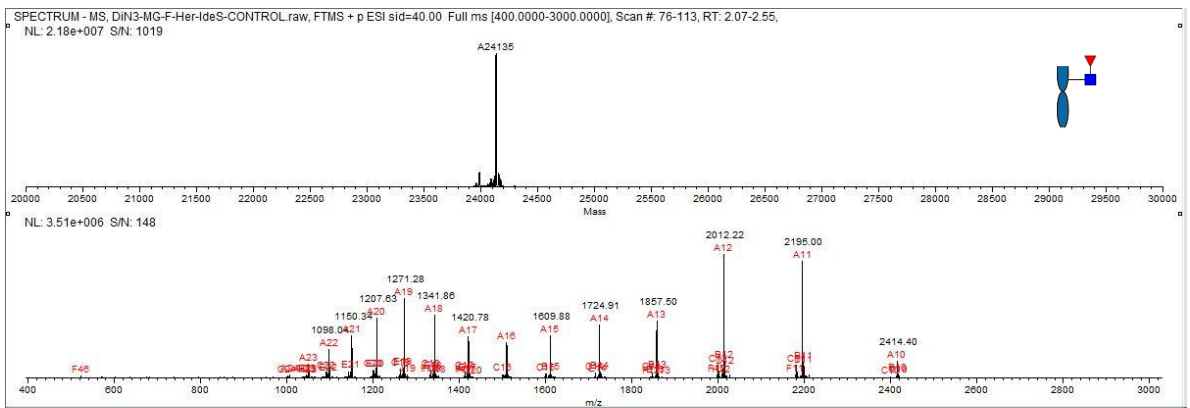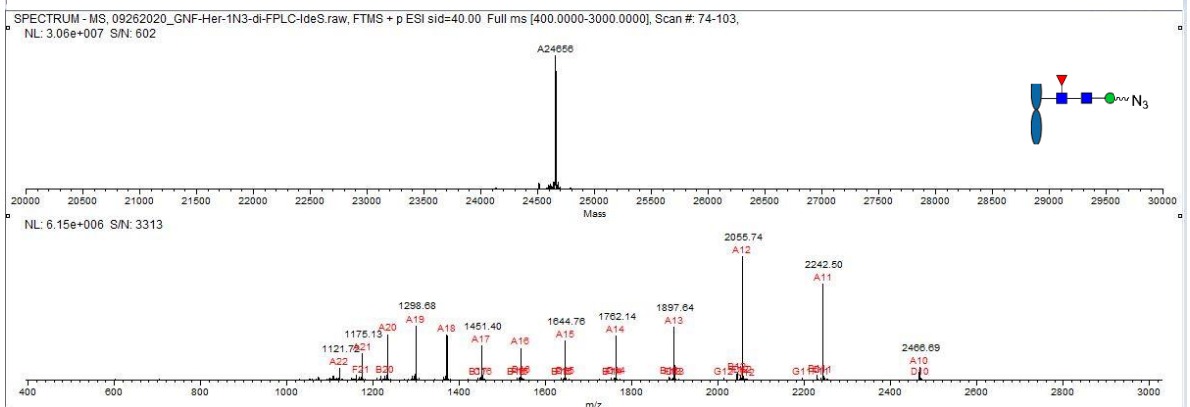

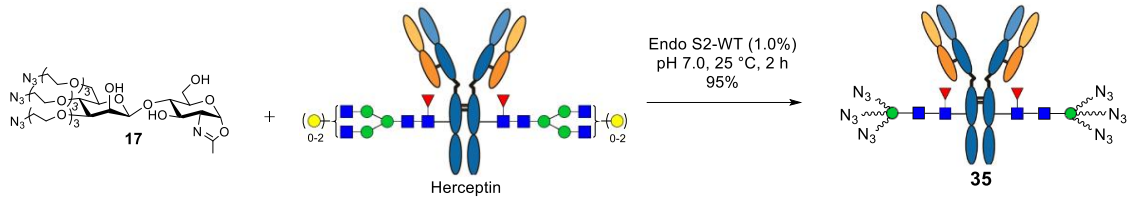

SPECTRUM - MS, 20200731-GNF-Her.raw, FTMS + p ESI sid=40.00 Full ms [1500.0000-5000.0000], Scan #: 78-213, RT: 2.86-4.71, NL: 2.70e+007 S/N: 2618

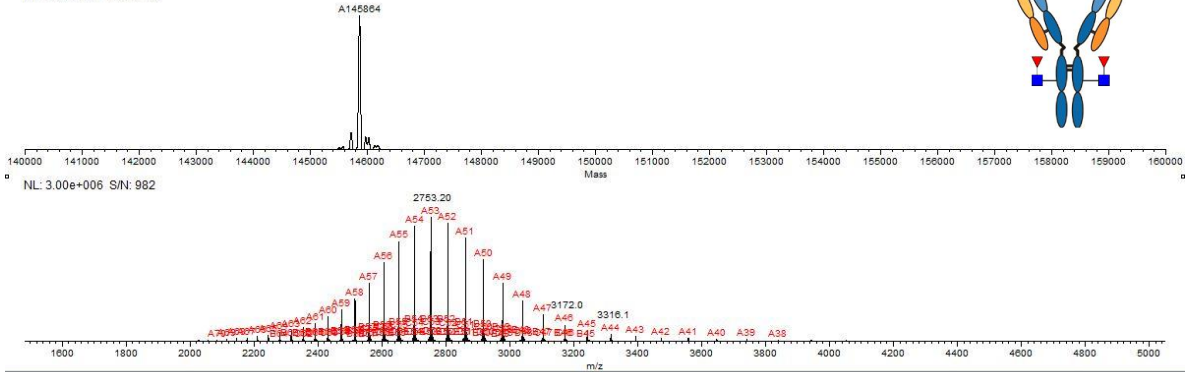

SPECTRUM - MS, 20210212-GNF-Her+3N3-di-EndoS2\_100-FPLC.raw, FTMS + p ESI sid=40.00 Full ms [1500.0000-5000.0000], Scan #: 79-120, NL: 1.56e+006 S/N: 2466

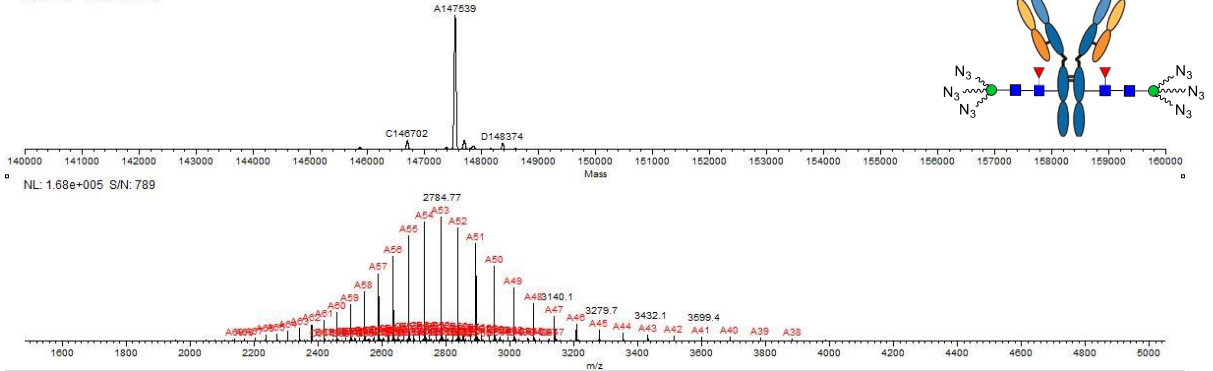

SPECTRUM - MS, DIN3-MG-F-Her-IdeS-CONTROL.raw, FTMS + p ESI sid=40.00 Full ms [400.0000-3000.0000], Scan #: 78-129, RT: 2.10-2.75, NL: 1.90e+007 S/N: 749

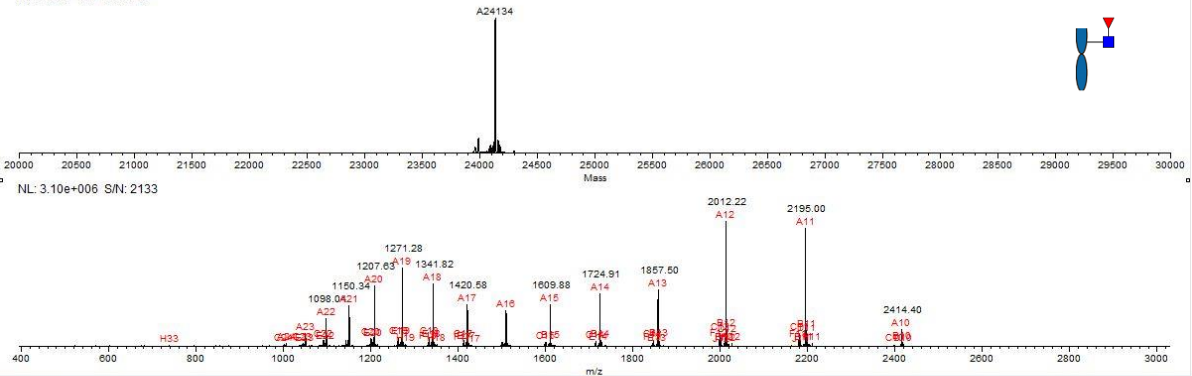

SPECTRUM - MS, 20210212-GNF-Her+3N3-di-EndoS2\_100-IdeS.raw, FTMS + p ESI sid=40.00 Full ms [400.0000-3000.0000], Scan #: 80-106, NL: 1.13e+006 S/N: 517

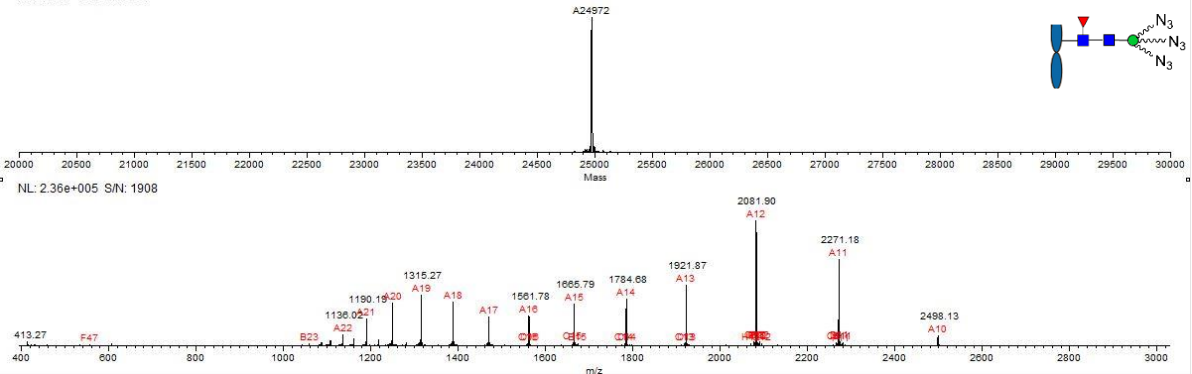



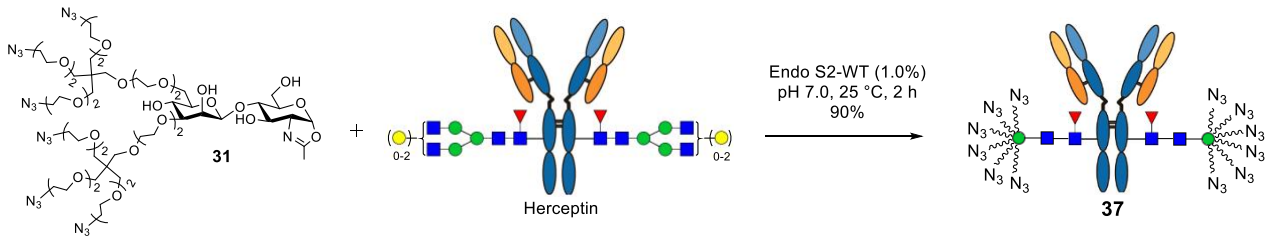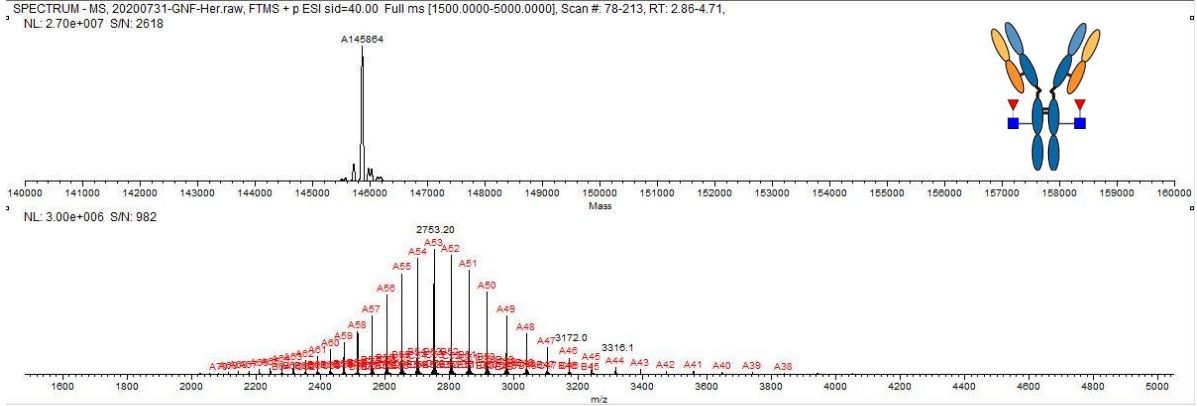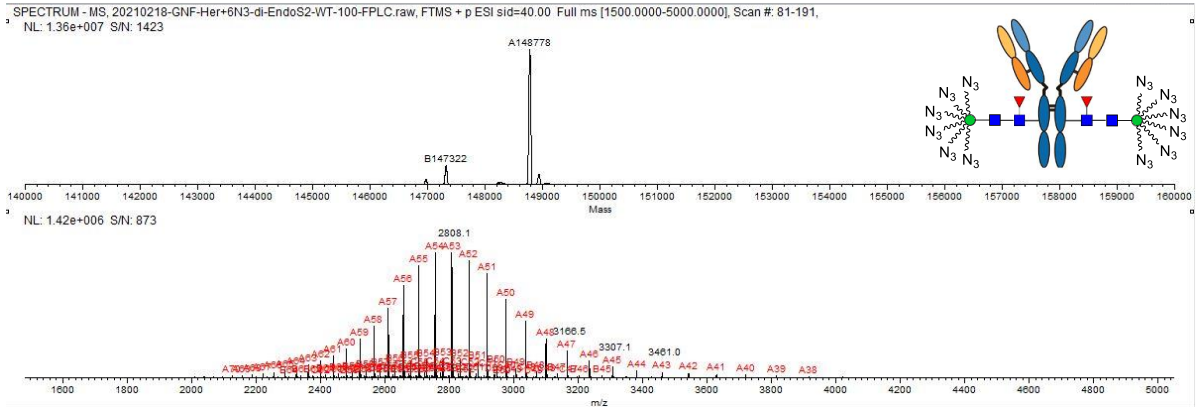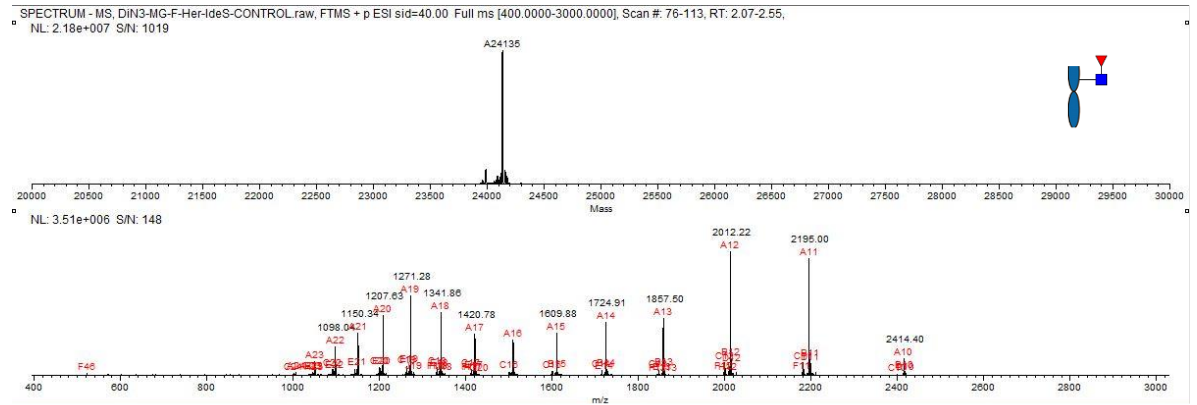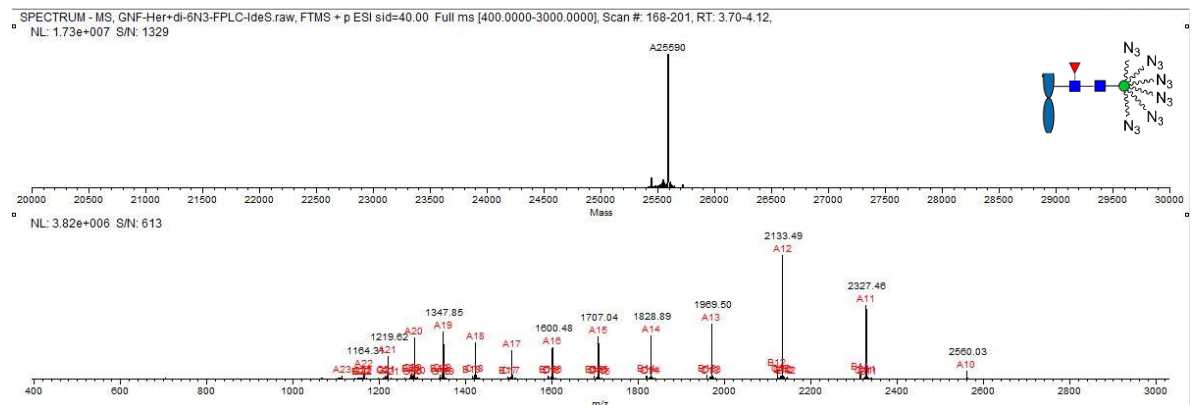

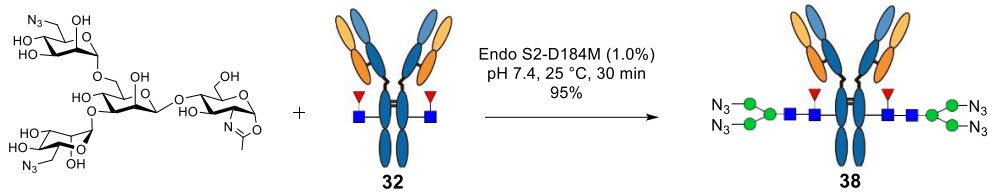

3 SPECTRUM - MS, 20200731-GNF-Her.raw, FTMS + p ESI sid=40.00 Full ms [1500.0000-5000.0000], Scan #: 91-174, RT: 3.09-4.13, NL: 3.88e+007 S/N: 3307

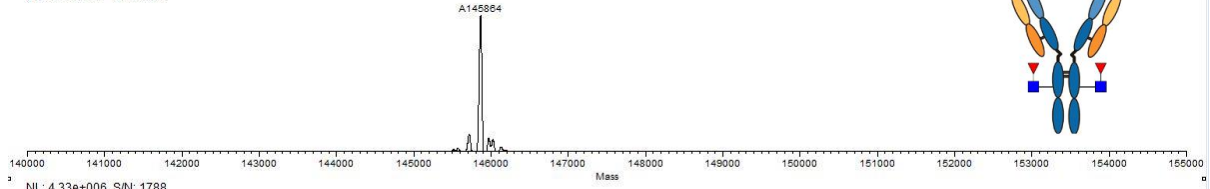

NL: 4.33e+006 S/N: 1788

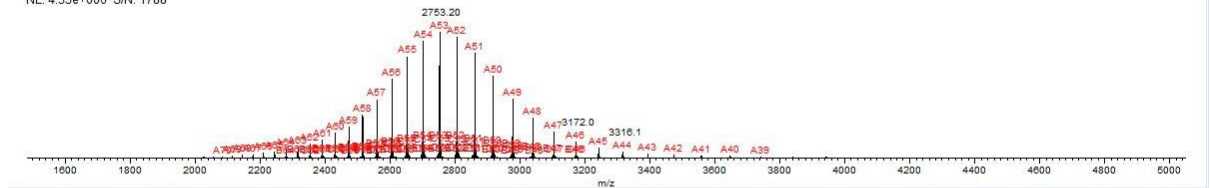

4 SPECTRUM - MS, 20210223-GNF-Her+2N3-Tetra-EndoS2-mutant-100-25min.raw, FTMS + p ESI sid=40.00 Full ms [1500.0000-5000.0000], NL: 1.23e+007 S/N: 2091

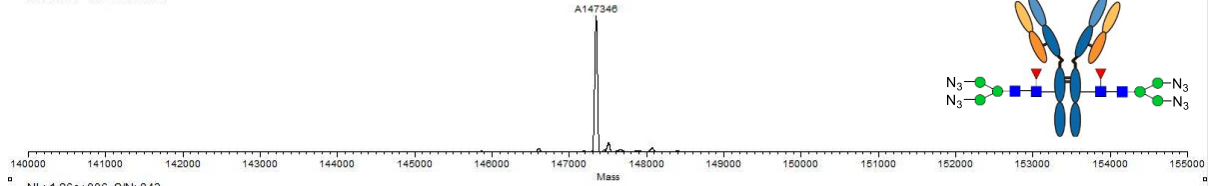

NL: 1.26e+006 S/N: 843

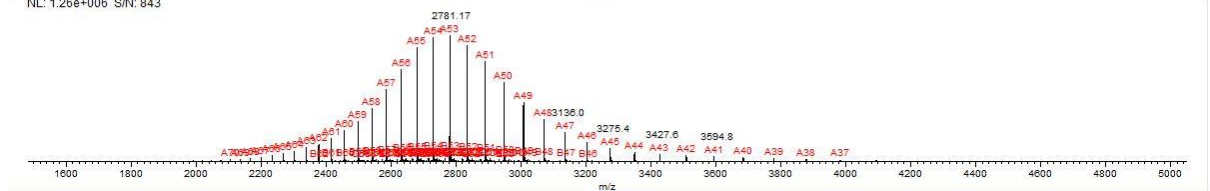

5 SPECTRUM - MS, DIN3-MG-F-Her-IdeS-CONTROL.raw, FTMS + p ESI sid=40.00 Full ms [400.0000-3000.0000], Scan #: 80-127, RT: 2.13-2.72, NL: 1.98e+007 S/N: 491

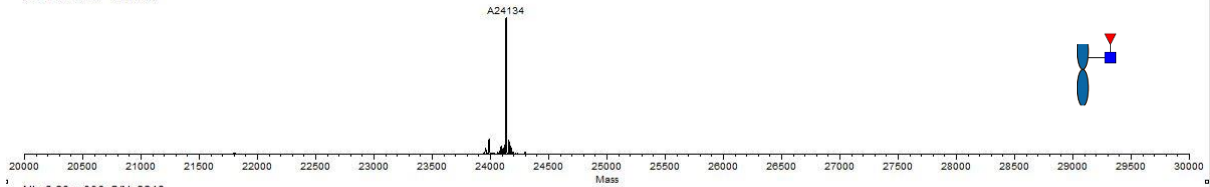

NL: 3.28e+006 S/N: 2219

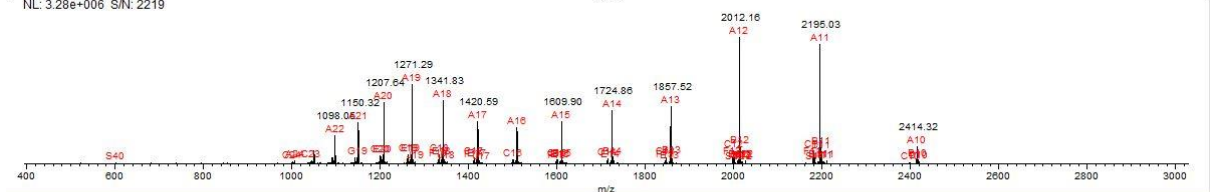

6 SPECTRUM - MS, 20210223-GNF-Her+2N3-Tetra-EndoS2-mutant-100-IdeS.raw, FTMS + p ESI sid=40.00 Full ms [400.0000-3000.0000], NL: 4.42e+005 S/N: 524

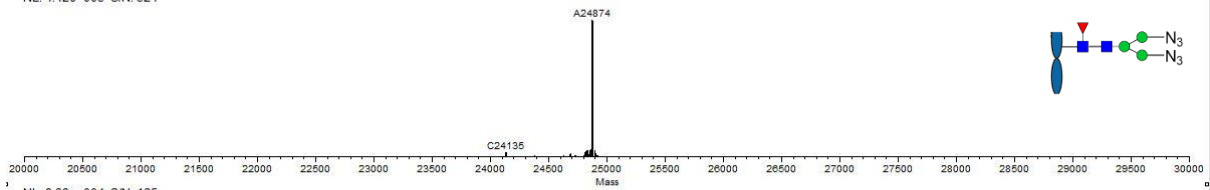

NL: 9.33e+004 S/N: 125

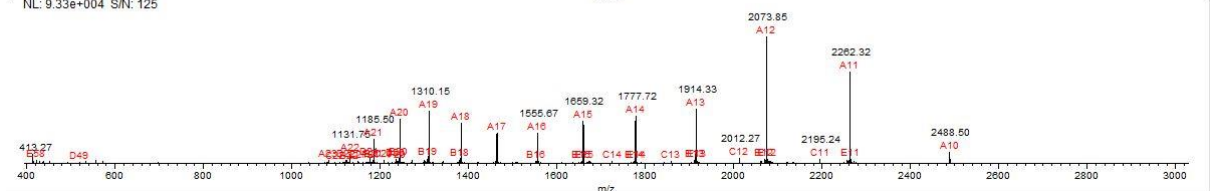

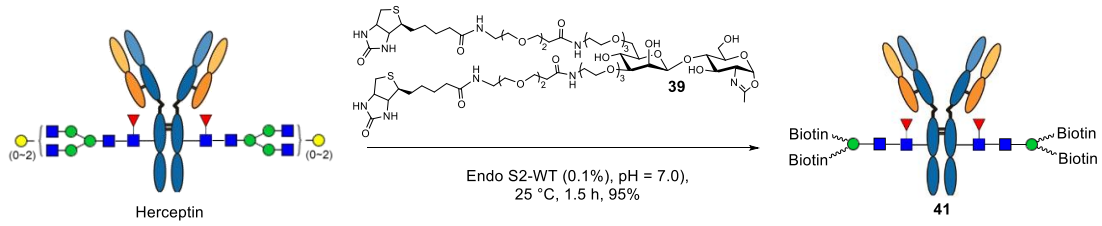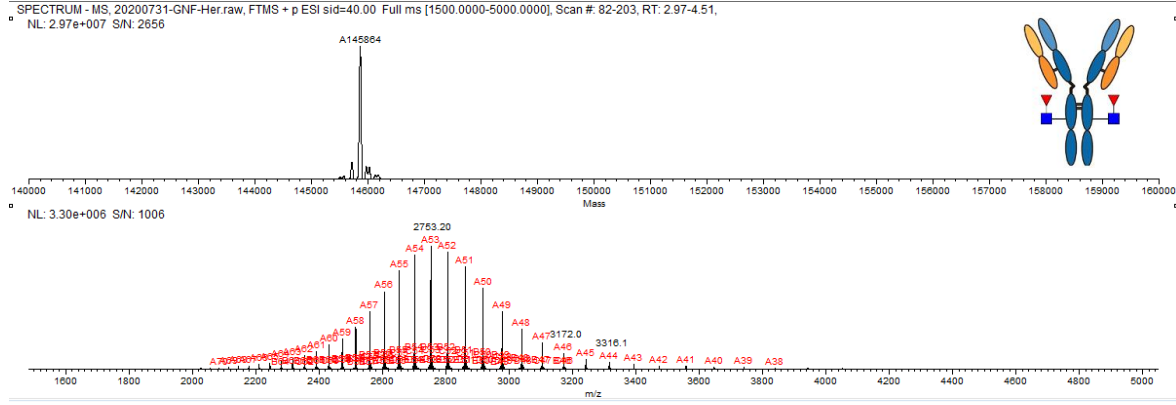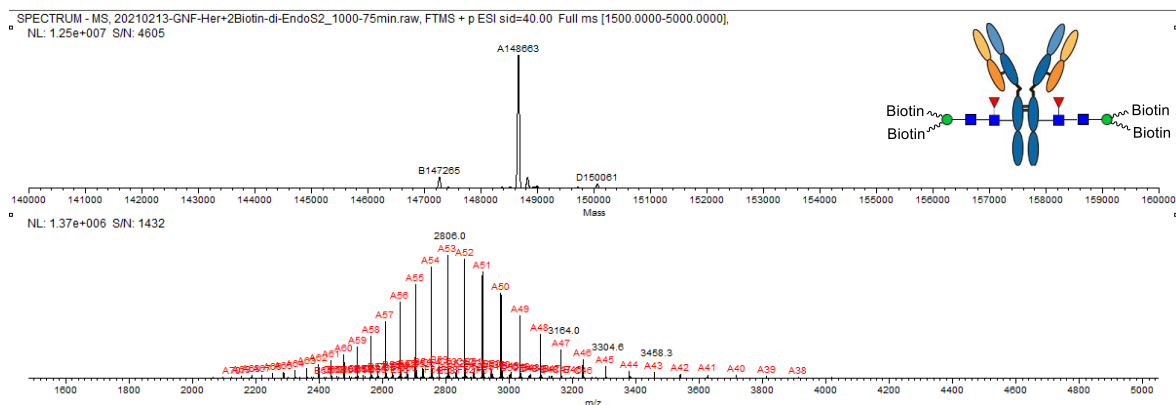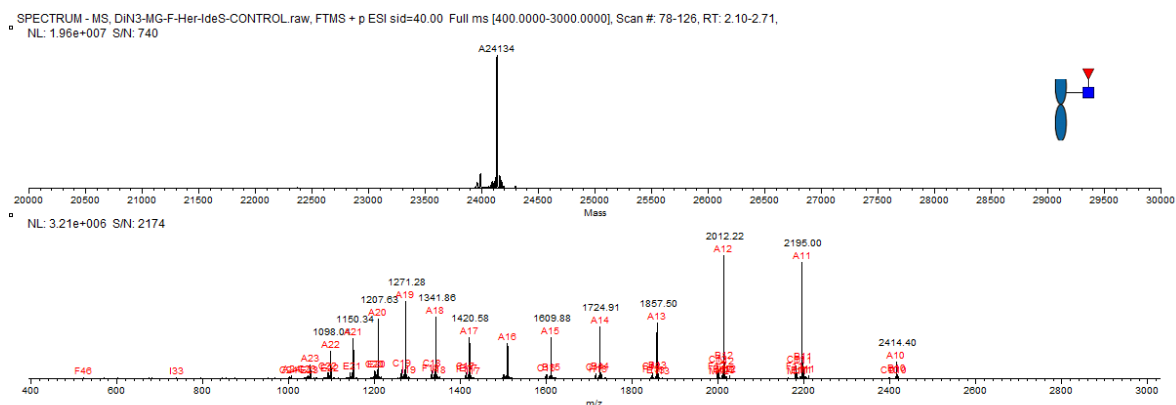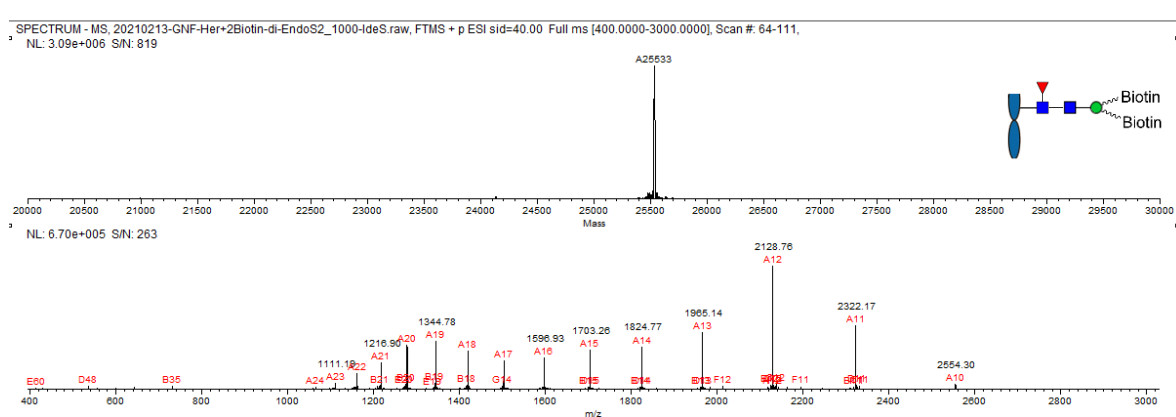



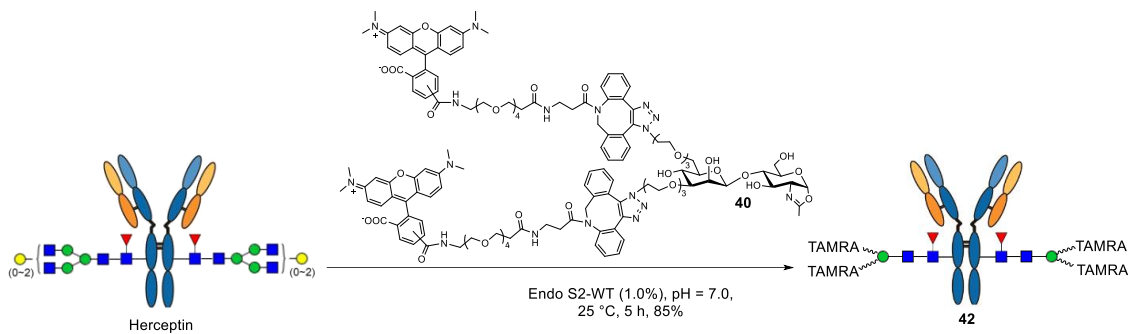

SPECTRUM - MS\_20200731-GNF-Her.raw, FTMS + p ESI sid=40.00 Full ms [1500.0000-5000.0000], Scan #: 82-203, RT: 2.97-4.51, NL: 2.97e+007 S/N: 2656

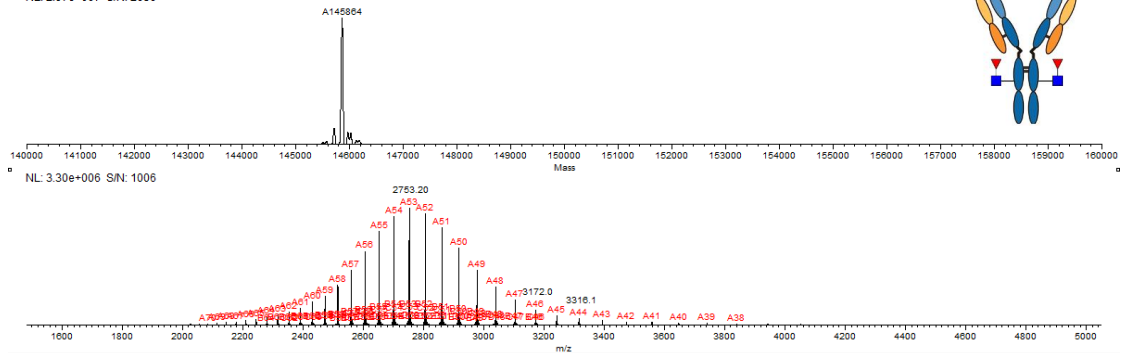

SPECTRUM - MS\_20210220-GNF-Her+2TAMRA-di-EndoS2-WT-100-300min.raw, FTMS + p ESI sid=40.00 Full ms [1500.0000-5000.0000], NL: 5.12e+006 S/N: 742

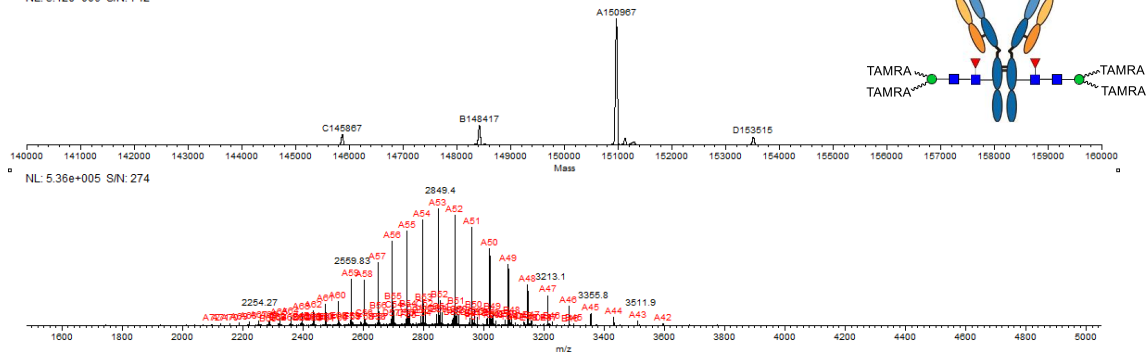

SPECTRUM - MS\_DIN3-MG-F-Her-IdeS-CONTROL.raw, FTMS + p ESI sid=40.00 Full ms [400.0000-3000.0000], Scan #: 78-126, RT: 2.10-2.71, NL: 1.96e+007 S/N: 740

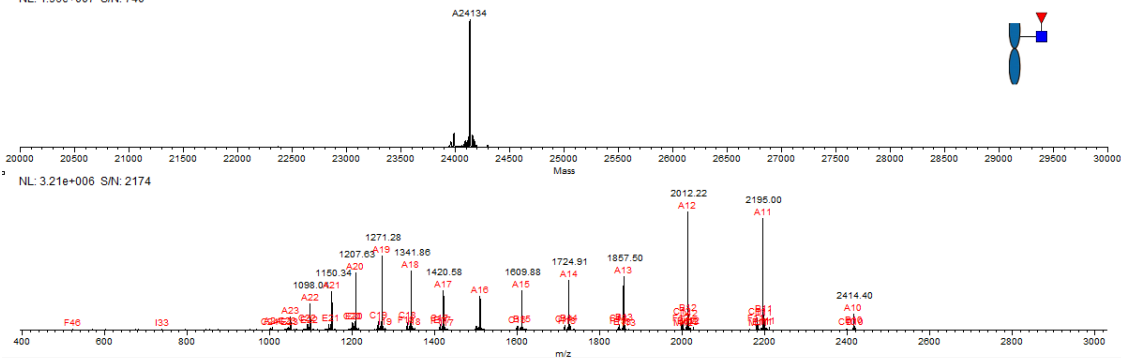

SPECTRUM - MS\_20210220-GNF-Her+2TAMRA-di-EndoS2-WT-100-IdeS.raw, FTMS + p ESI sid=40.00 Full ms [400.0000-3000.0000], NL: 2.59e+005 S/N: 16

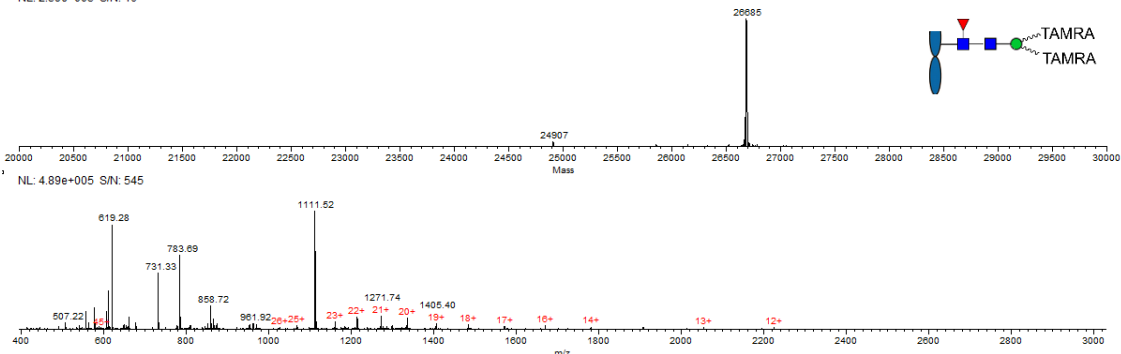

## 4. LC-MS analysis of the homogenous ADCs.

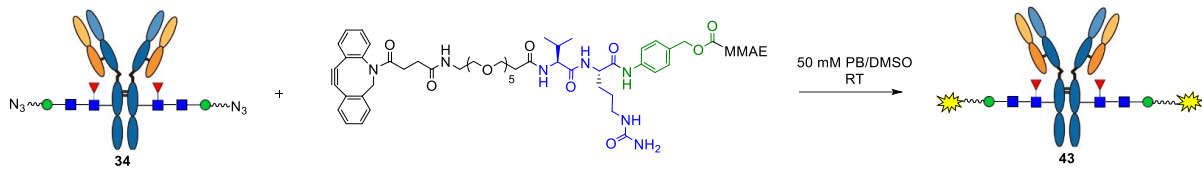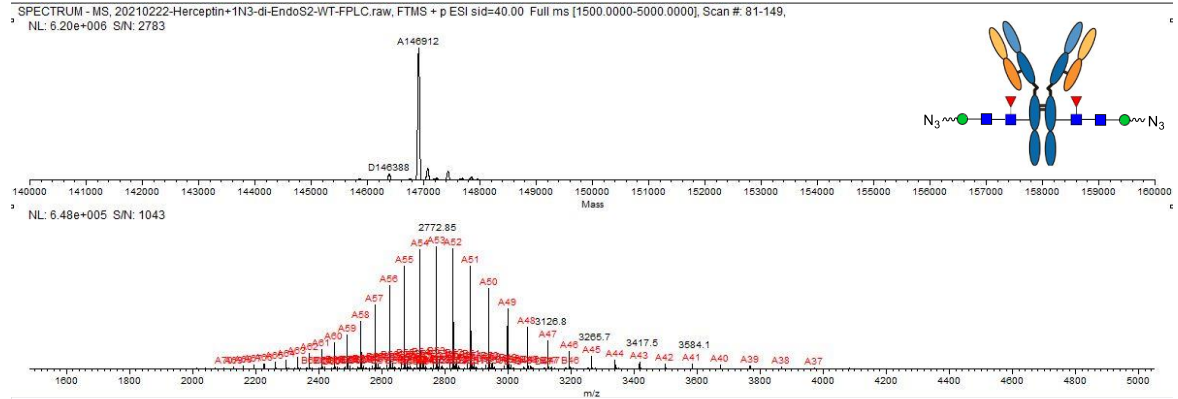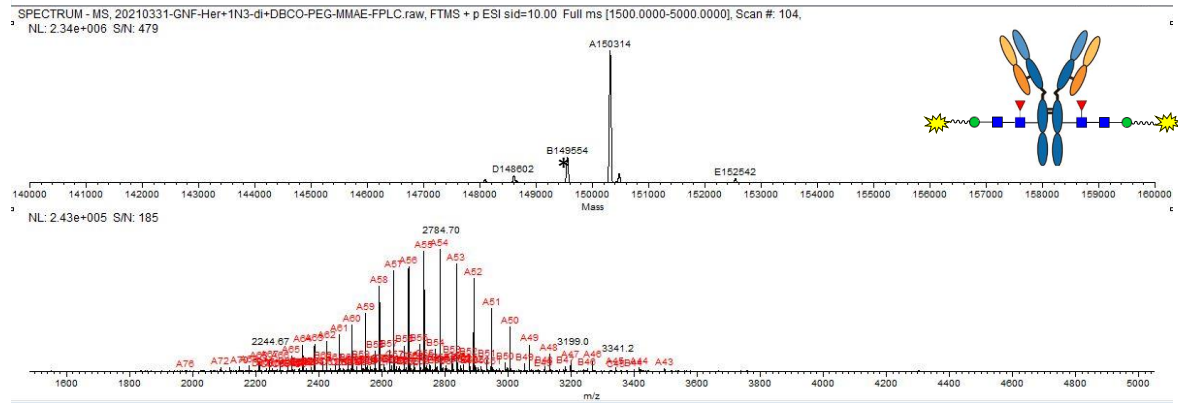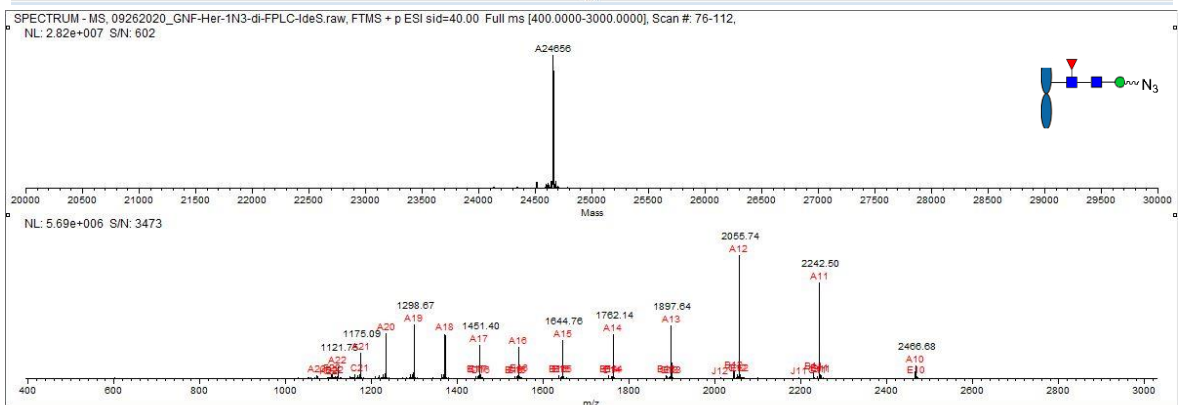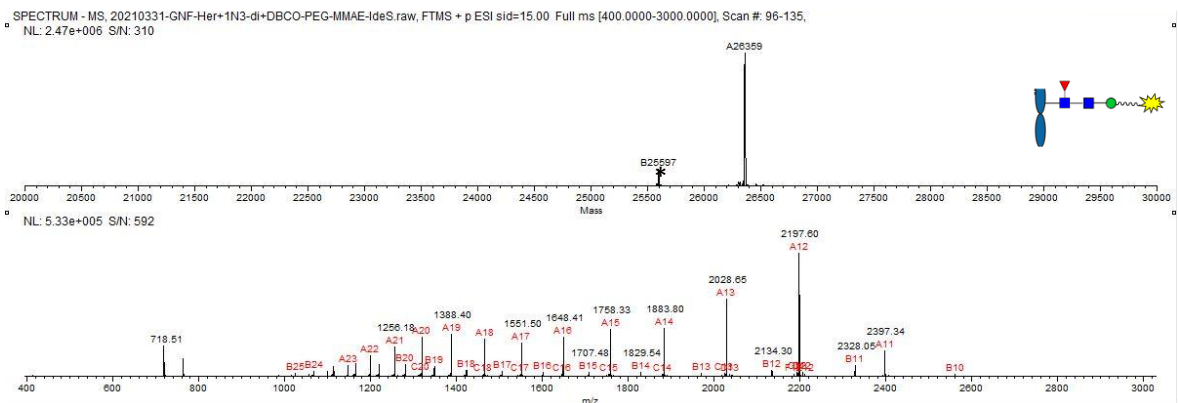

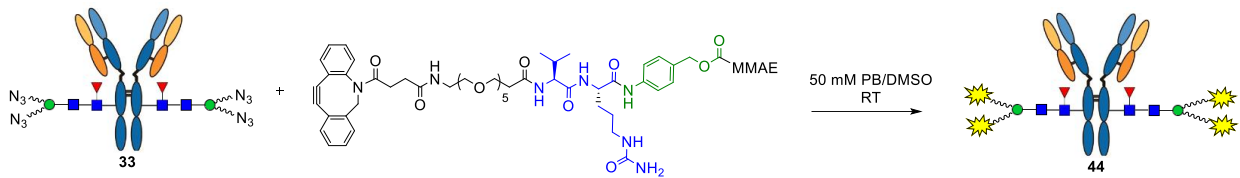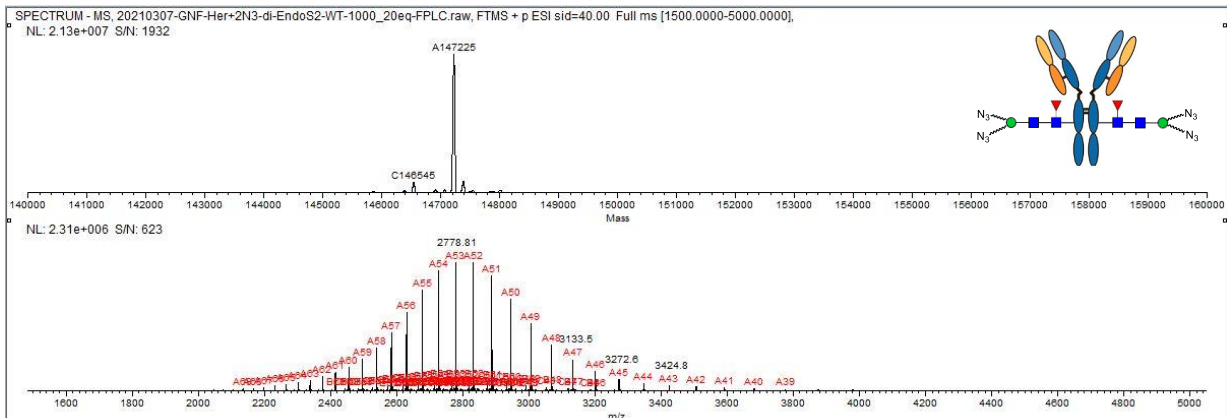



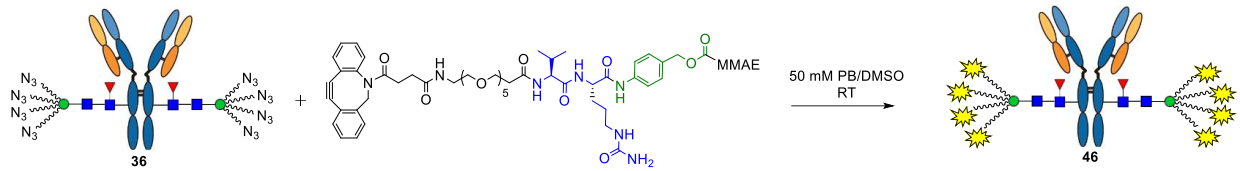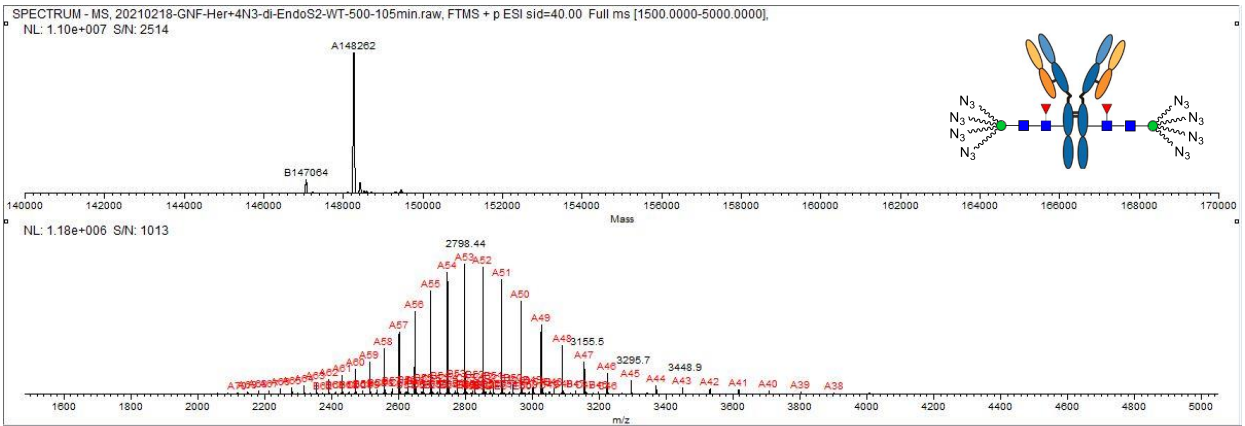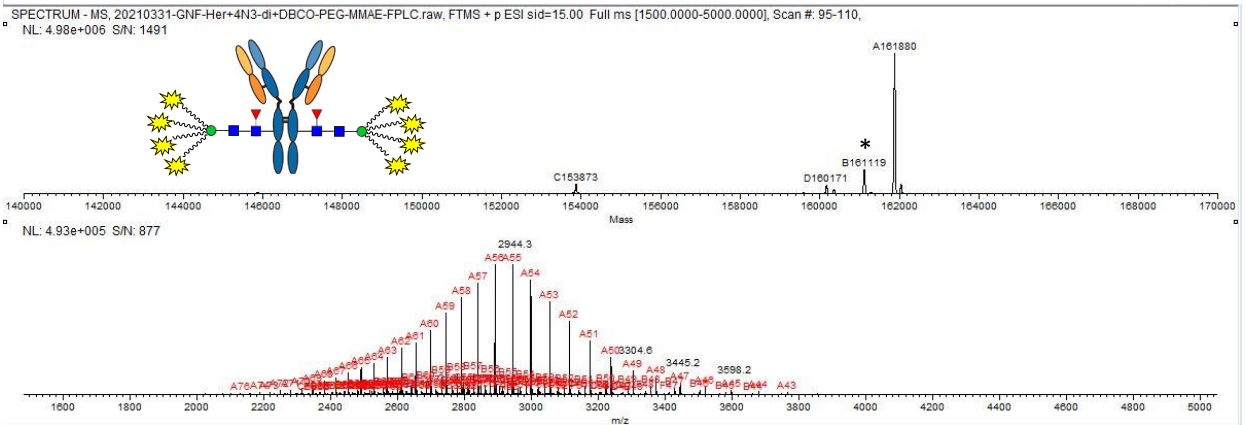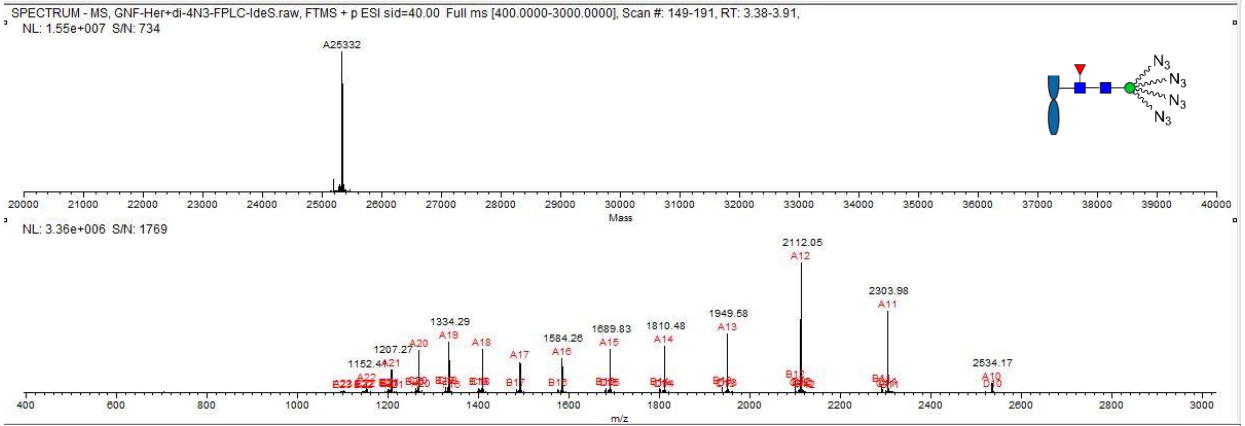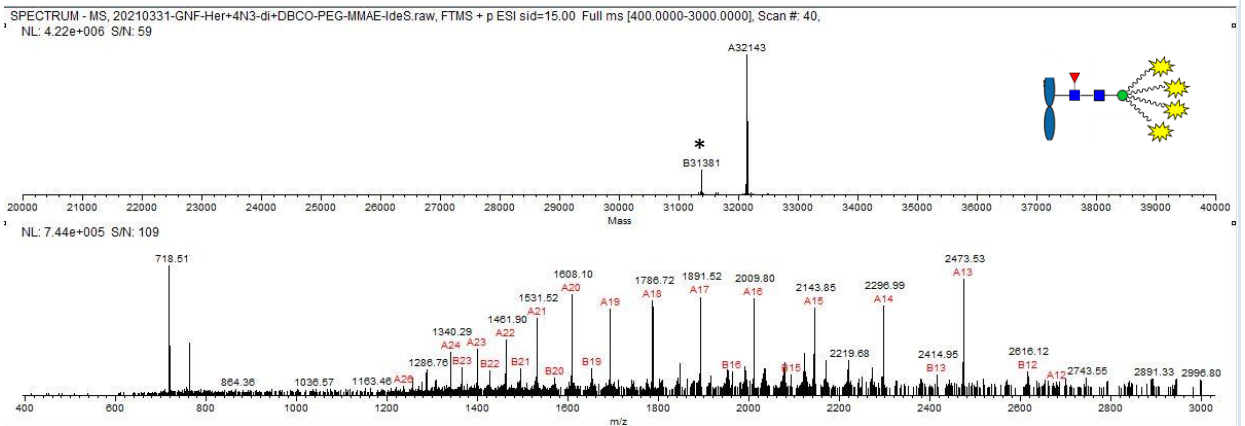

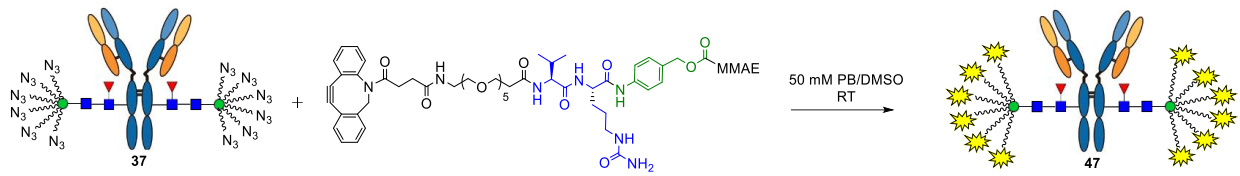

SPECTRUM - MS, 20210218-GNF-Her+6N3-di-EndoS2-WT-100-FPLC.raw, FTMS + p ESI sid=40.00 Full ms [1500.0000-5000.0000], Scan #: 84-186, NL: 1.44e+007 S/N: 1428

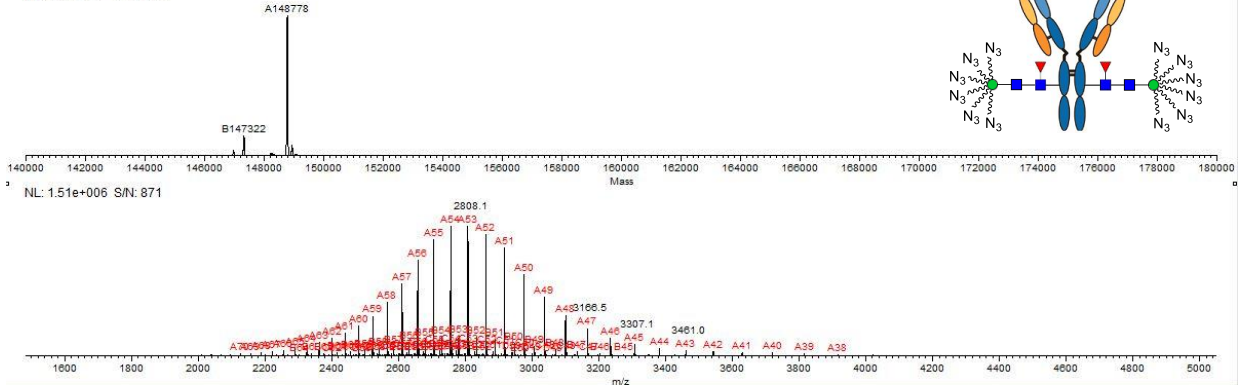

SPECTRUM - MS, 20210401-GNF-Her+6N3-di-DBCO-PEG-MMAE-FPLC.raw, FTMS + p ESI sid=15.00 Full ms [1500.0000-5000.0000], Scan #: 104-111, NL: 3.85e+006 S/N: 1008

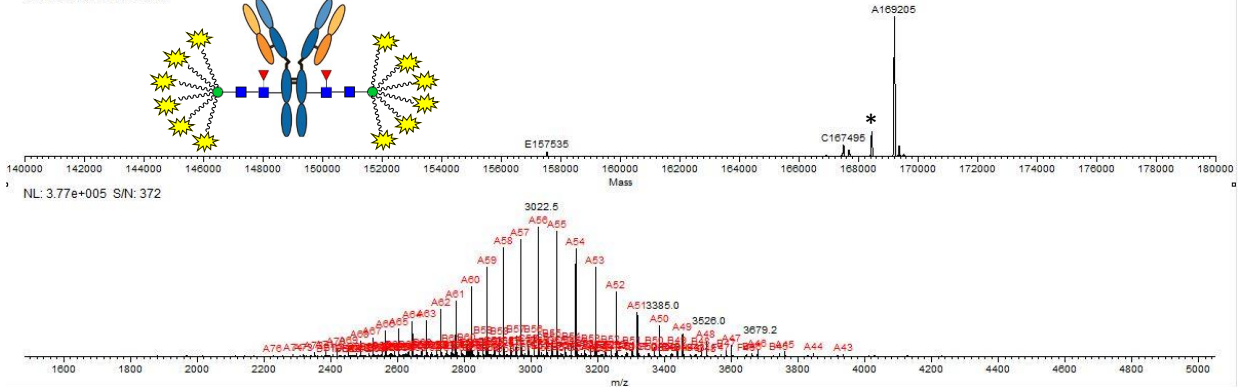

SPECTRUM - MS, GNF-Her+di-6N3-FPLC-IdeS.raw, FTMS + p ESI sid=40.00 Full ms [400.0000-3000.0000], Scan #: 171-212, RT: 3.74-4.26, NL: 1.69e+007 S/N: 924

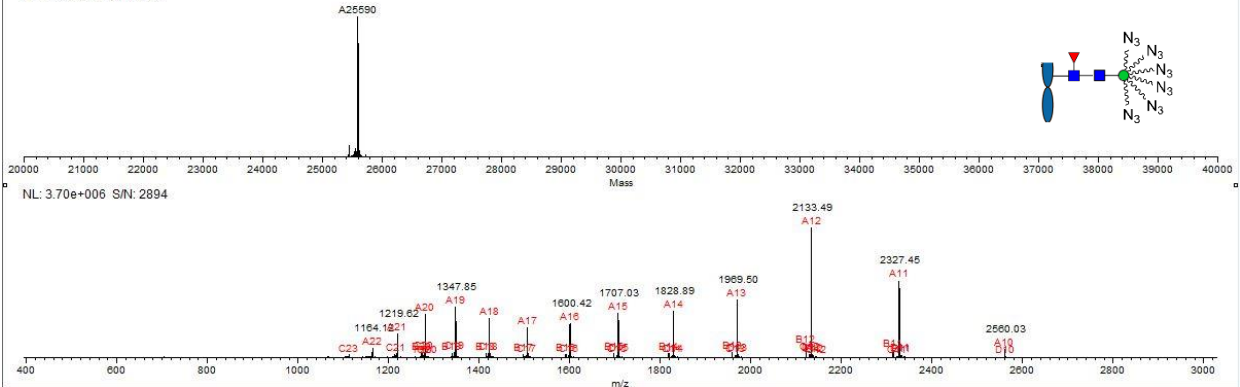

SPECTRUM - MS, 20210401-GNF-Her+6N3-di-DBCO-PEG-MMAE-FPLC-IdeS.raw, FTMS + p ESI sid=15.00 Full ms [400.0000-3000.0000], NL: 1.25e+006 S/N: 25

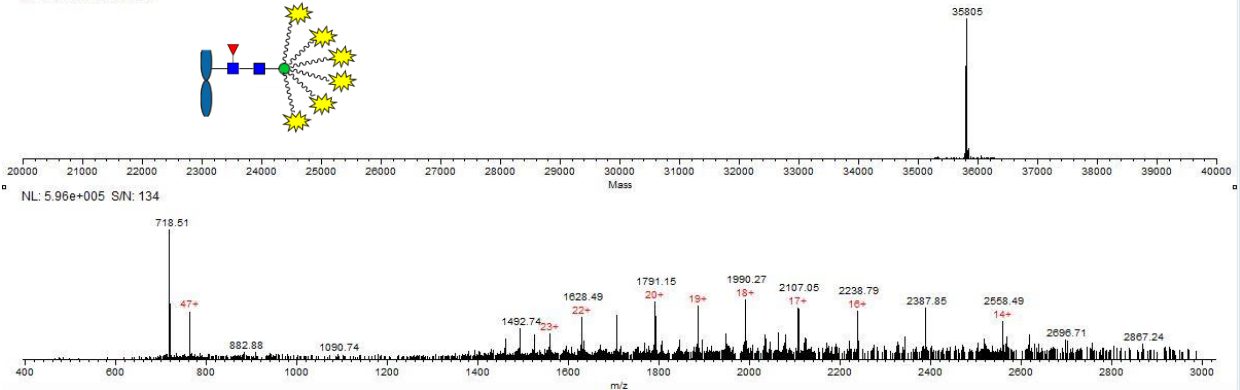



## 5. References:

1. H. Ochiai, W. Huang, L.-X. Wang, Expeditious chemoenzymatic synthesis of homogeneous N-glycoproteins carrying defined oligosaccharide ligands, *J Am Chem Soc*, **2008**, *130*, 13790-13803.
2. A. Lossouarn, K. Renault, L. Bailly, A. Frisby, P. L. Nahenec-Martel, P.-Y. Renard, C. Sabot, Maleimide-based metal-free ligation with dienes: a comparative study, *Org Biomol Chem*, **2020**, *18*, 3874-3887.
3. H. A Orgueira, A. Bartolozzi, P. Schell, R. E. J. N. Litjens, E. R. Palmacci, P. H. Seeberger, Modular Synthesis of Heparin Oligosaccharides, *Chem Eur J*, **2003**, *9*, 140-169.
4. B. Linclau, E. Cini, C. S. Oakes, S. Josse, M. Light, V. Ironmonger, Stereoarrays with an all-carbon quaternary center: diastereoselective desymmetrization of prochiral malonaldehydes, *Angew Chem Int Ed*, **2012**, *51*, 1232-1235.
5. W. Ji, L. Xiao, Y. Ling, C. Ching, M. Matsumoto, R. P. Bisbey, D. E. Helbling, W. R. Dichtel, *J Am Chem Soc*, **2018**, *140*, 12677-12681.
6. T. Kentaro, T. Taishi, H. Takeshi, S. Mitsuhiko, A Close-packed, Highly Insulating Organic Thin Monolayer on Si(111), *Chem Lett*, **2008**, *37*, 440-441.
7. C.-S. Kwan, A. S. C. Chan, K. C.-F. Leung, A Fluorescent and Switchable Rotaxane Dual Organocatalyst, *Org Lett*, **2016**, *18*, 976-979.



## 6. NMR Spectra

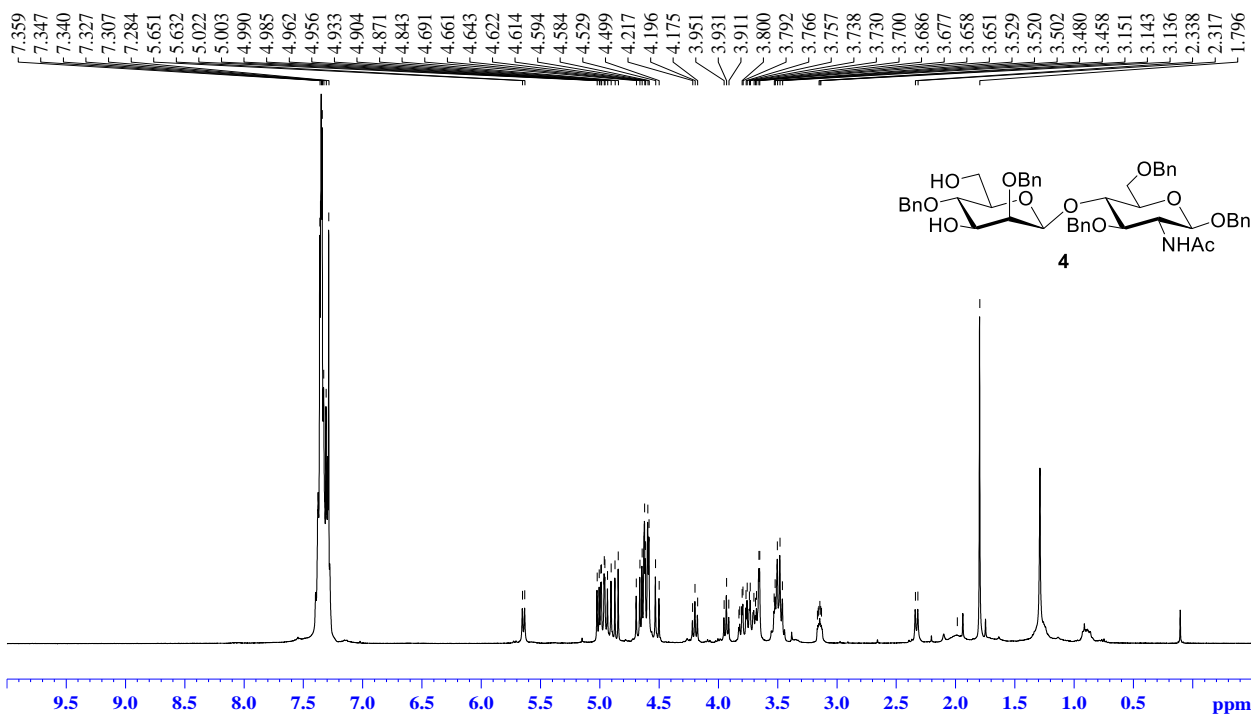

Compound 4: <sup>1</sup>H NMR (CDCl<sub>3</sub>, 400 MHz)

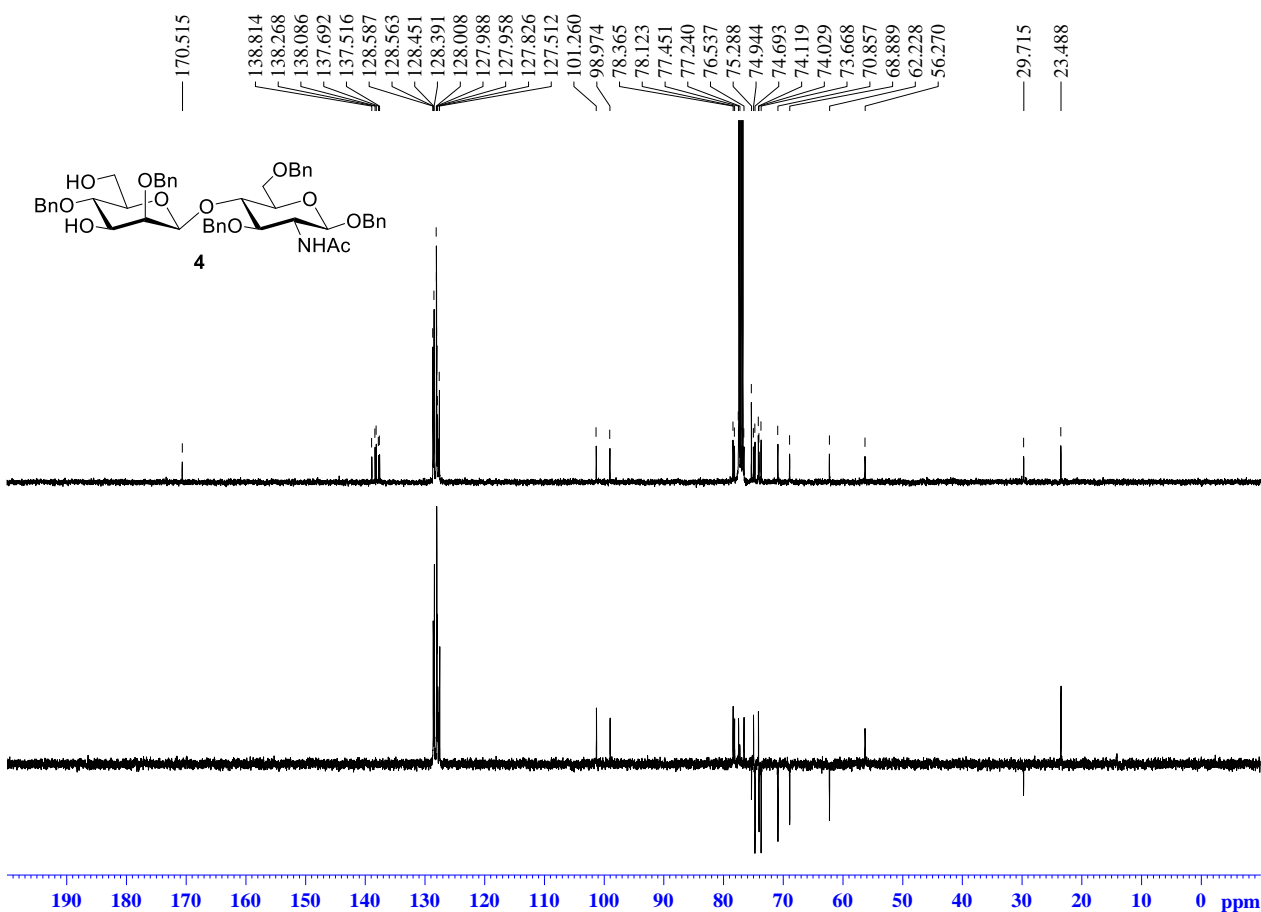

Compound 4: <sup>13</sup>C and Dept-135 NMR (CDCl<sub>3</sub>, 100 MHz)

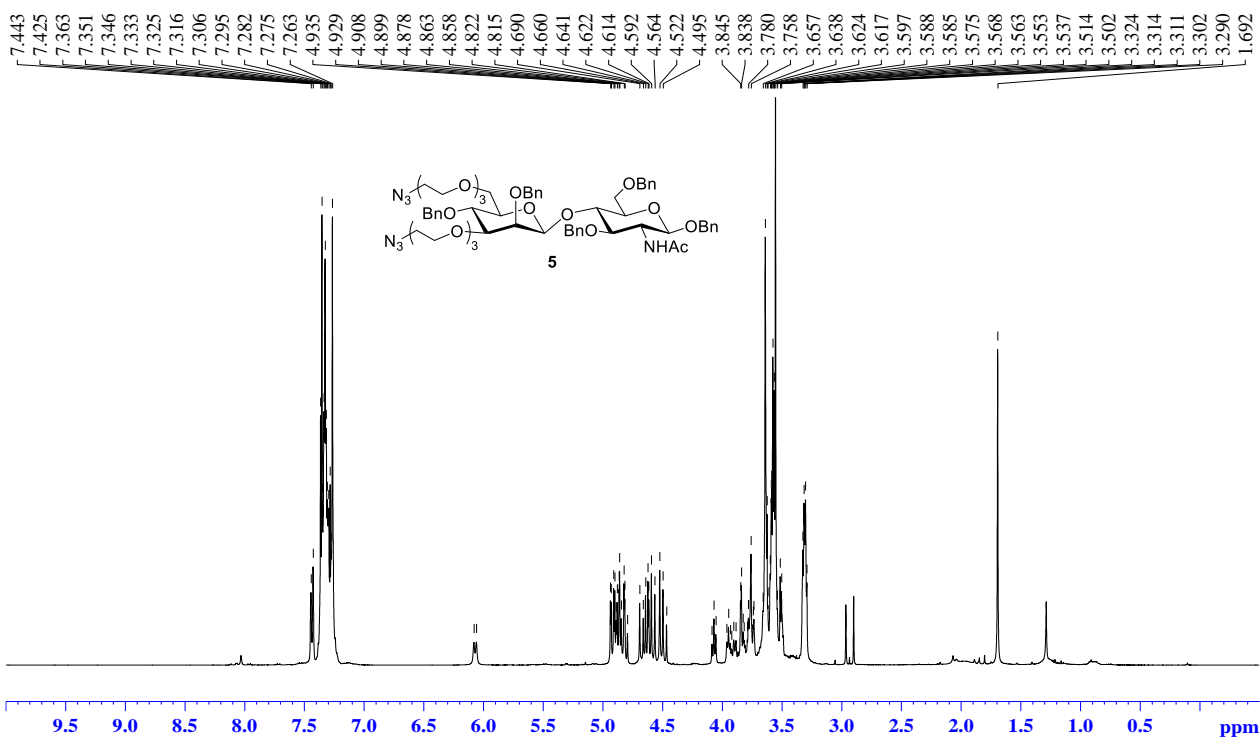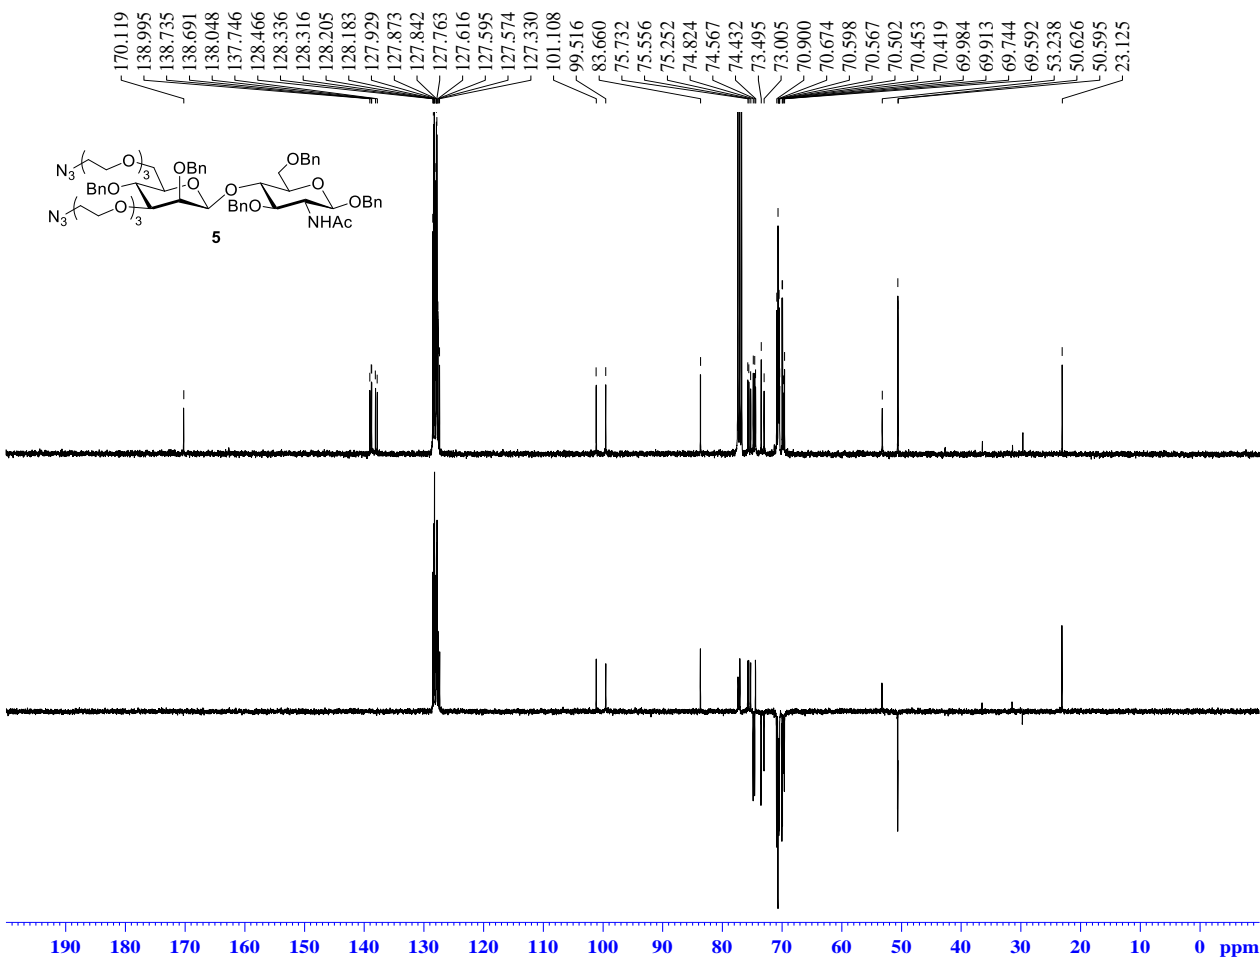

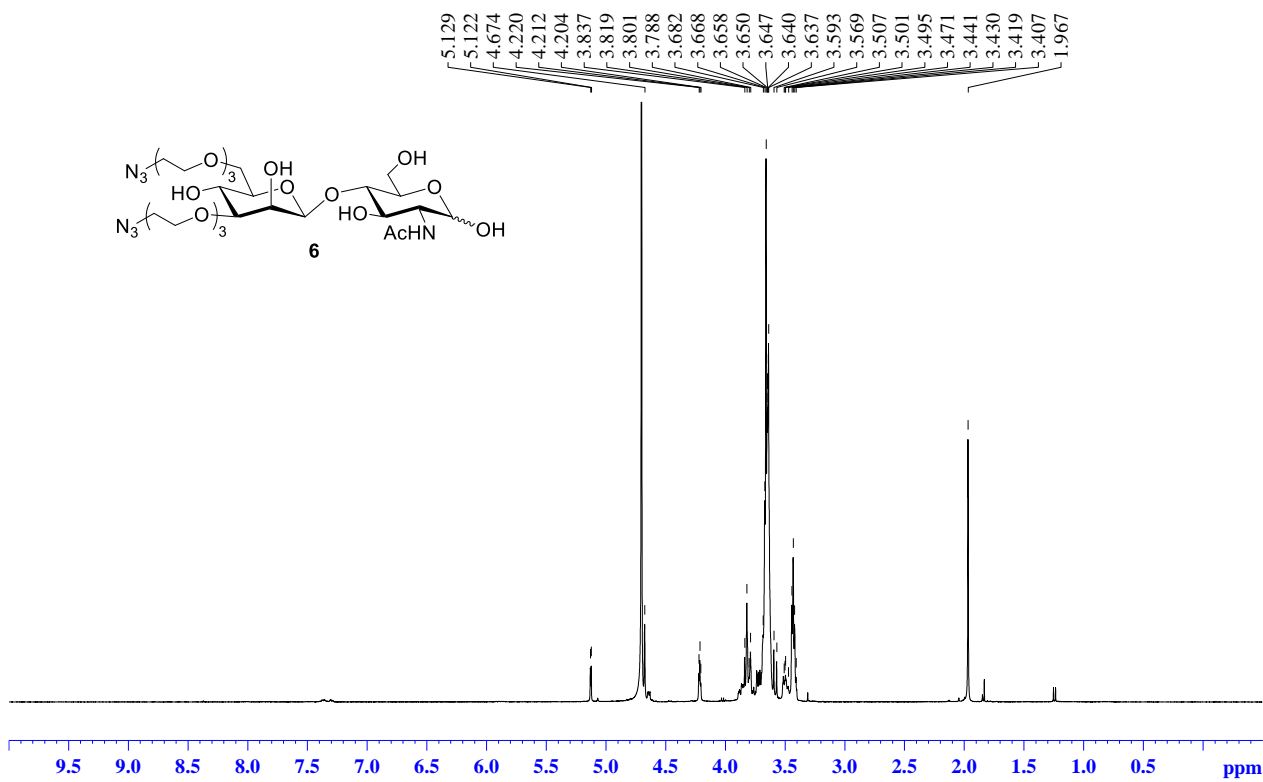

Compound 6: <sup>1</sup>H NMR (D<sub>2</sub>O, 400 MHz)

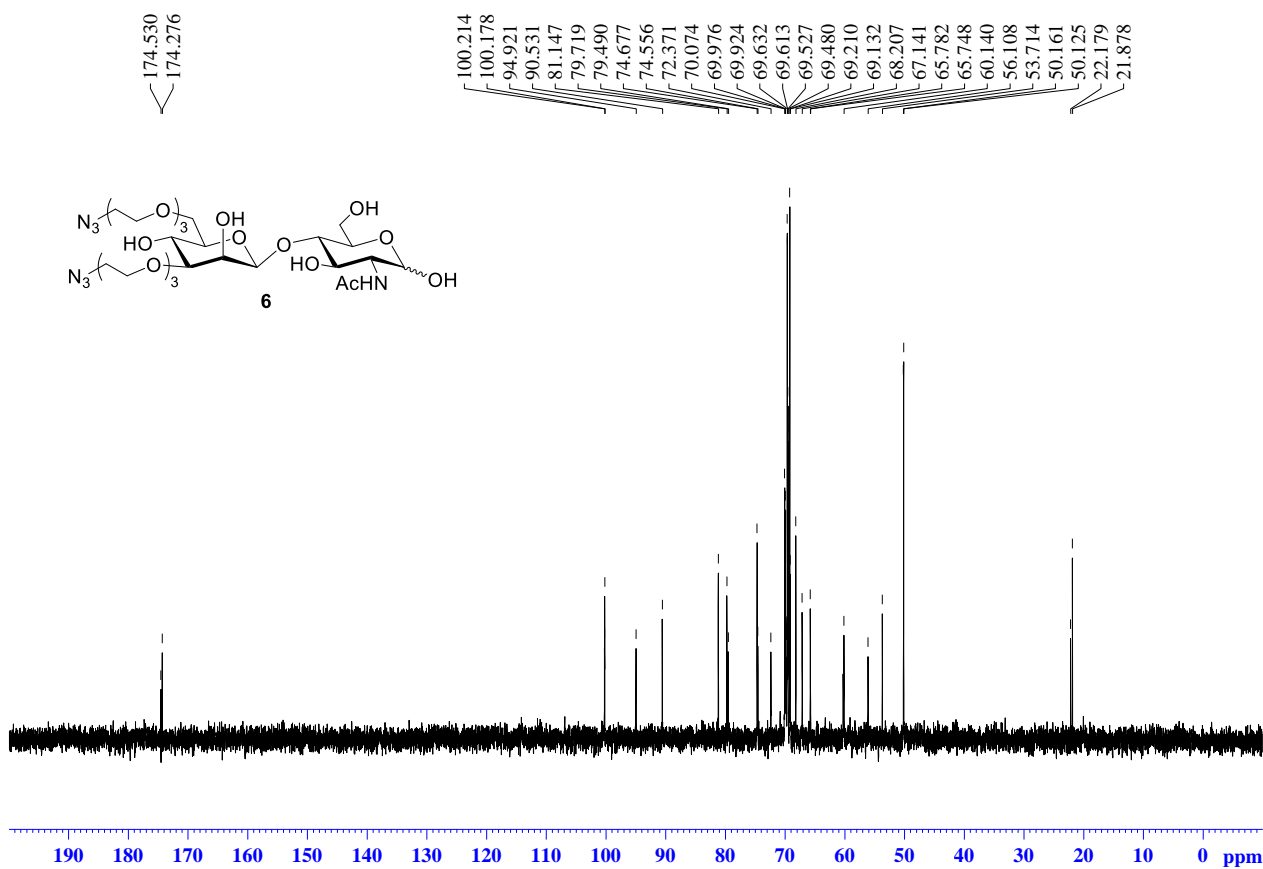

Compound 6: <sup>13</sup>C NMR (D<sub>2</sub>O, 100 MHz)

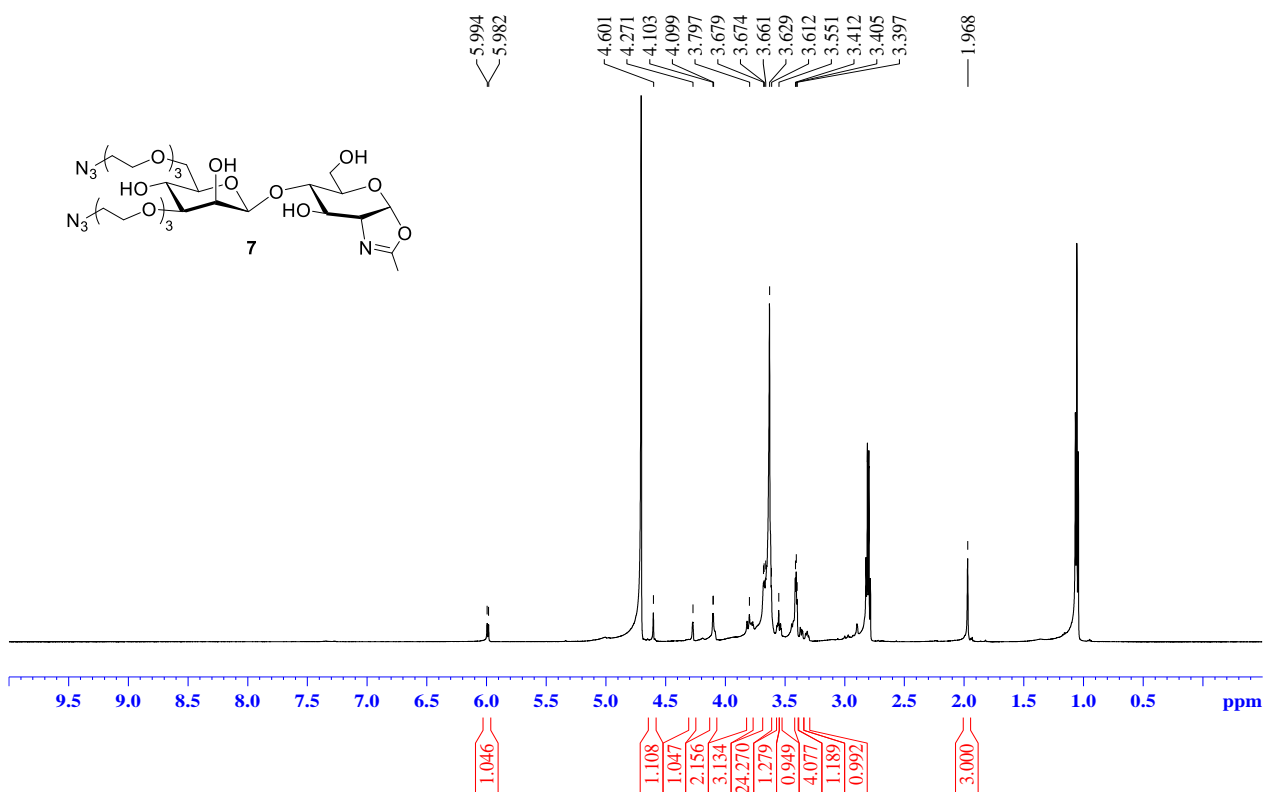

Compound 7: <sup>1</sup>H NMR (D<sub>2</sub>O, 400 MHz)

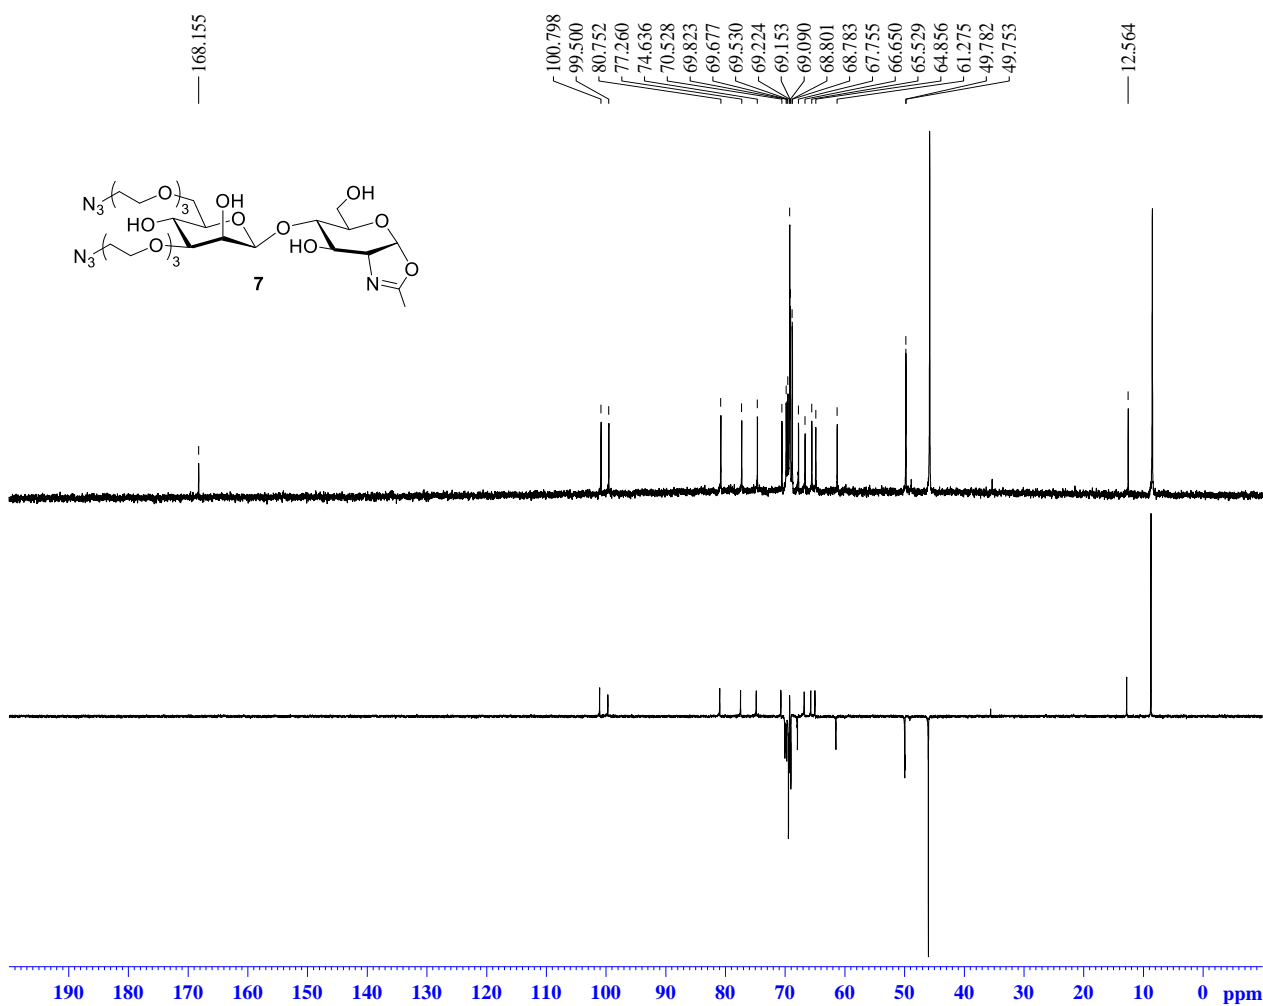

Compound 7: <sup>13</sup>C and Dept-135 NMR (D<sub>2</sub>O, 100 MHz)

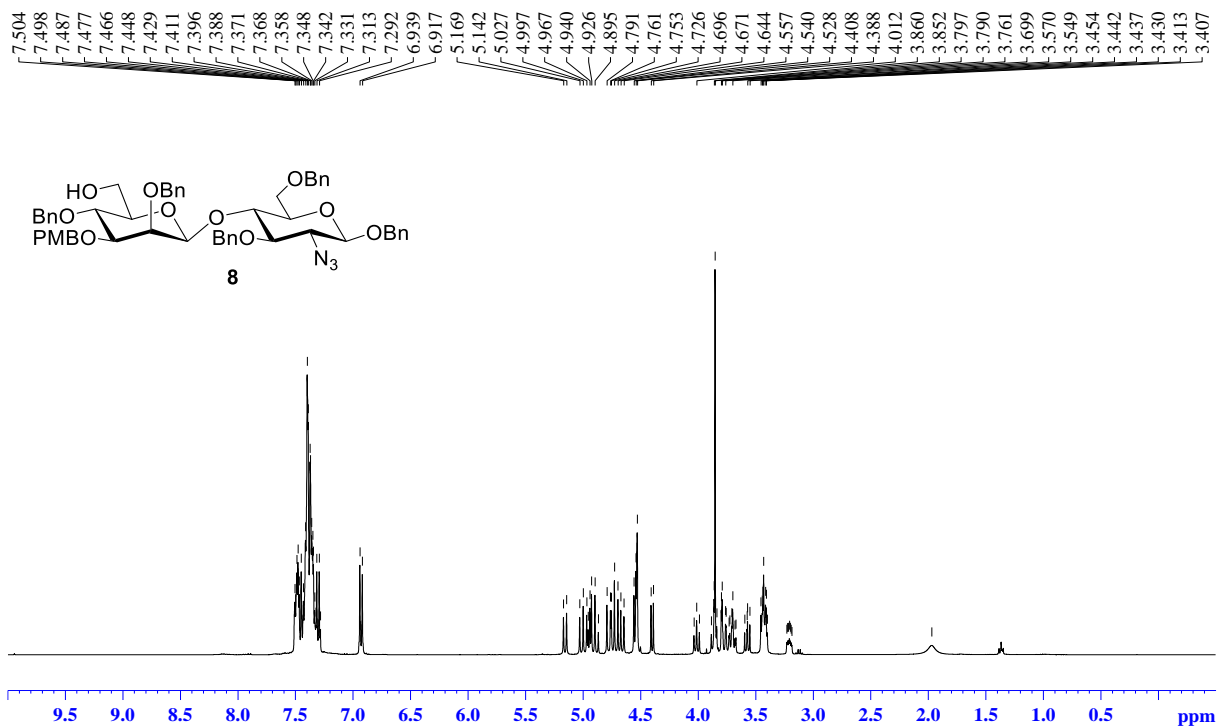

Compound 8: <sup>1</sup>H NMR (CDCl<sub>3</sub>, 400 MHz)

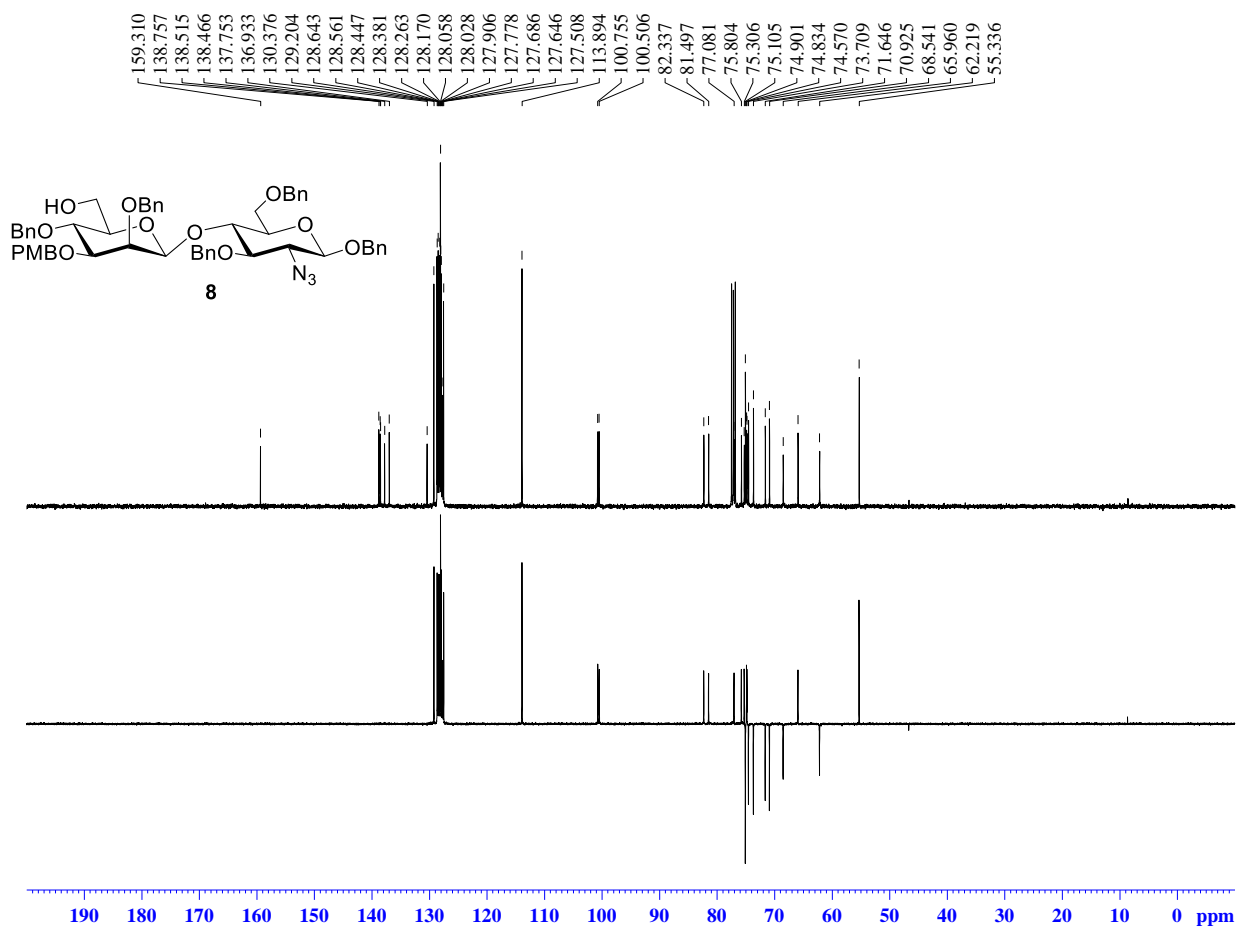

Compound 8: <sup>13</sup>C and Dept-135 NMR (CDCl<sub>3</sub>, 100 MHz)

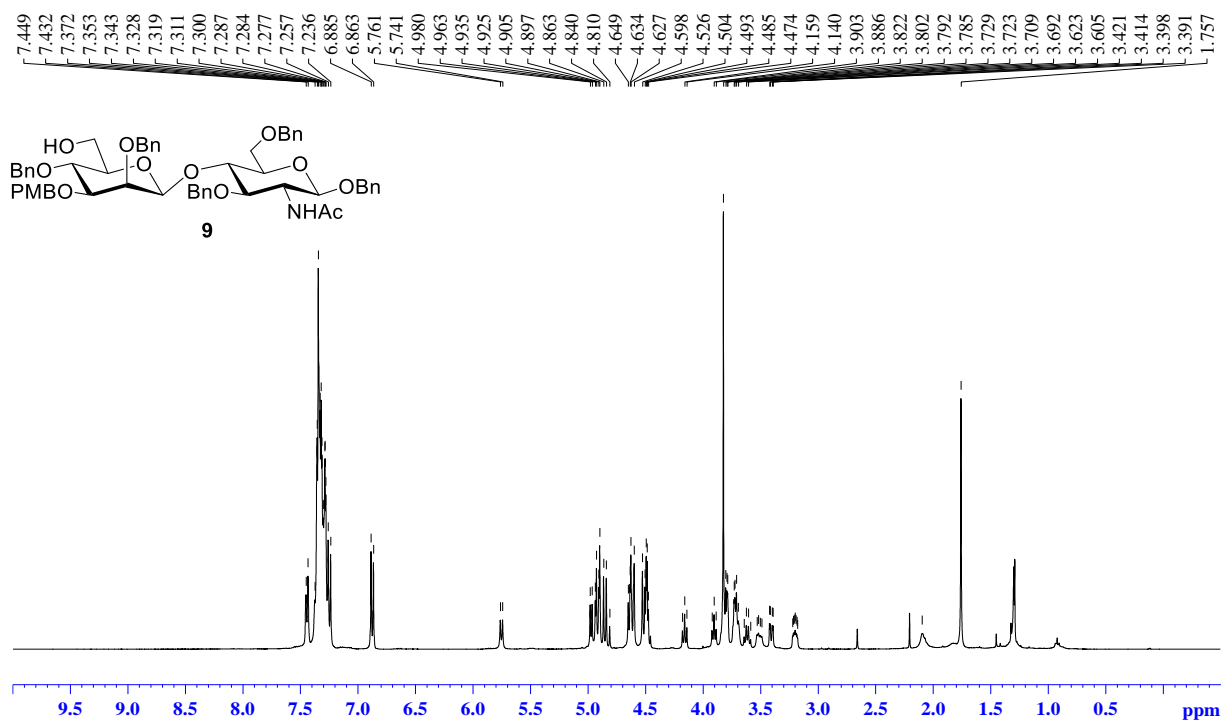

Compound 9:  $^1\text{H}$  NMR ( $\text{CDCl}_3$ , 400 MHz)

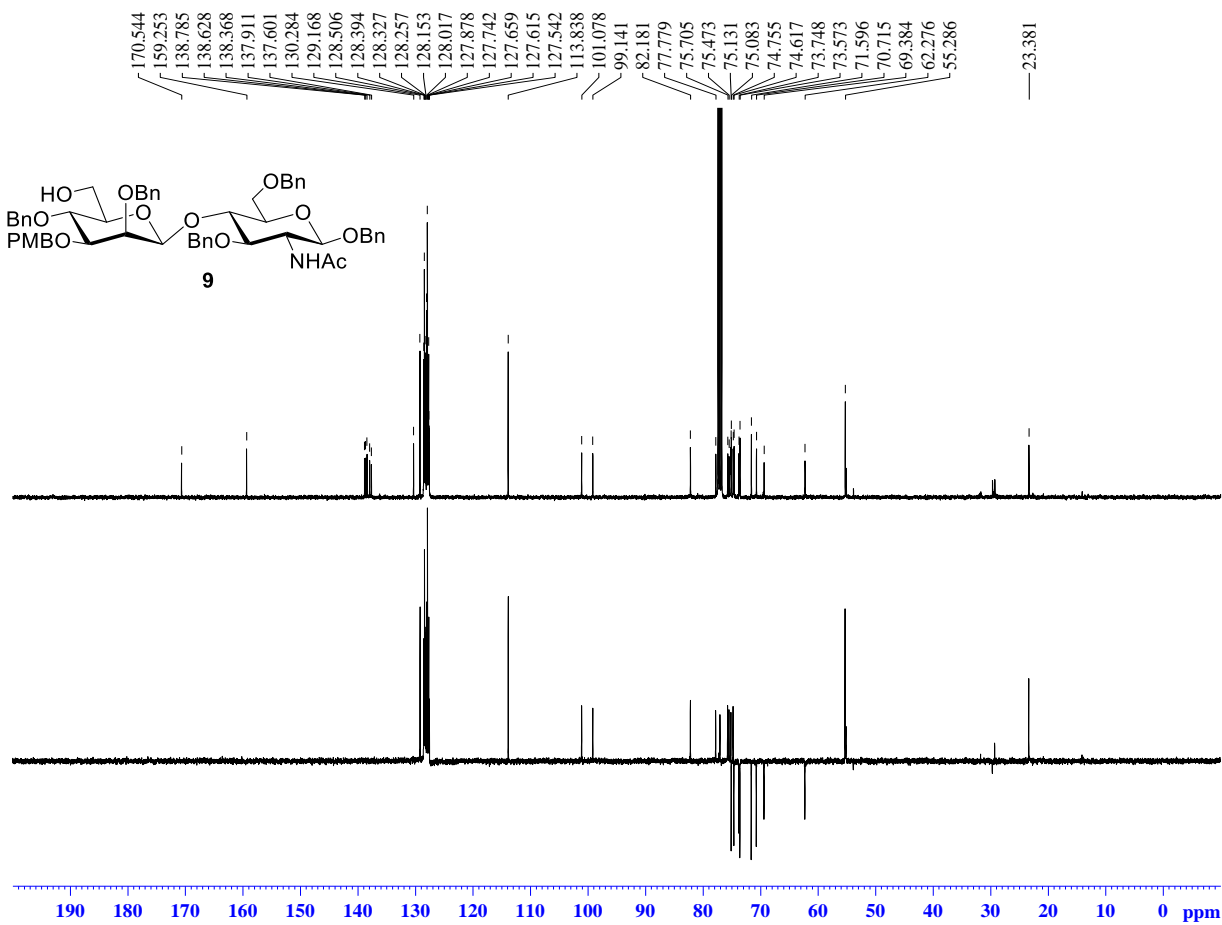

Compound 9:  $^{13}\text{C}$  and Dept- $^{135}\text{C}$  NMR ( $\text{CDCl}_3$ , 100 MHz)

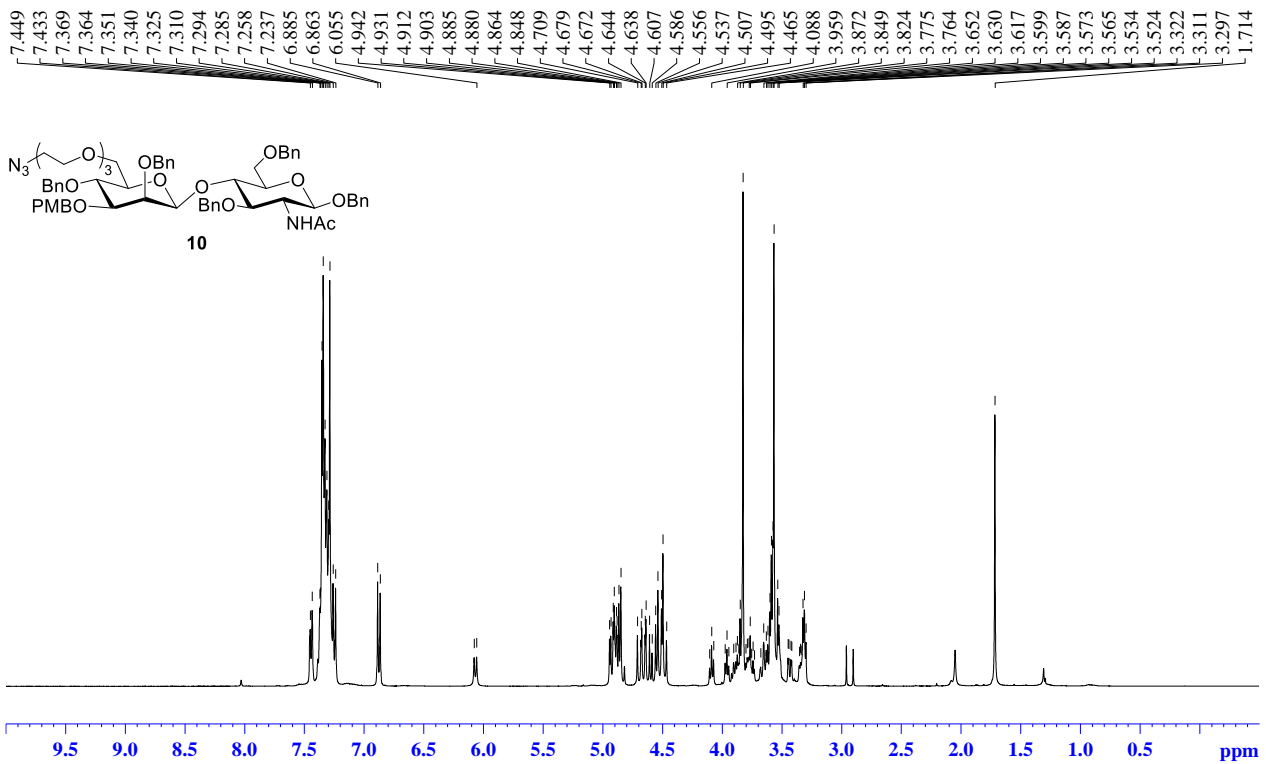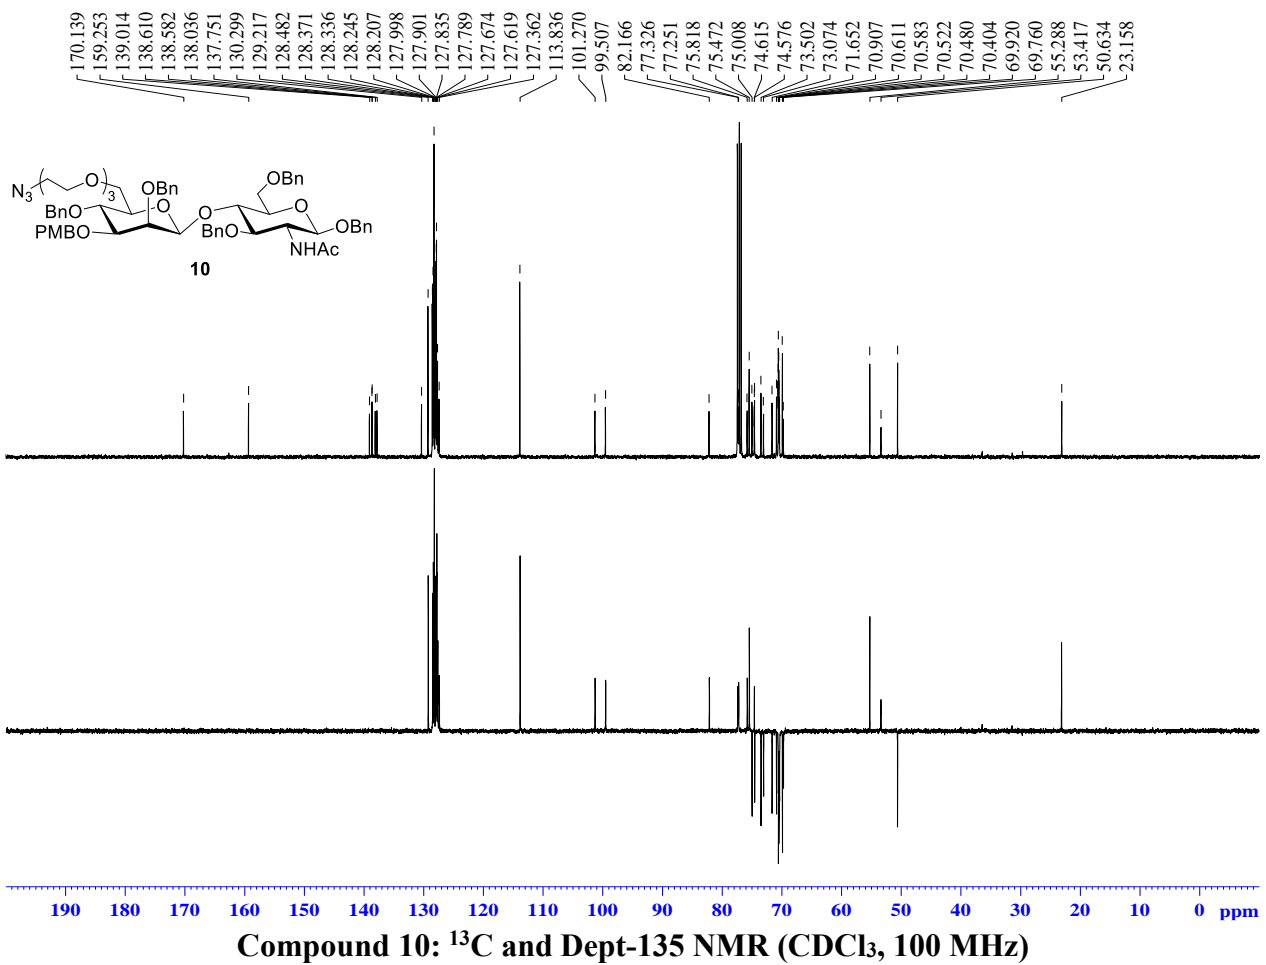

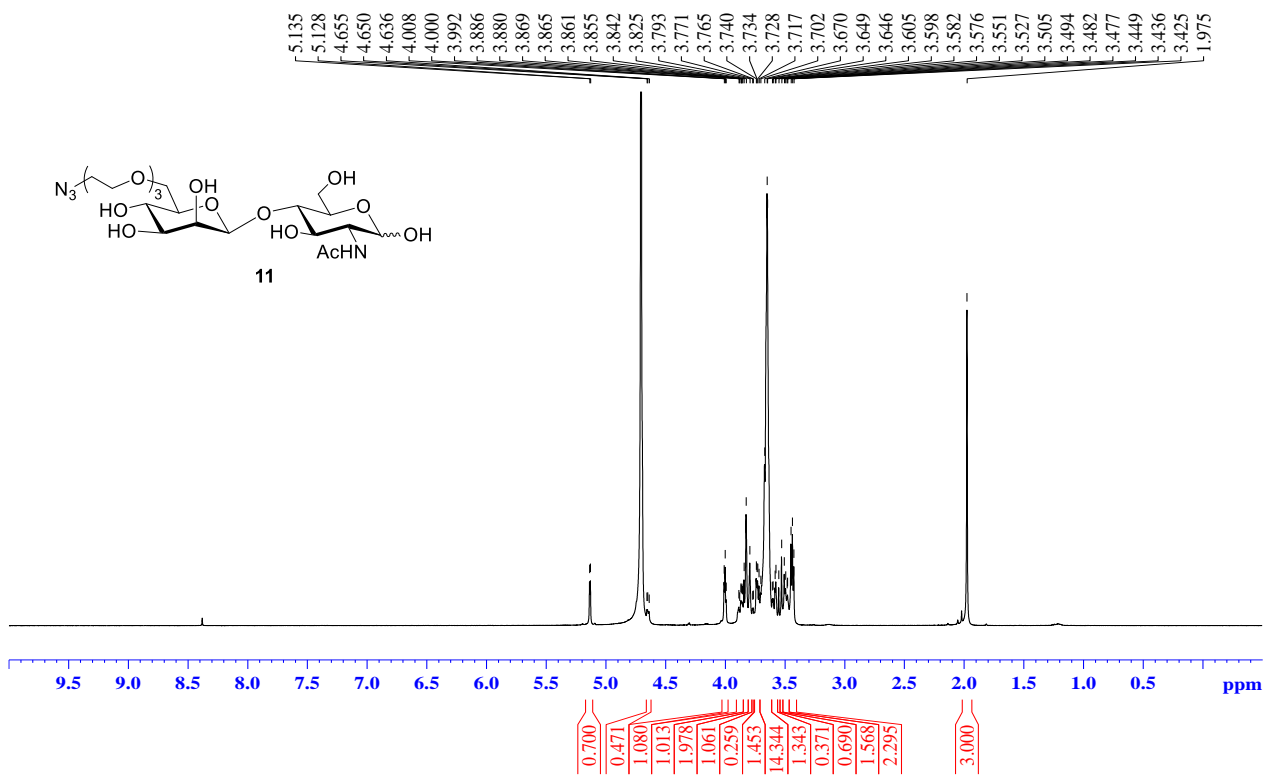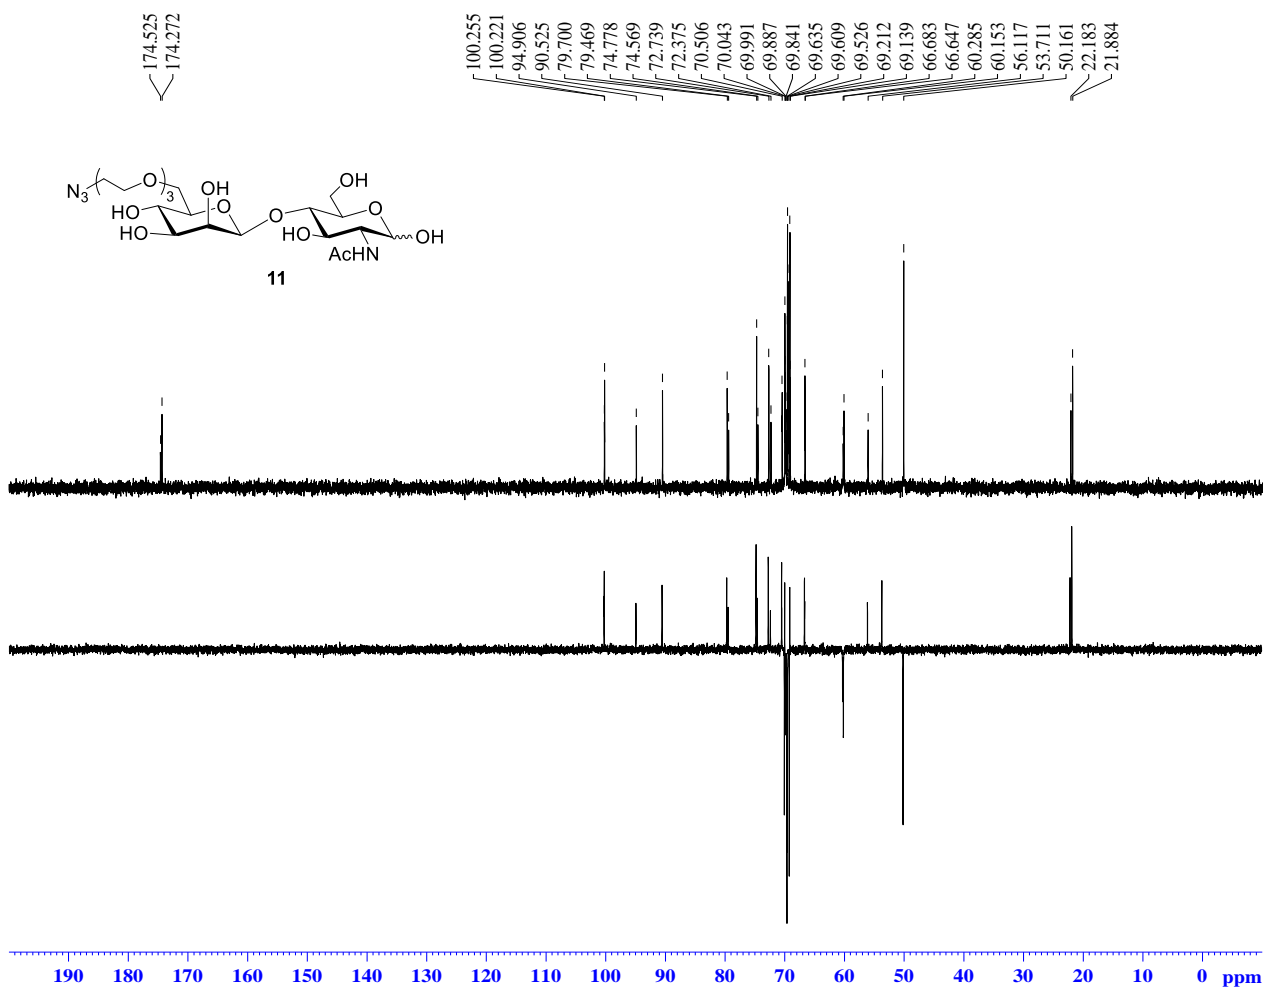



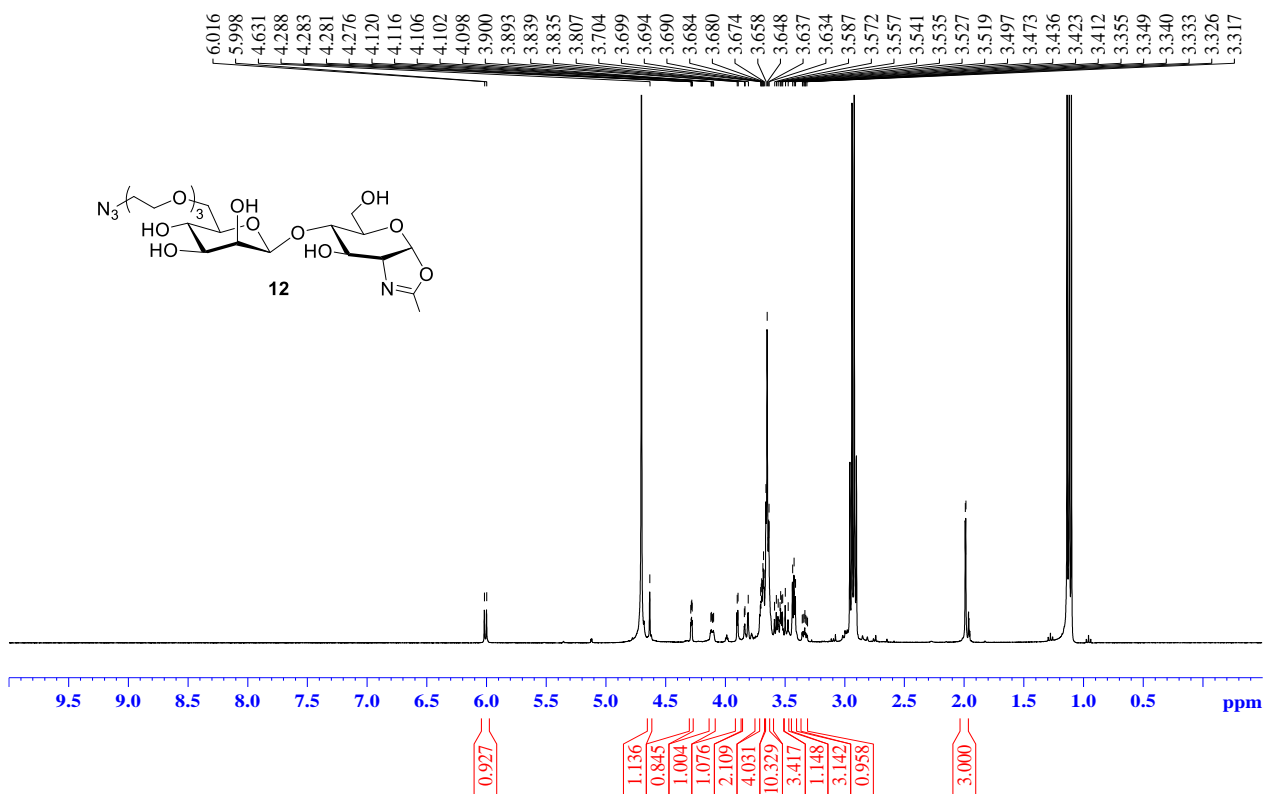

Compound 12:  $^1\text{H}$  NMR ( $\text{D}_2\text{O}$ , 400 MHz)

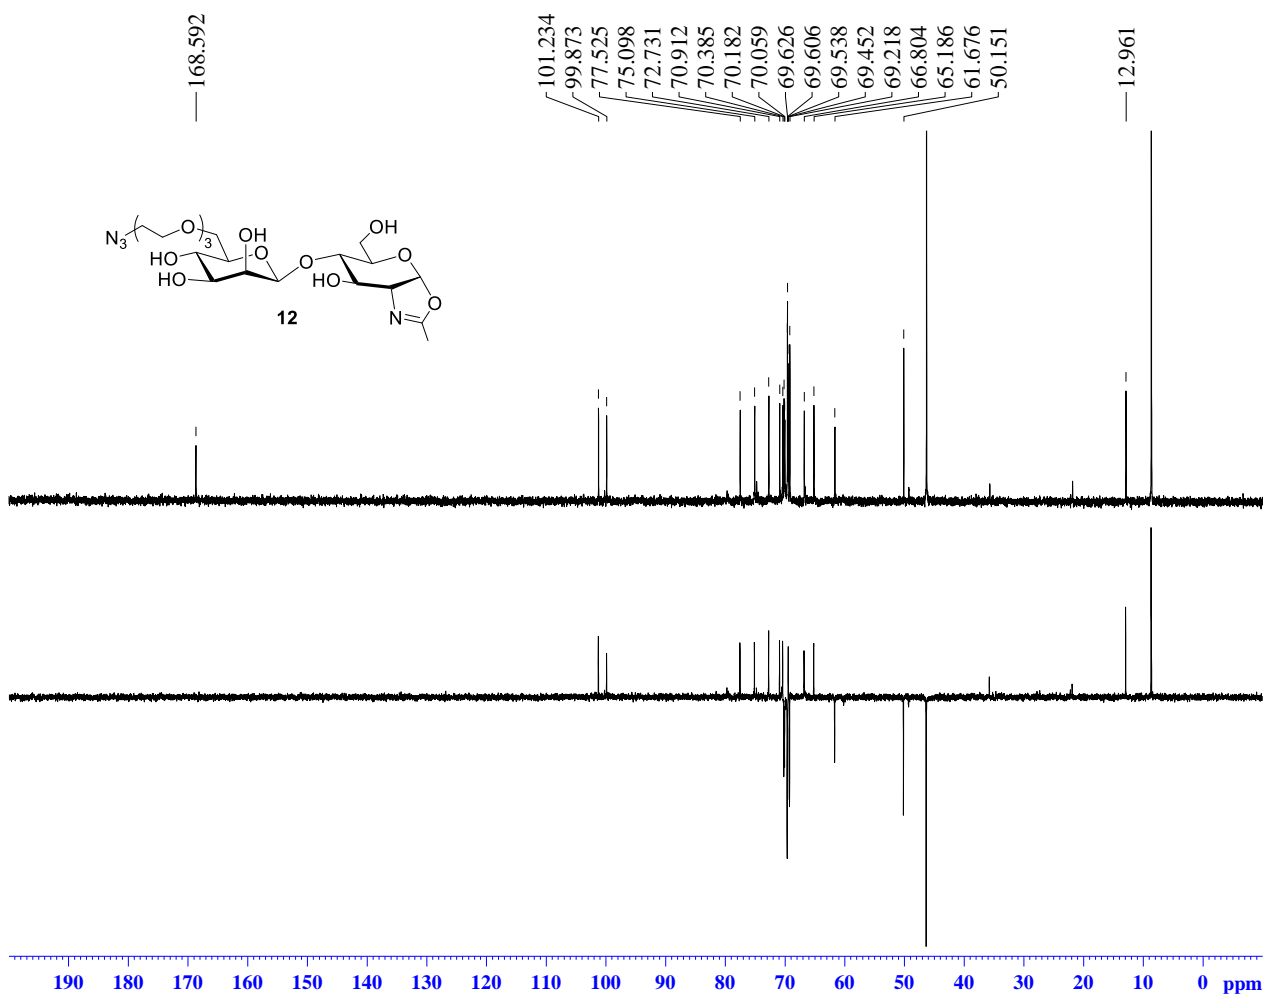

Compound 12:  $^{13}\text{C}$  and Dept- $^{135}\text{C}$  NMR ( $\text{D}_2\text{O}$ , 100 MHz)

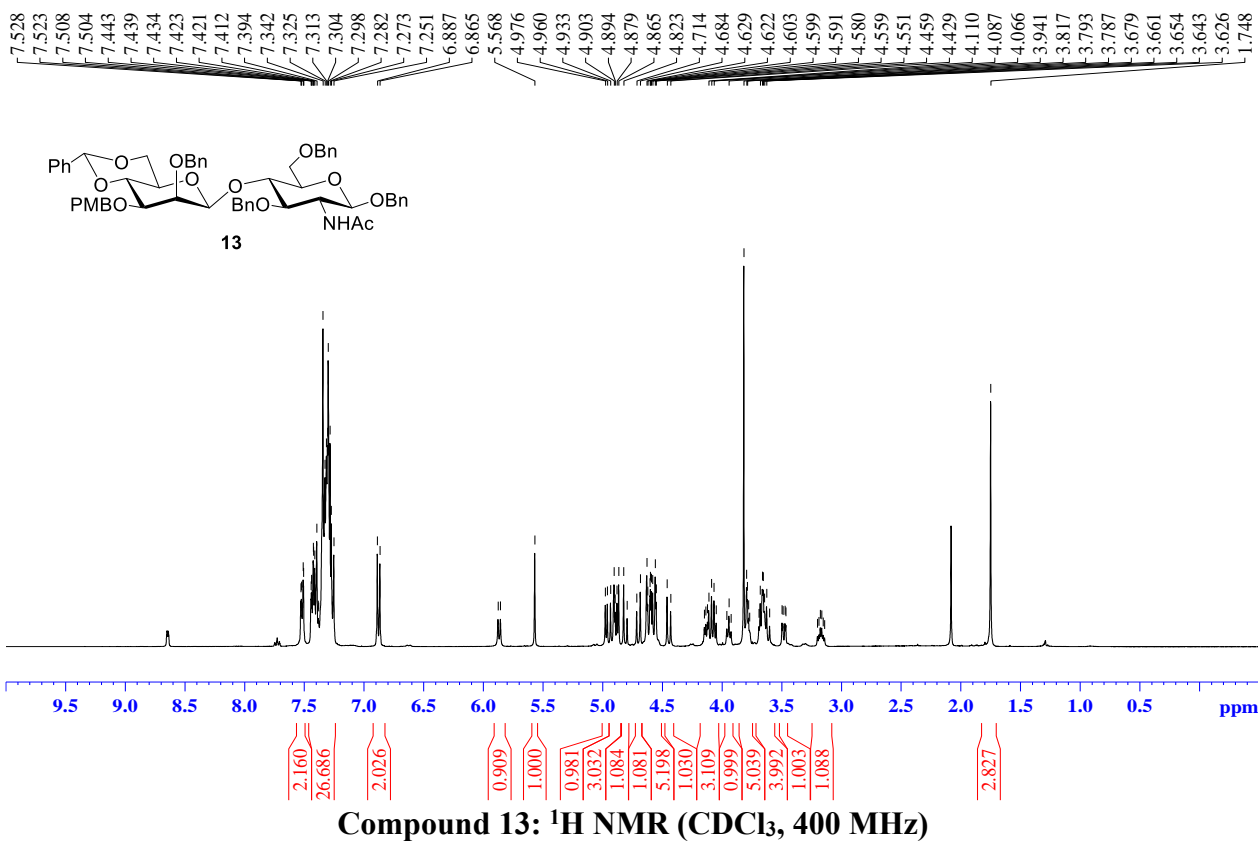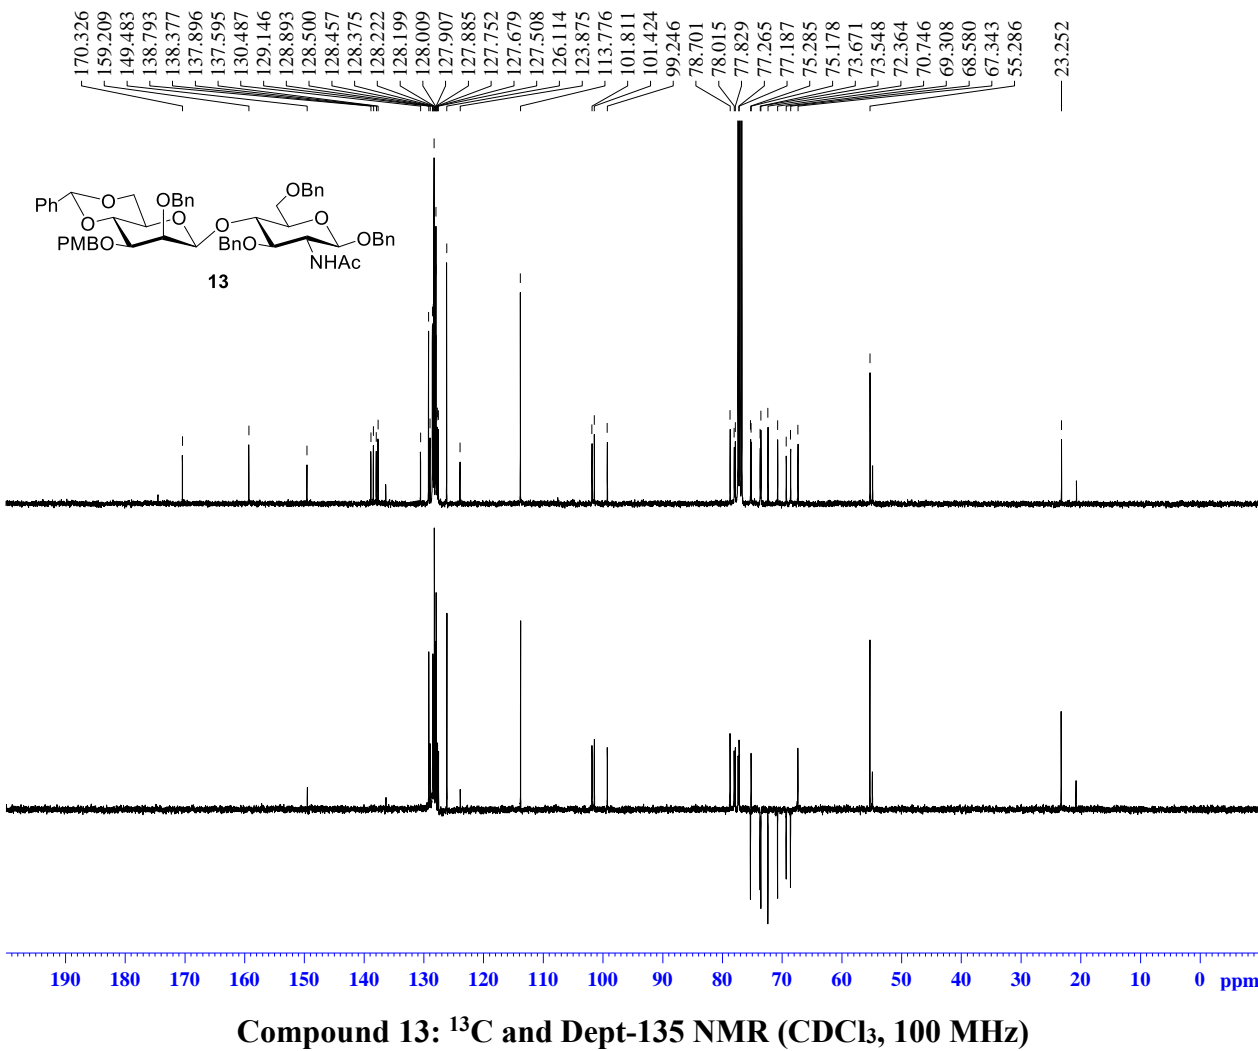

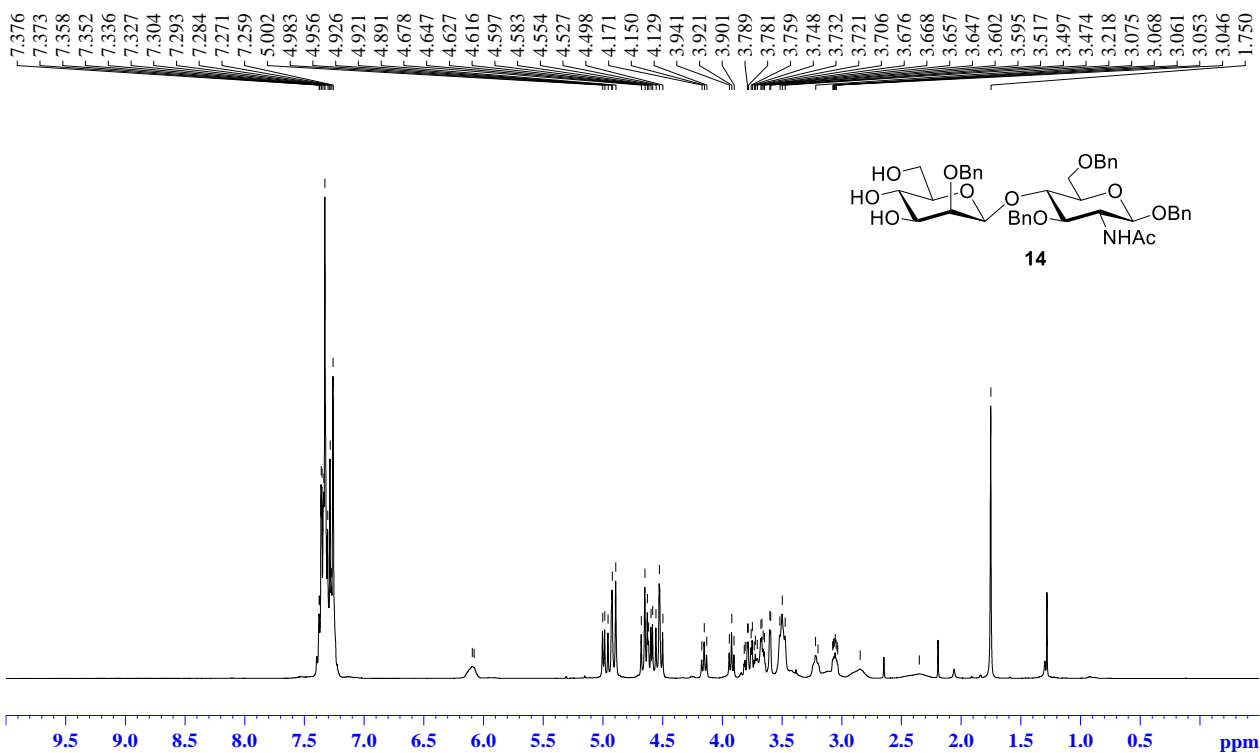

Compound 14:  $^1\text{H}$  NMR ( $\text{CDCl}_3$ , 400 MHz)

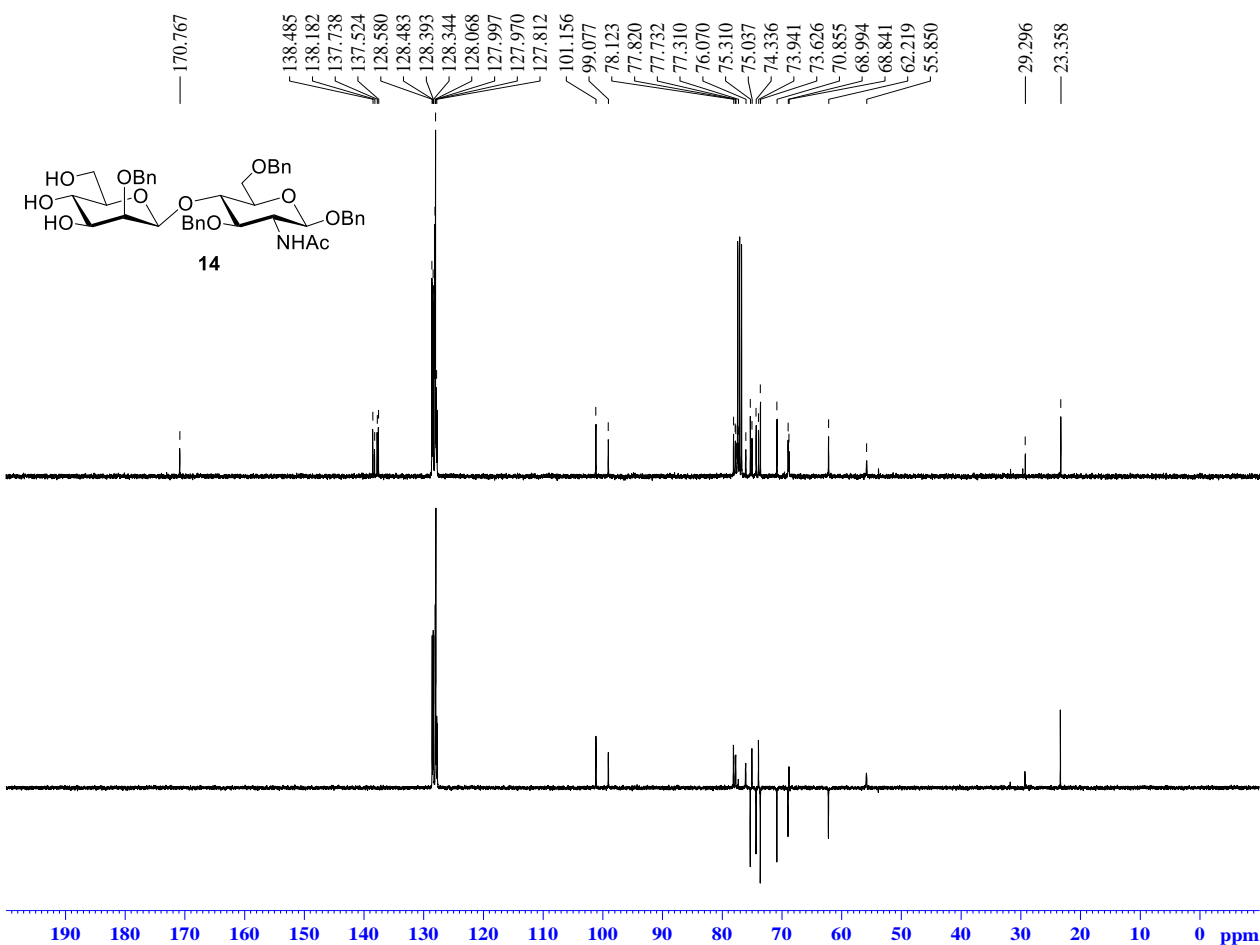

Compound 14:  $^{13}\text{C}$  and Dept- $^{135}\text{C}$  NMR ( $\text{CDCl}_3$ , 100 MHz)

7.415  
7.398  
7.362  
7.354  
7.342  
7.322  
7.311  
7.300  
7.290  
7.284  
7.269  
7.266  
7.254  
4.914  
4.884  
4.848  
4.830  
4.801  
4.792  
4.679  
4.649  
4.608  
4.578  
4.548  
4.495  
4.489  
4.040  
3.805  
3.752  
3.740  
3.722  
3.712  
3.687  
3.675  
3.656  
3.641  
3.634  
3.616  
3.604  
3.592  
3.580  
3.557  
3.539  
3.533  
3.508  
3.496  
3.399  
3.386  
3.374  
3.346  
3.334  
3.321  
3.254  
3.248  
1.677

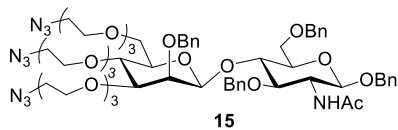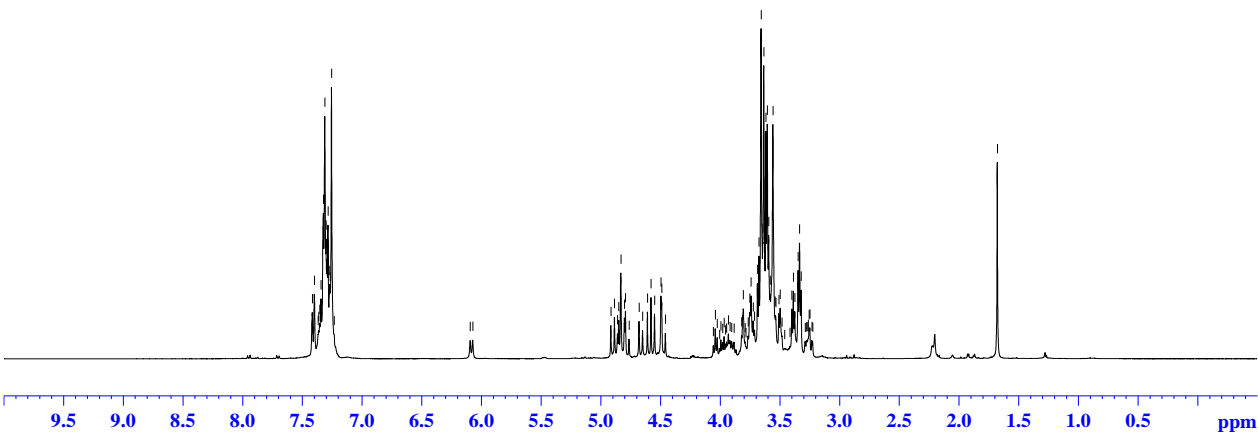

21.645  
0.836  
5.000  
1.027  
2.222  
1.990  
4.139  
5.832  
30.042  
2.051  
2.169  
4.061  
2.108  
2.680

Compound 15: <sup>1</sup>H NMR (CDCl<sub>3</sub>, 400 MHz)

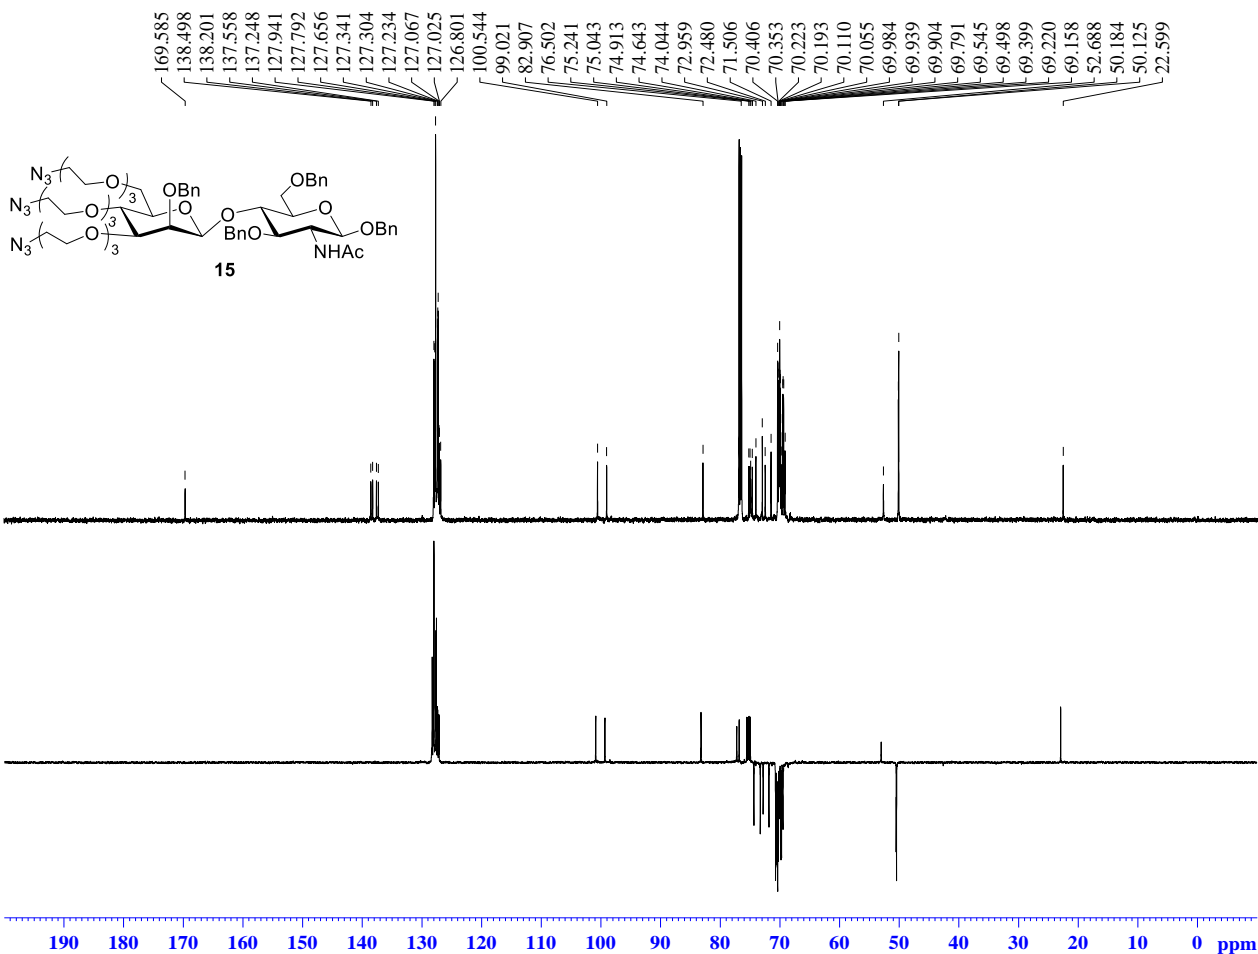

Compound 15: <sup>13</sup>C and Dept-135 NMR (CDCl<sub>3</sub>, 100 MHz)

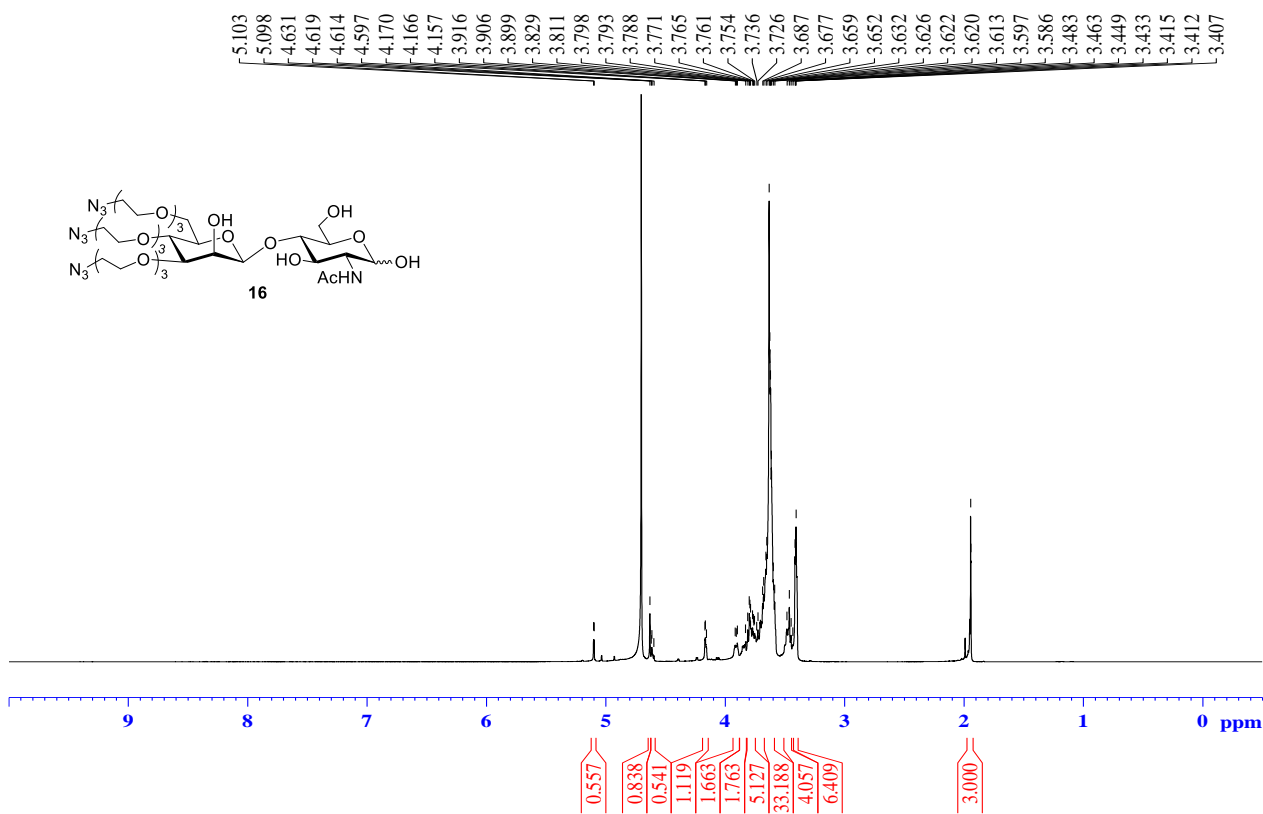

**Compound 16: <sup>1</sup>H NMR (D<sub>2</sub>O, 400 MHz)**

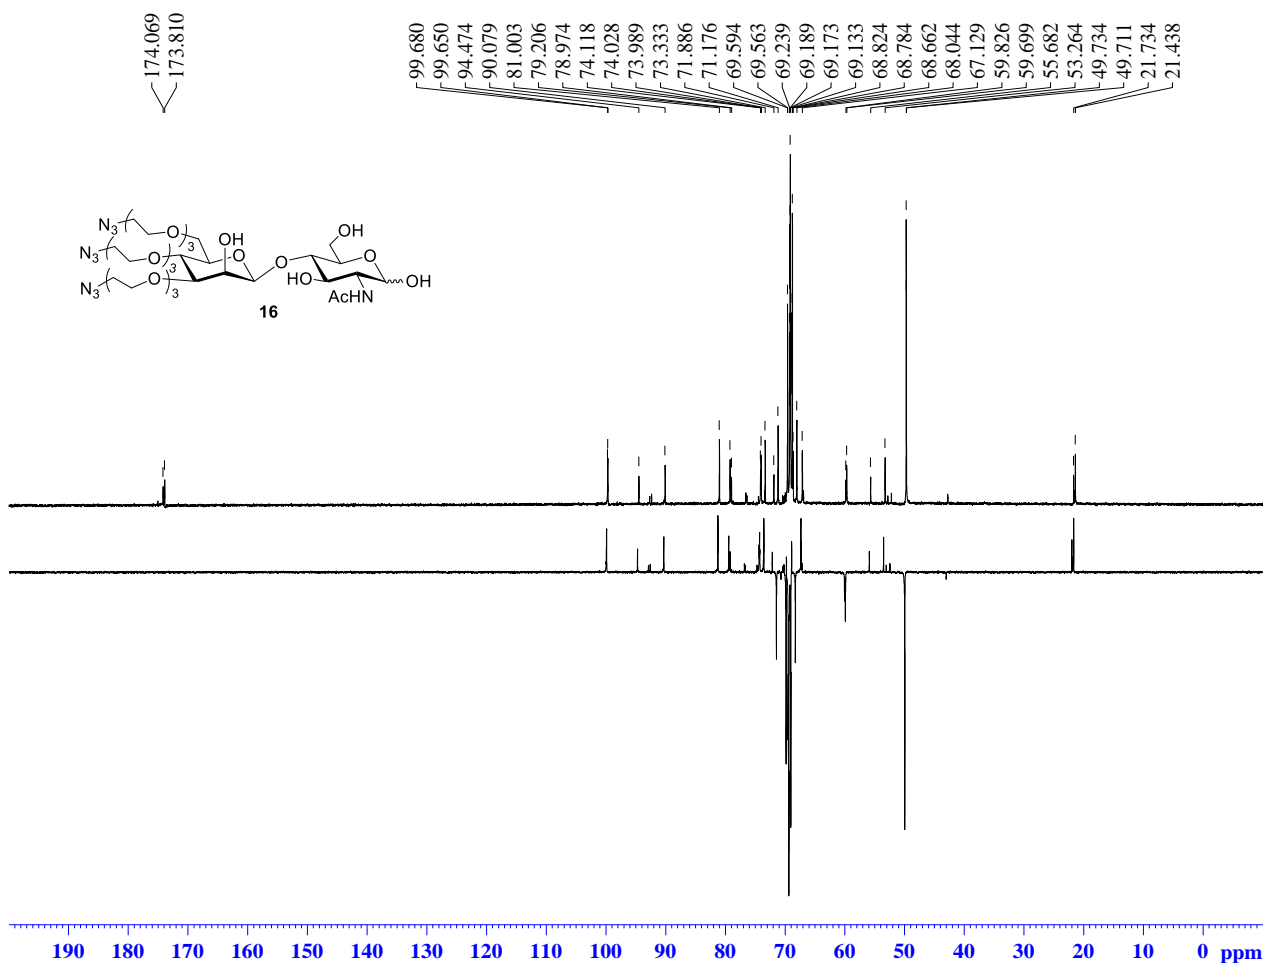

**Compound 16: <sup>13</sup>C and Dept-<sup>135</sup>NMR (D<sub>2</sub>O, 100 MHz)**

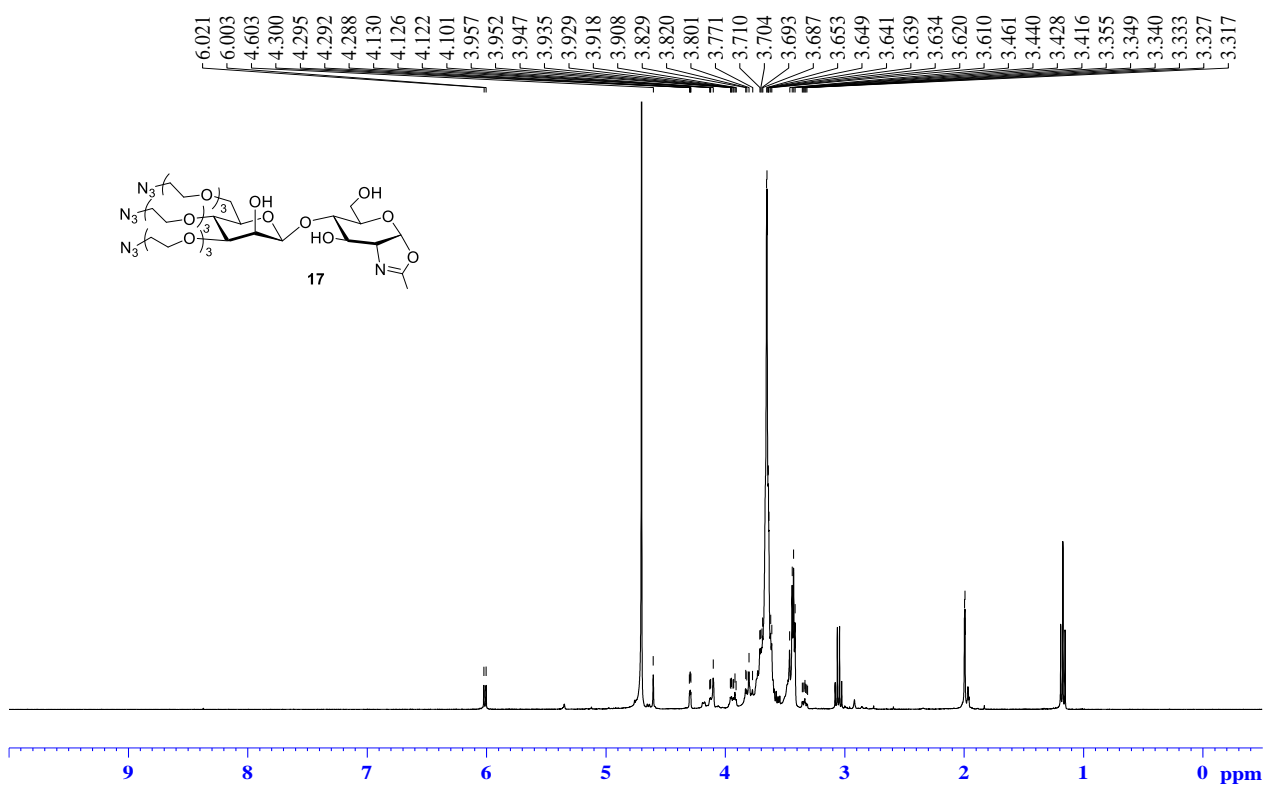

Compound 17: <sup>1</sup>H NMR (D<sub>2</sub>O, 400 MHz)

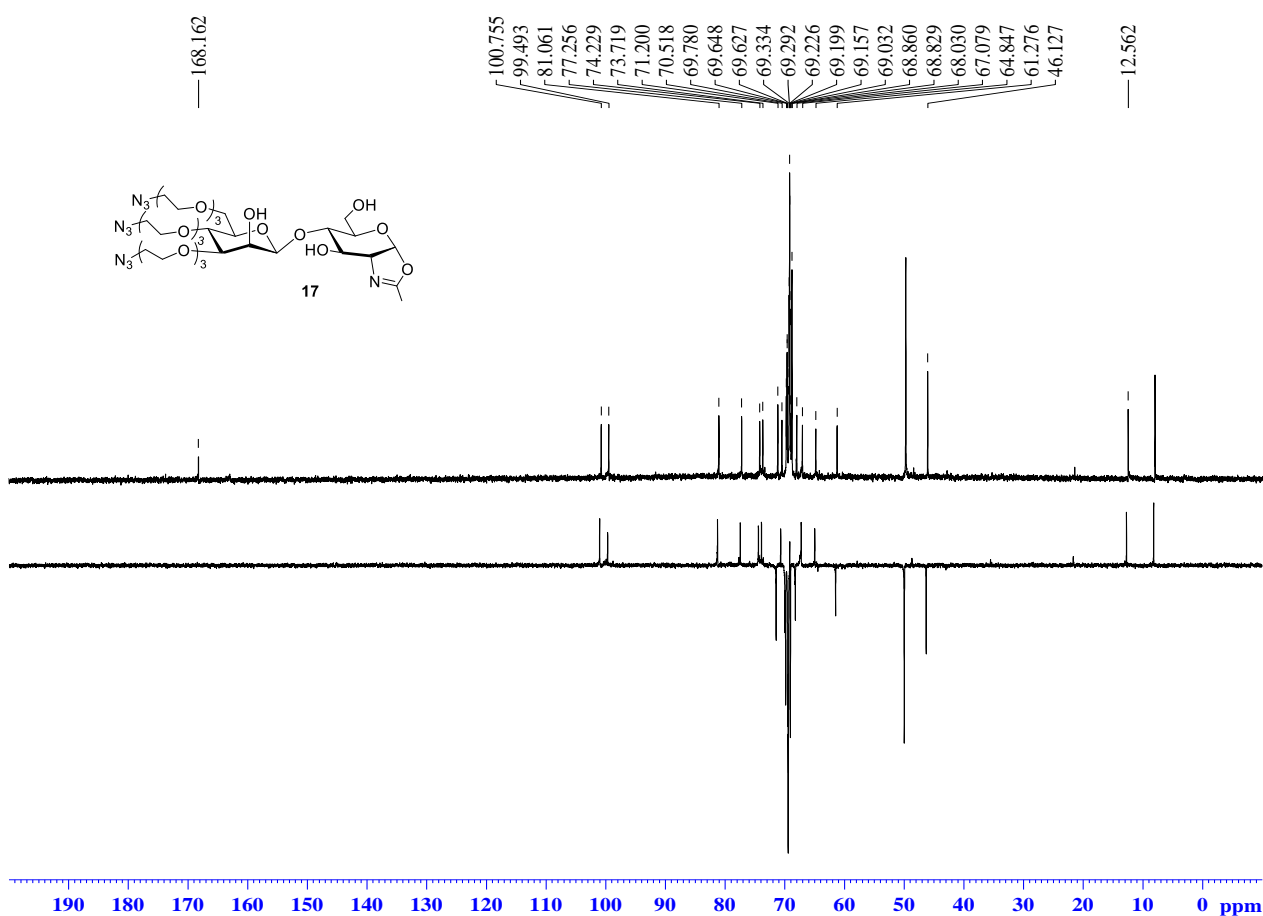

Compound 17: <sup>13</sup>C and Dept-135 NMR (D<sub>2</sub>O, 100 MHz)

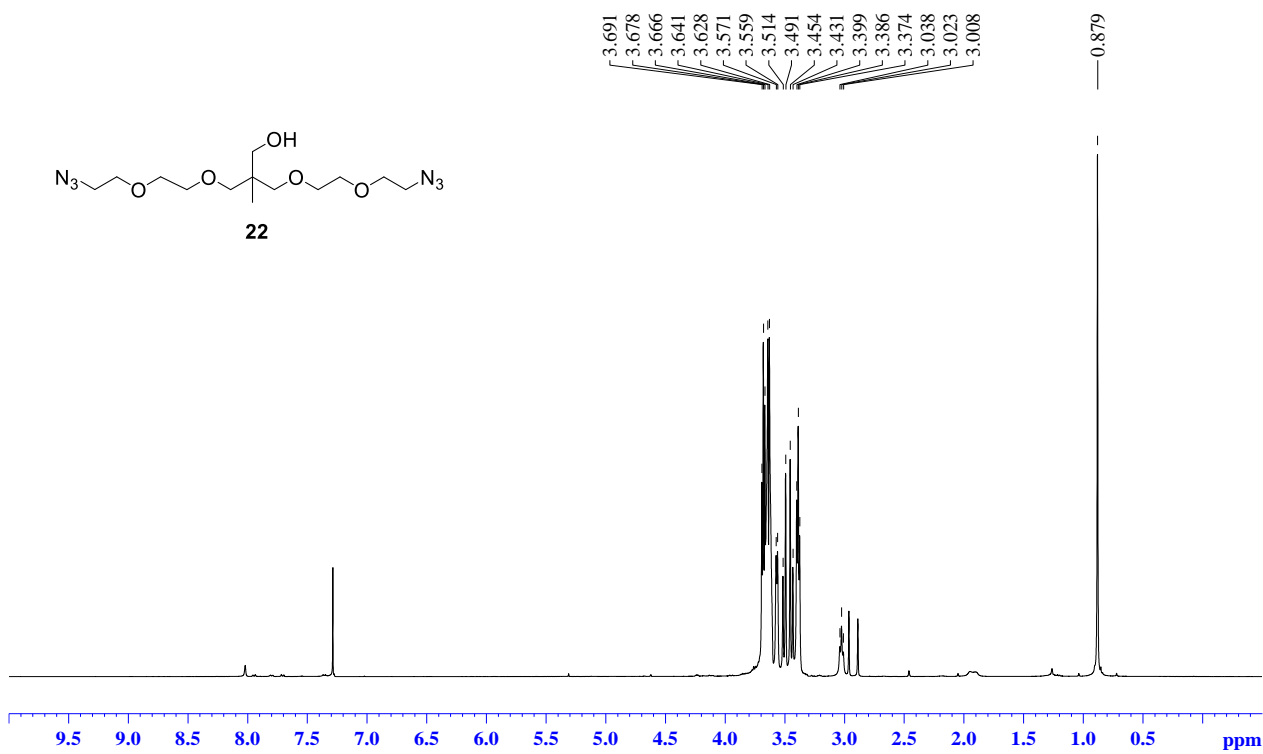

**Compound 22: <sup>1</sup>H NMR (CDCl<sub>3</sub>, 400 MHz)**

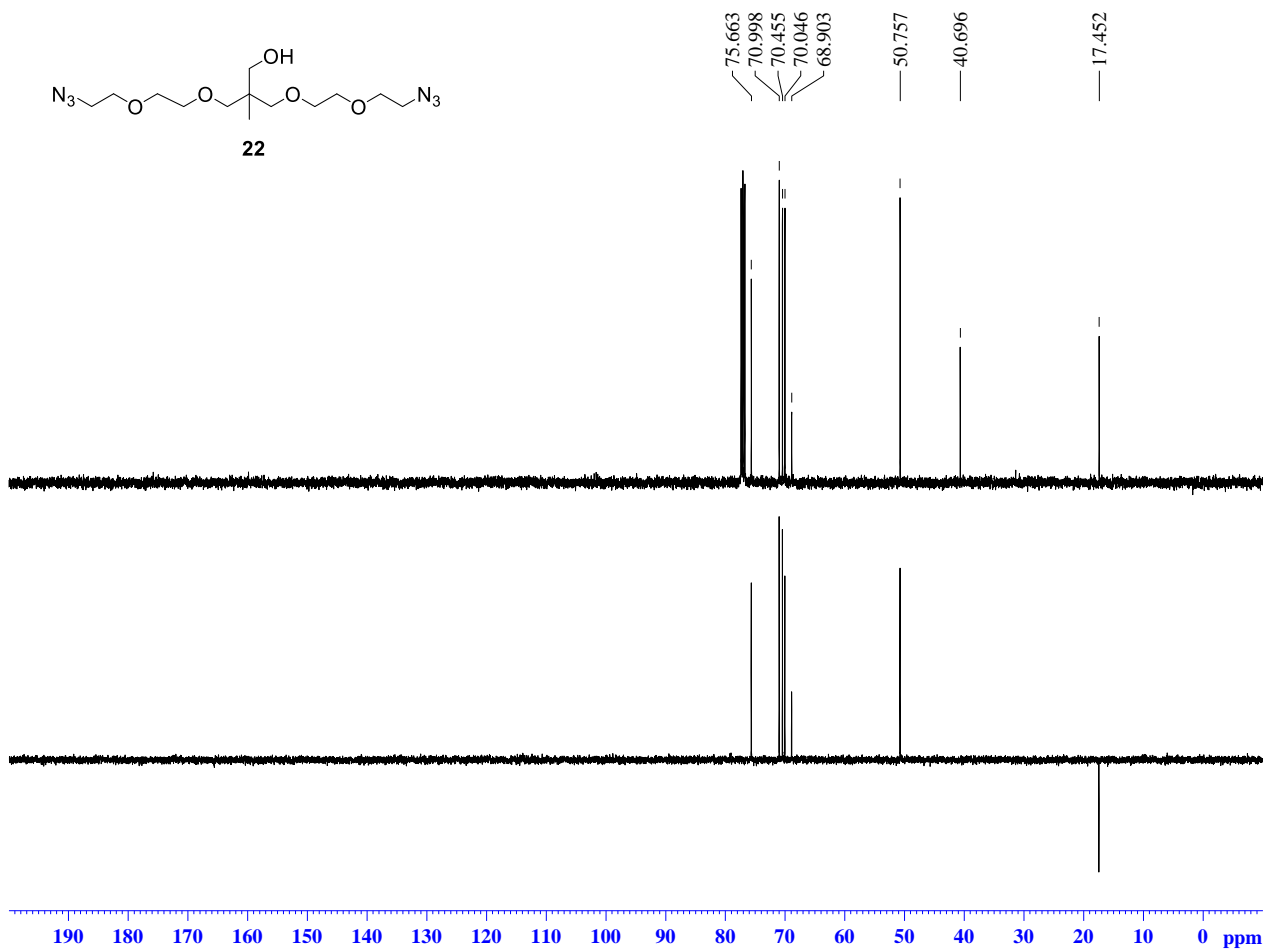

**Compound 22: <sup>13</sup>C and Dept-135 NMR (CDCl<sub>3</sub>, 100 MHz)**

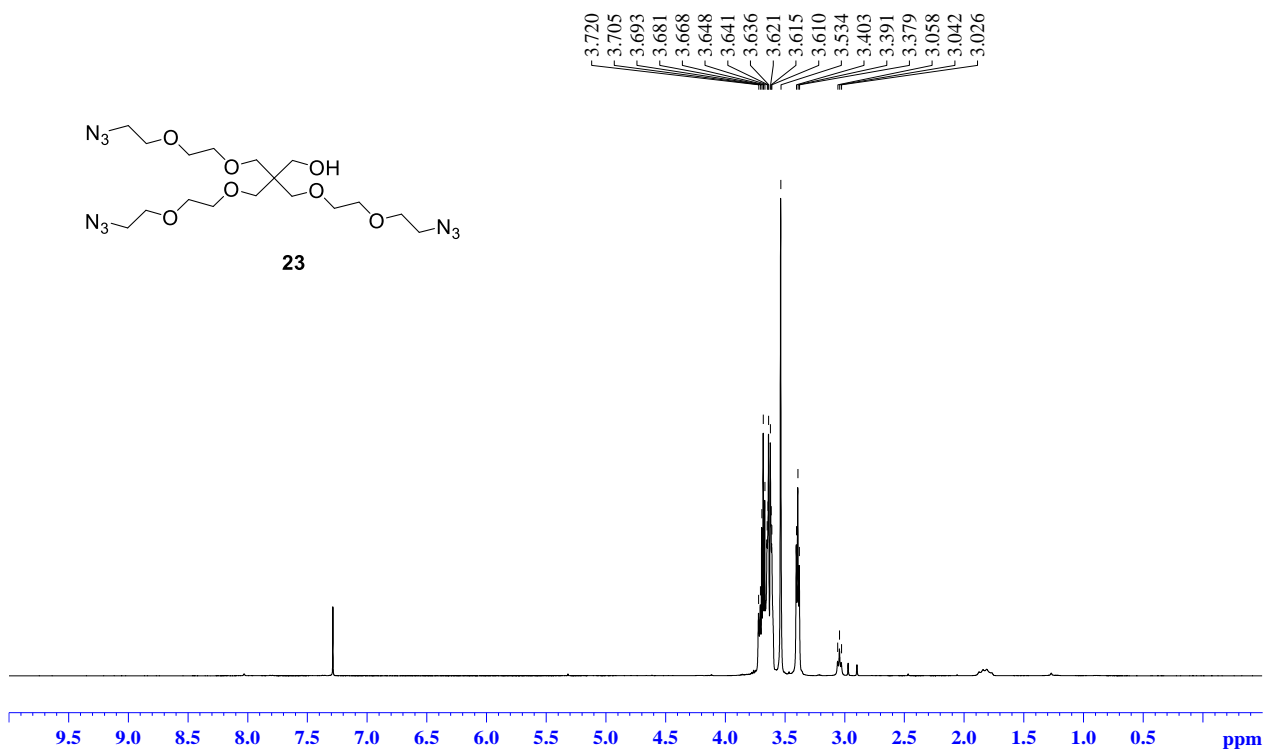

Compound 23: <sup>1</sup>H NMR (CDCl<sub>3</sub>, 400 MHz)

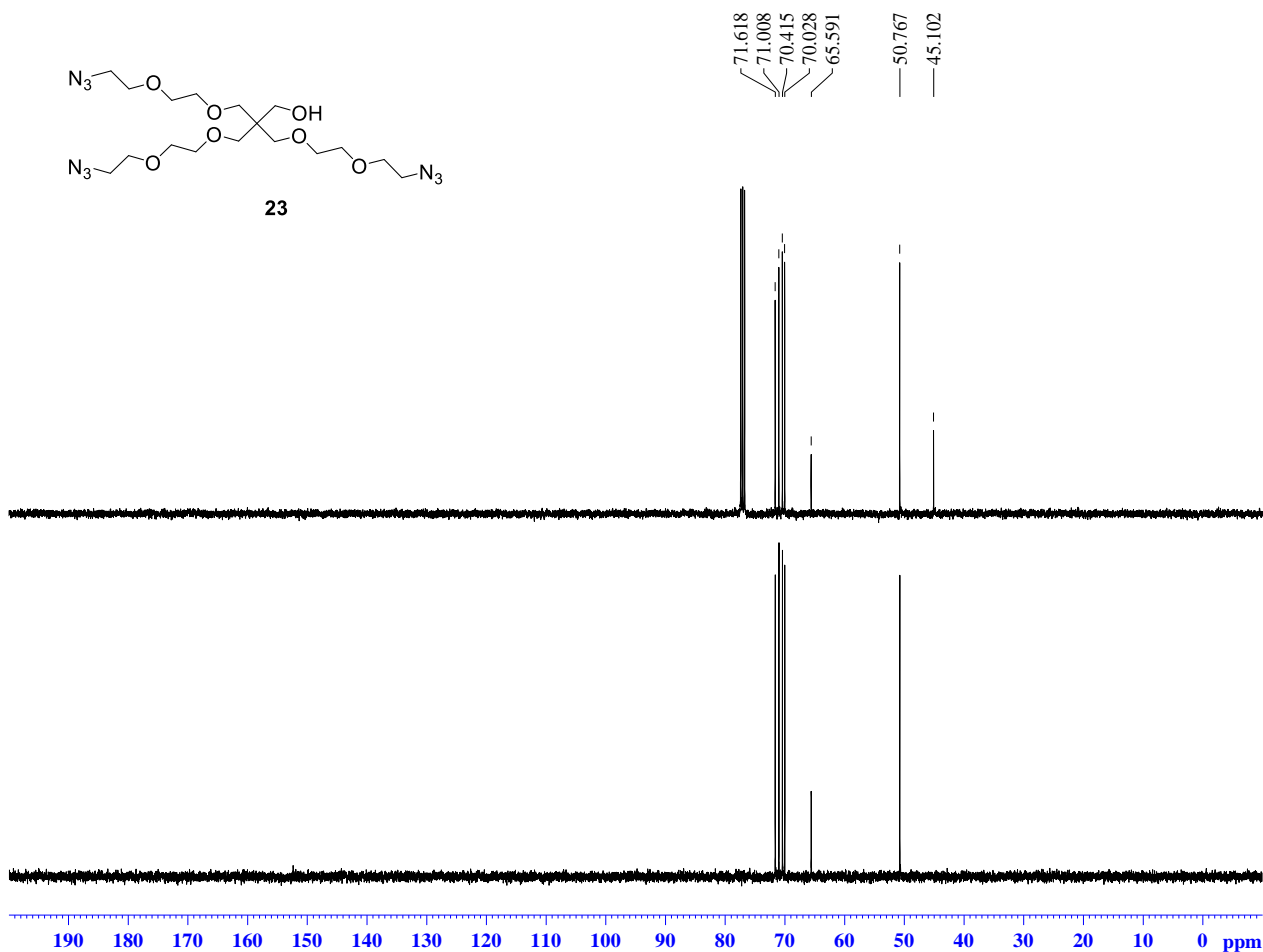

Compound 23: <sup>13</sup>C and Dept-135 NMR (CDCl<sub>3</sub>, 100 MHz)



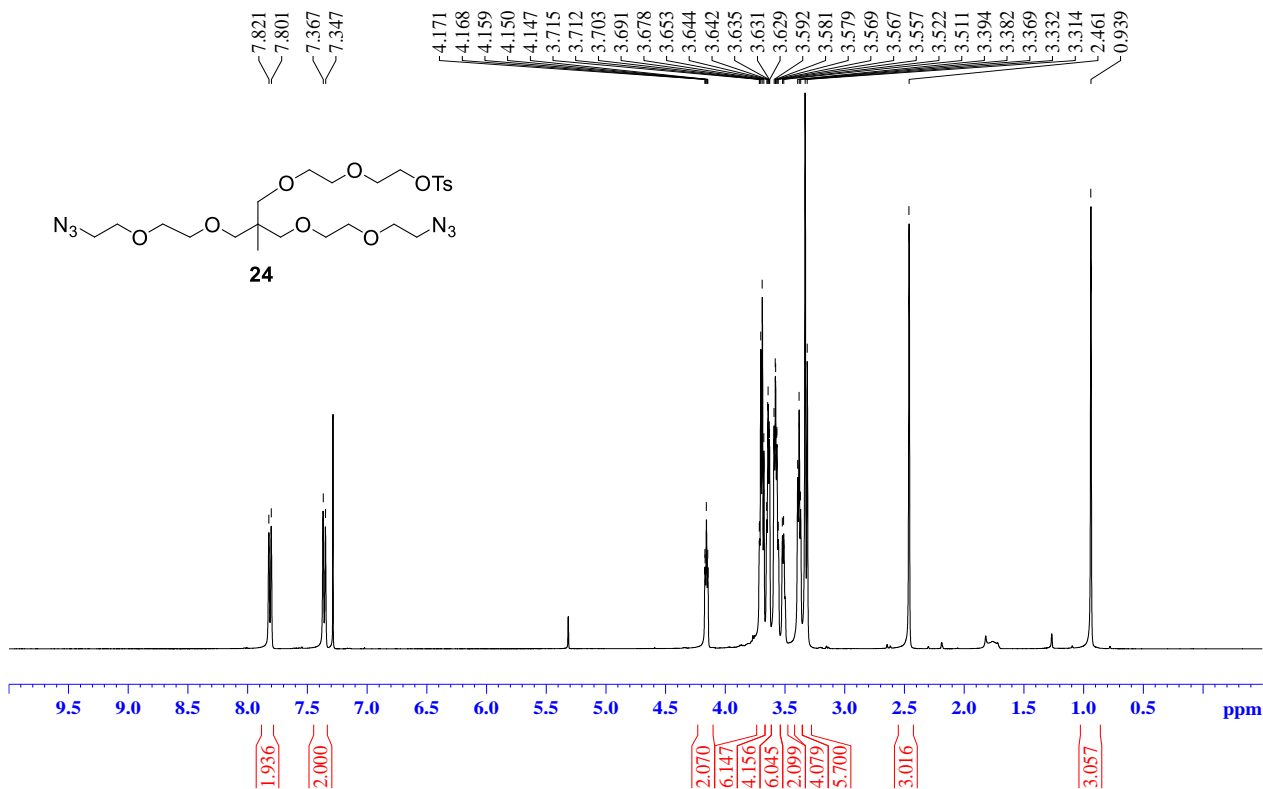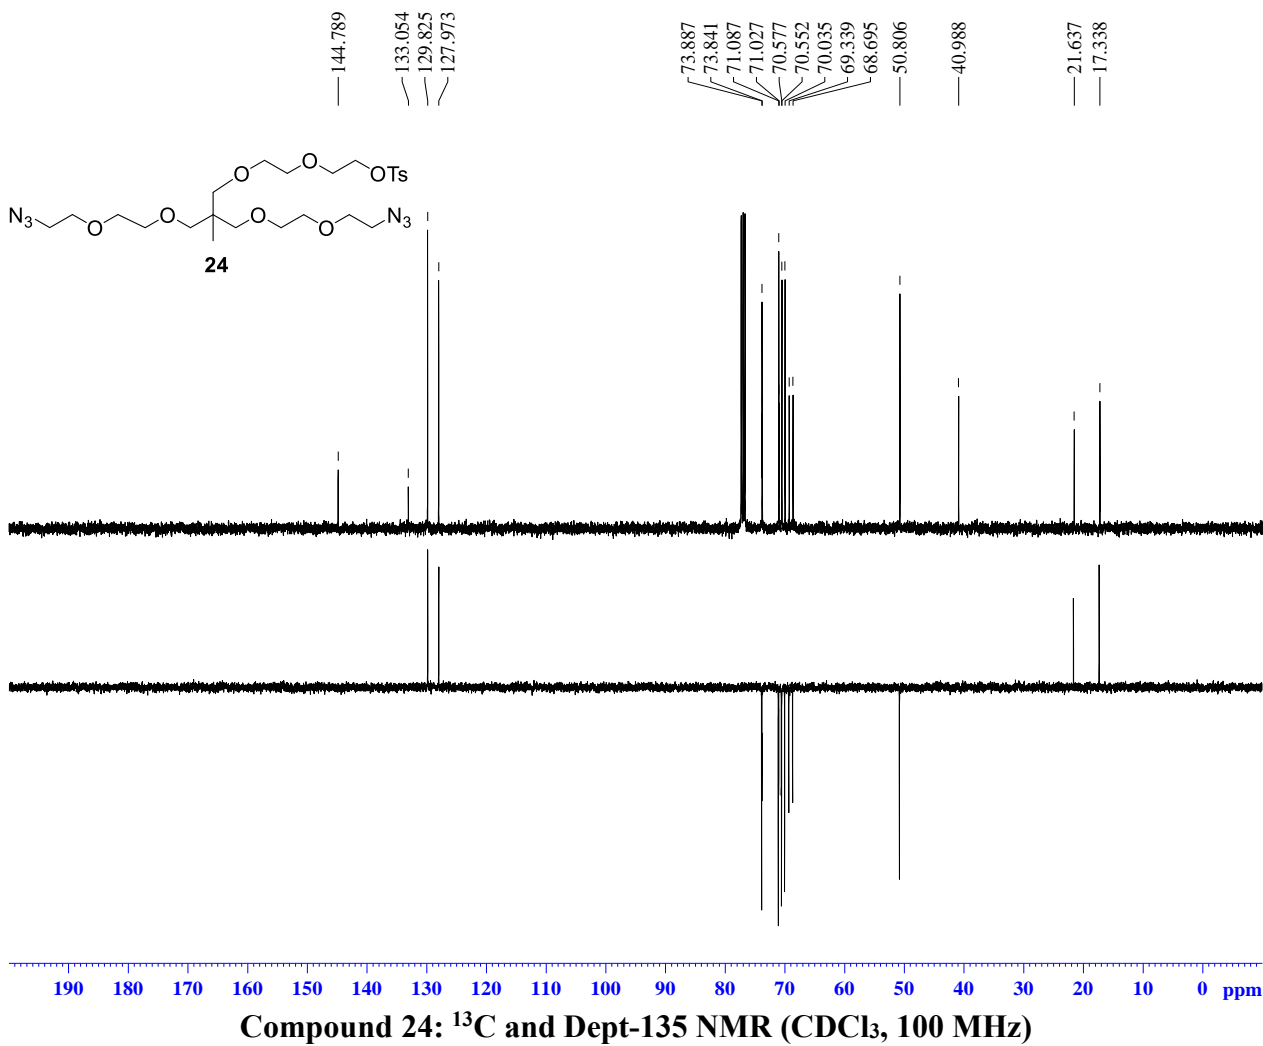

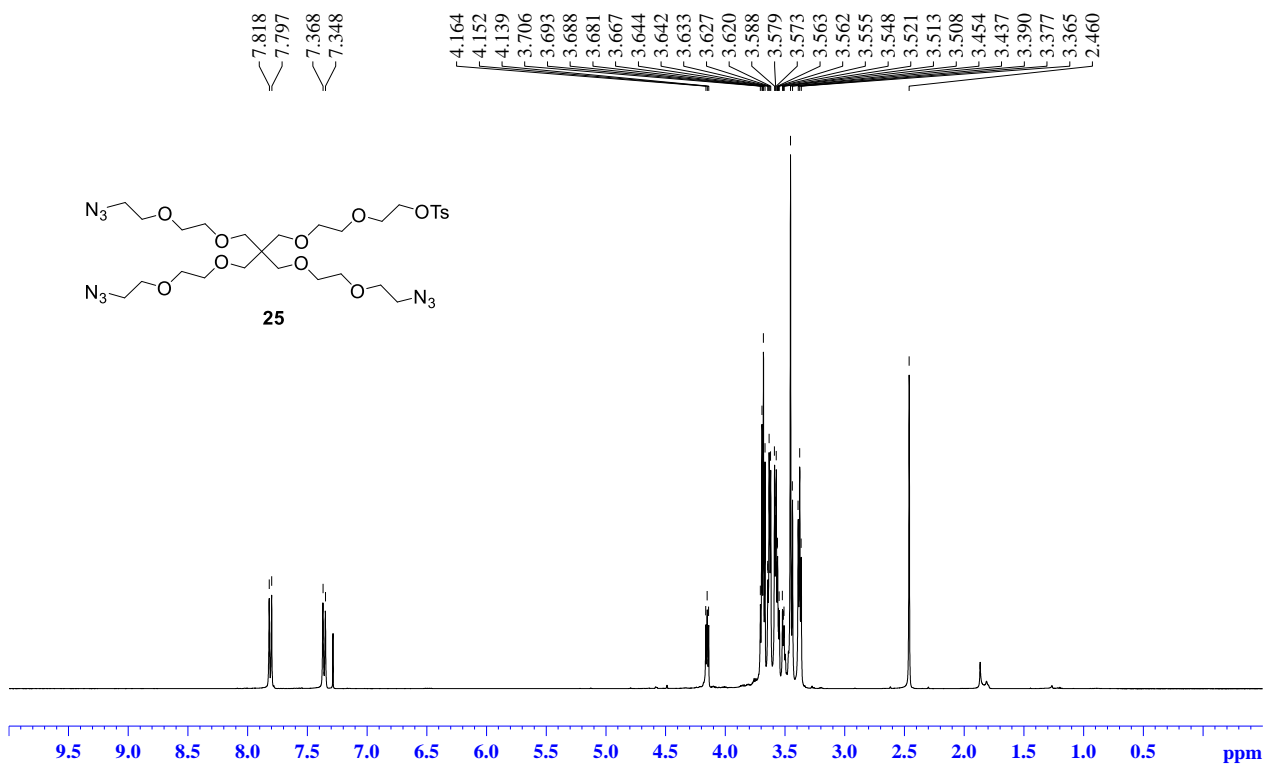

**Compound 25:  $^1\text{H}$  NMR ( $\text{CDCl}_3$ , 400 MHz)**

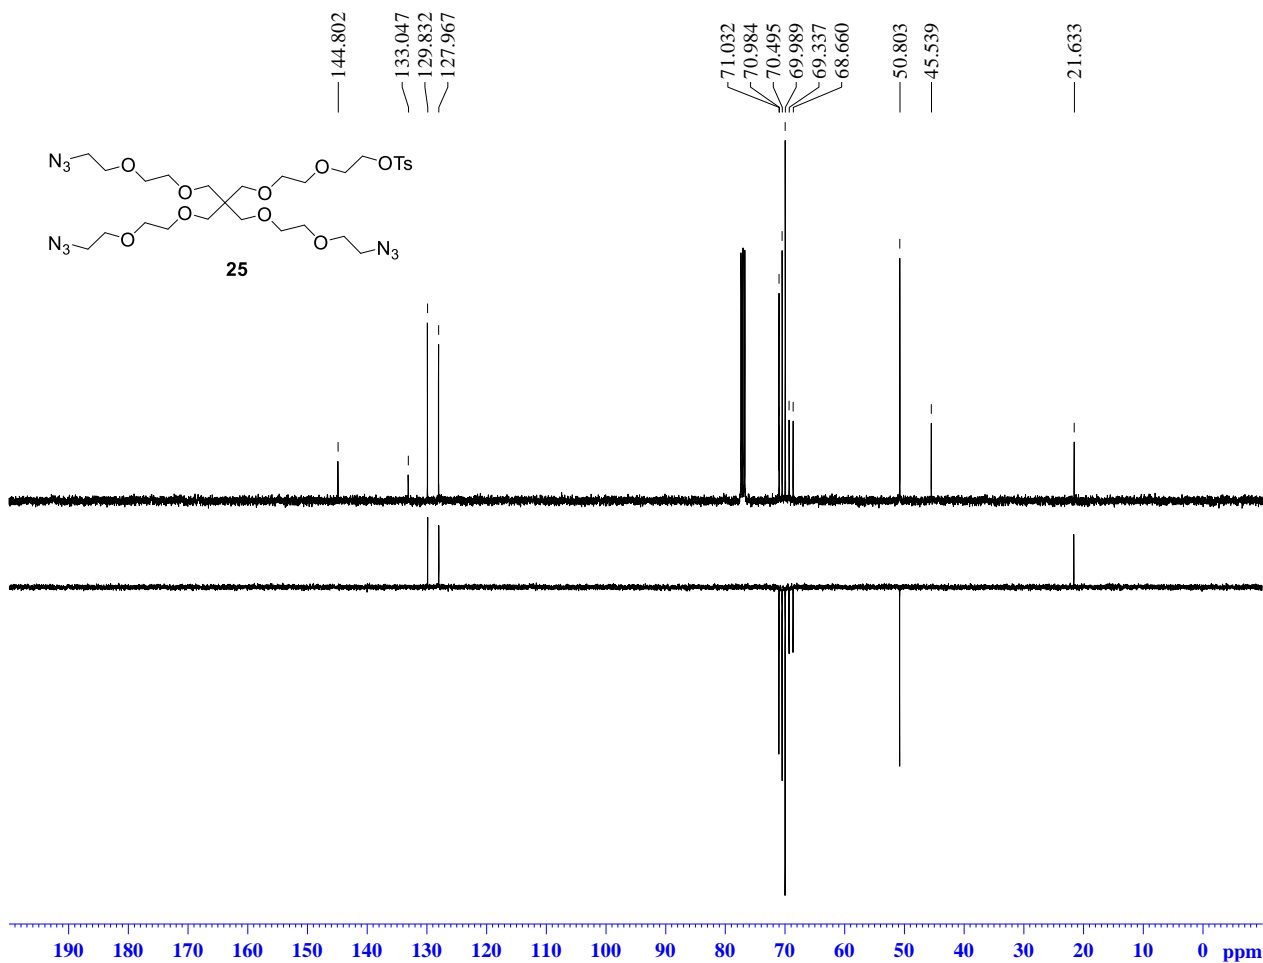

**Compound 25:  $^{13}\text{C}$  and Dept- $^{135}\text{C}$  NMR ( $\text{CDCl}_3$ , 100 MHz)**

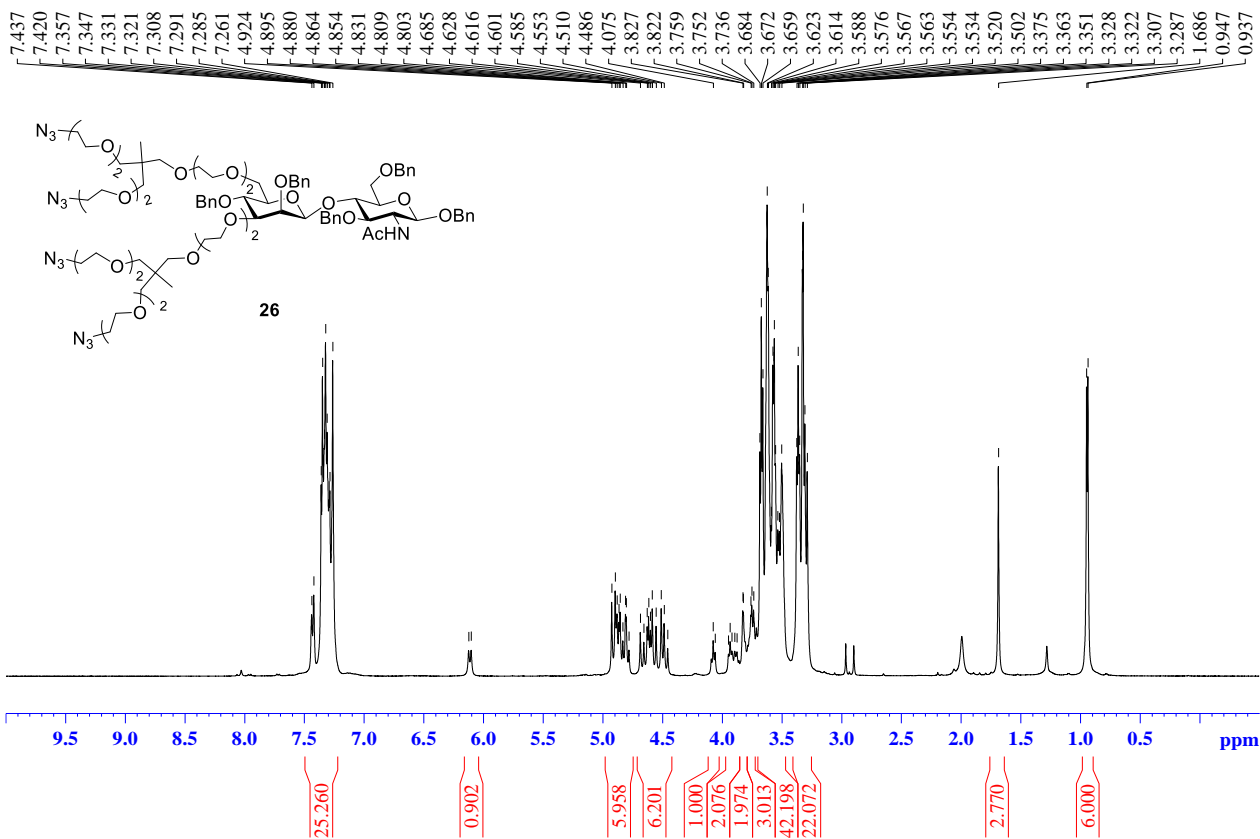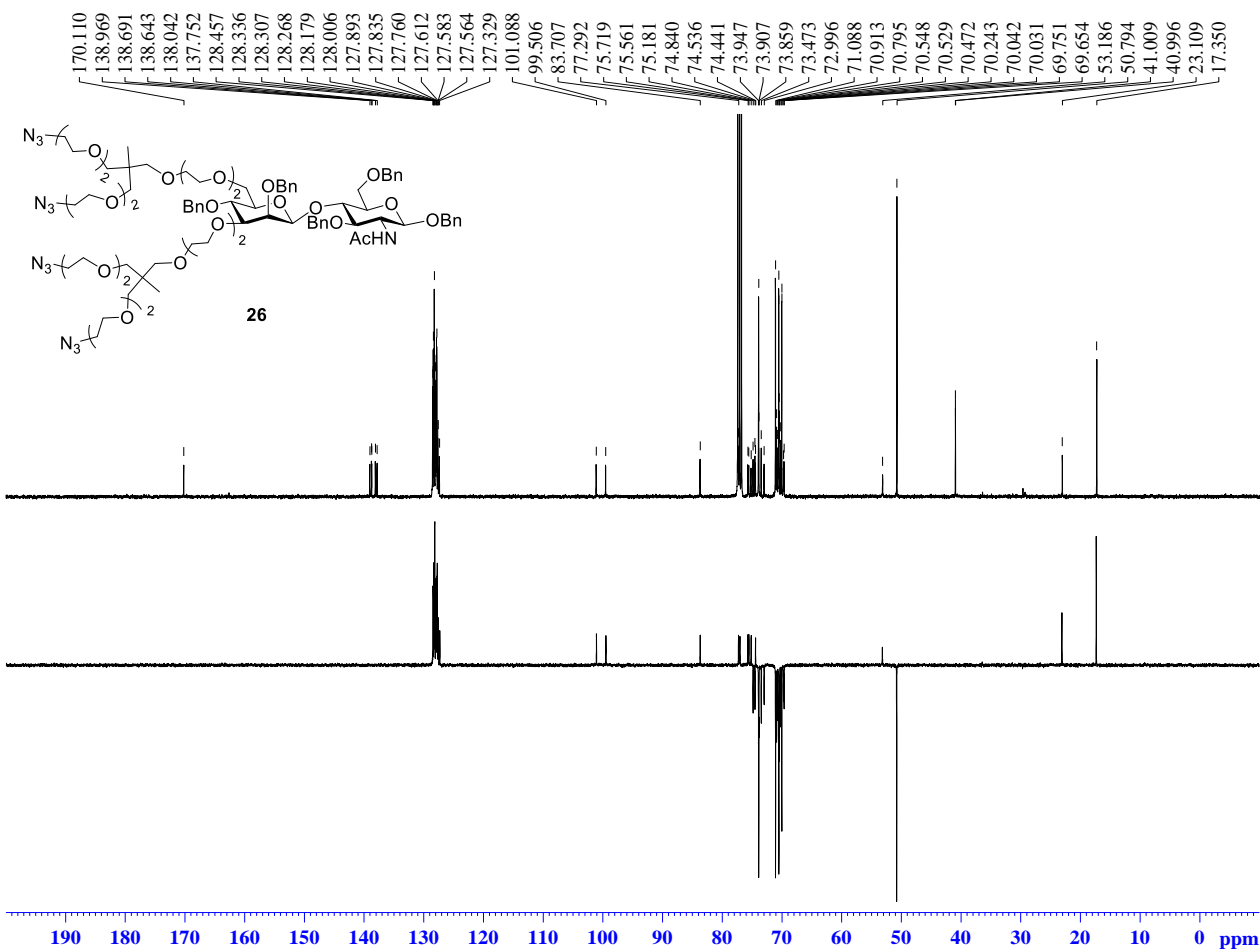

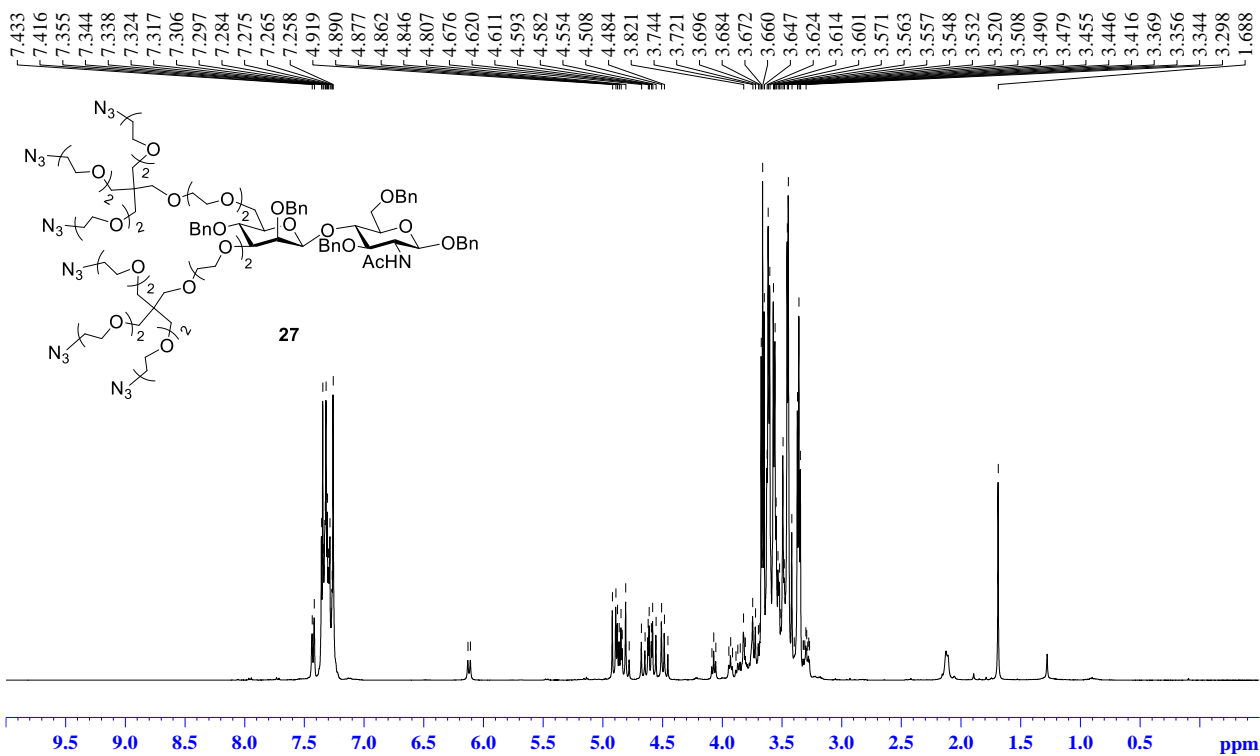

Compound 27: <sup>1</sup>H NMR (CDCl<sub>3</sub>, 400 MHz)

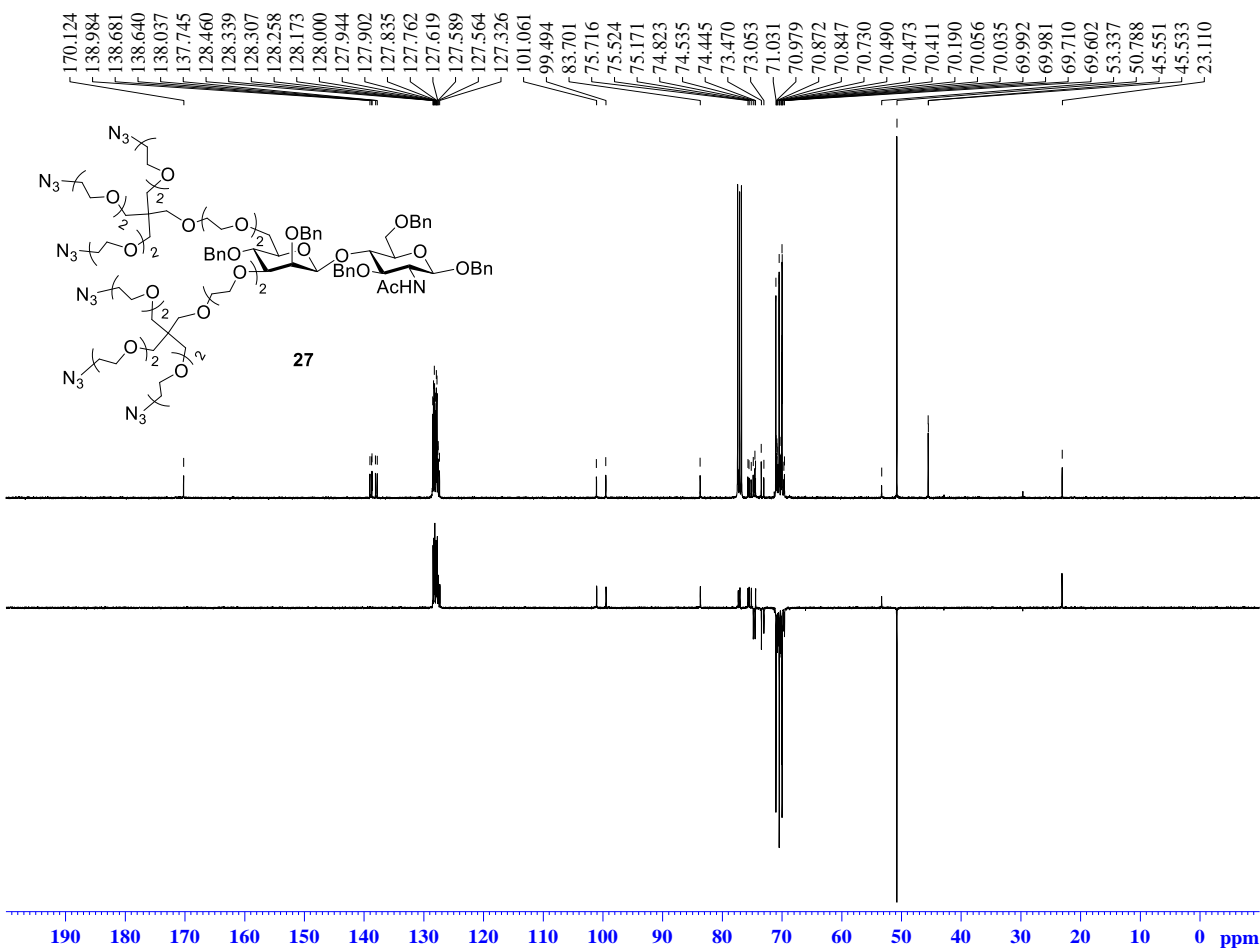

Compound 27: <sup>13</sup>C and Dept-135 NMR (CDCl<sub>3</sub>, 100 MHz)

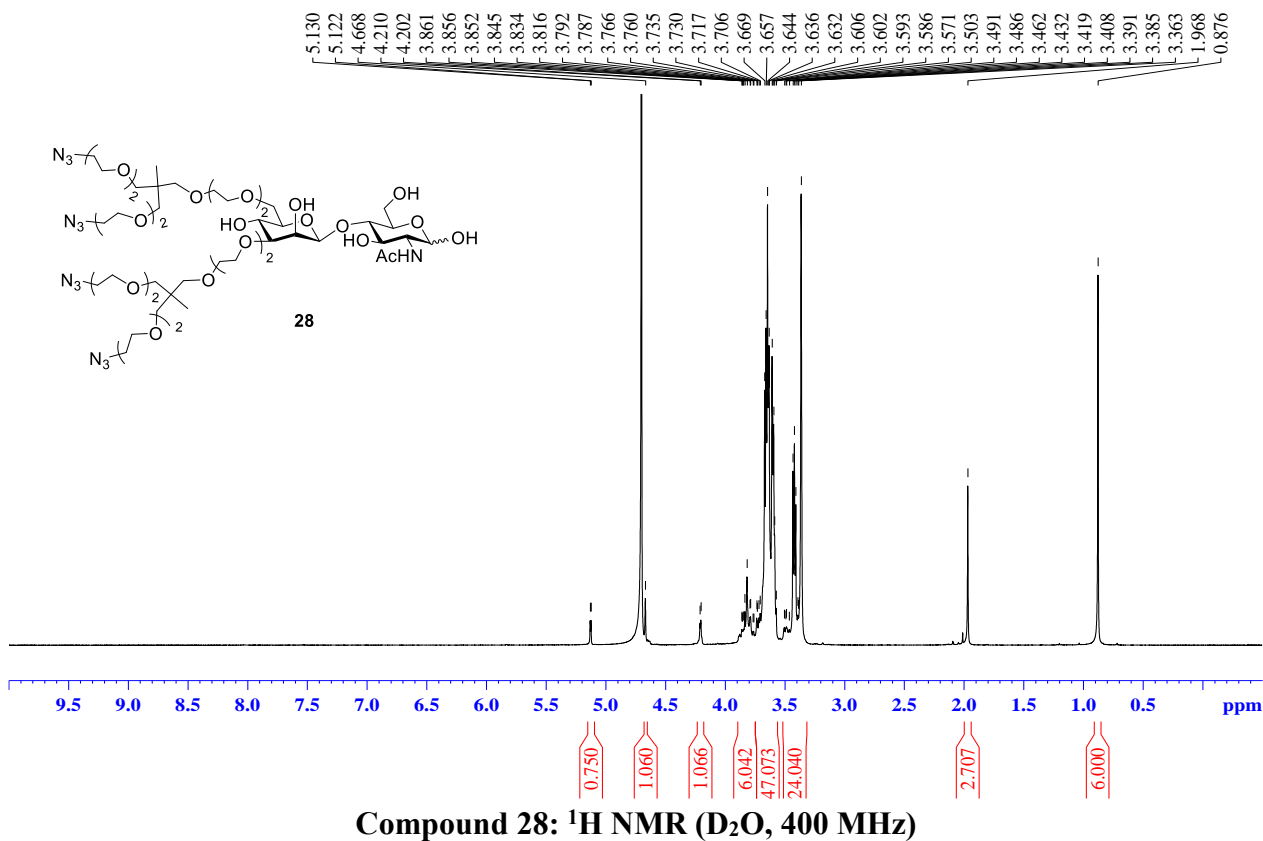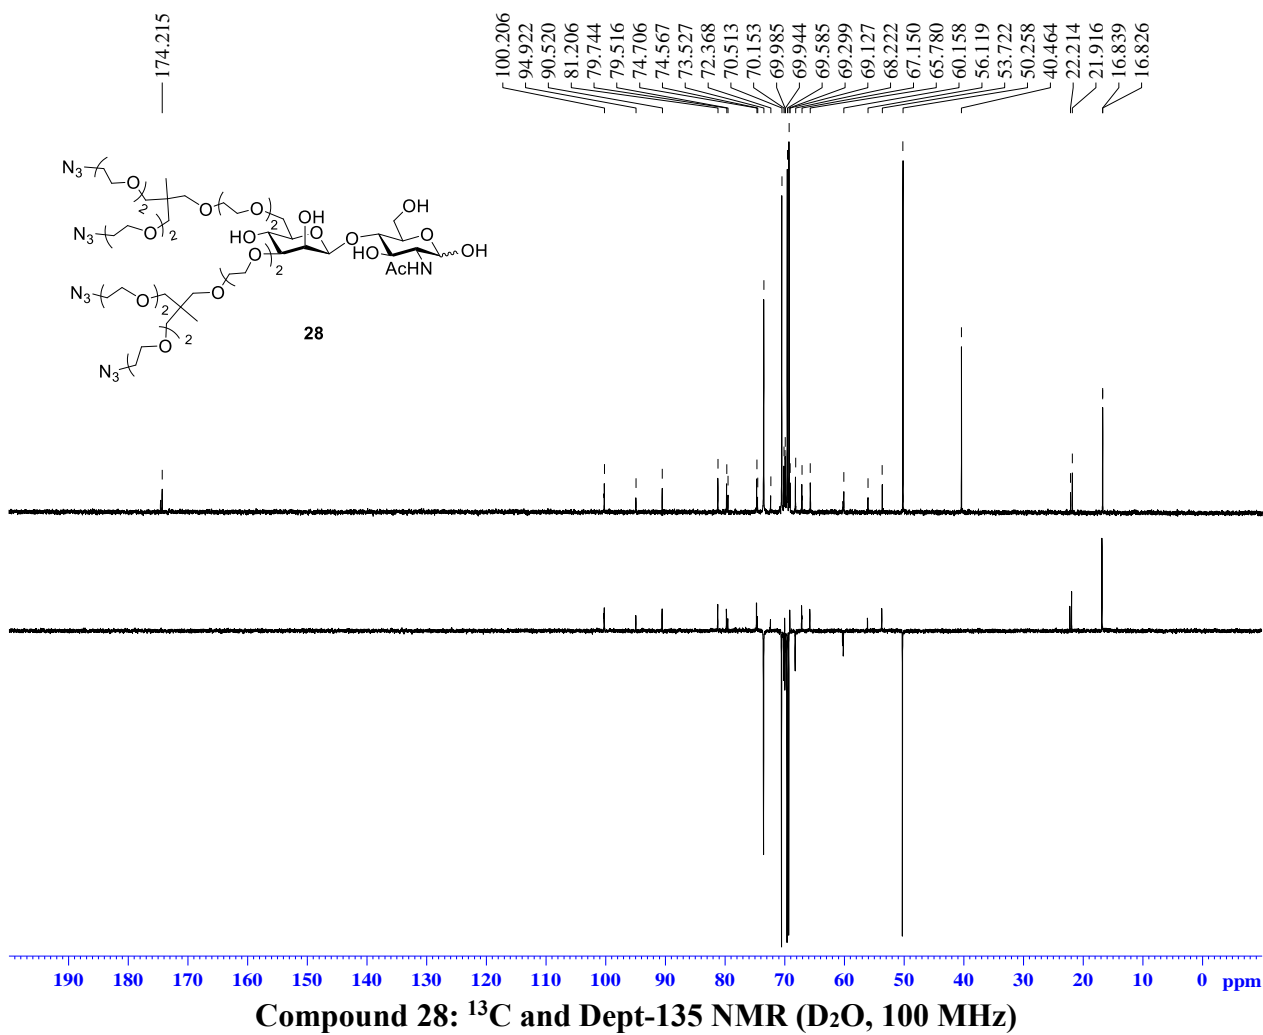

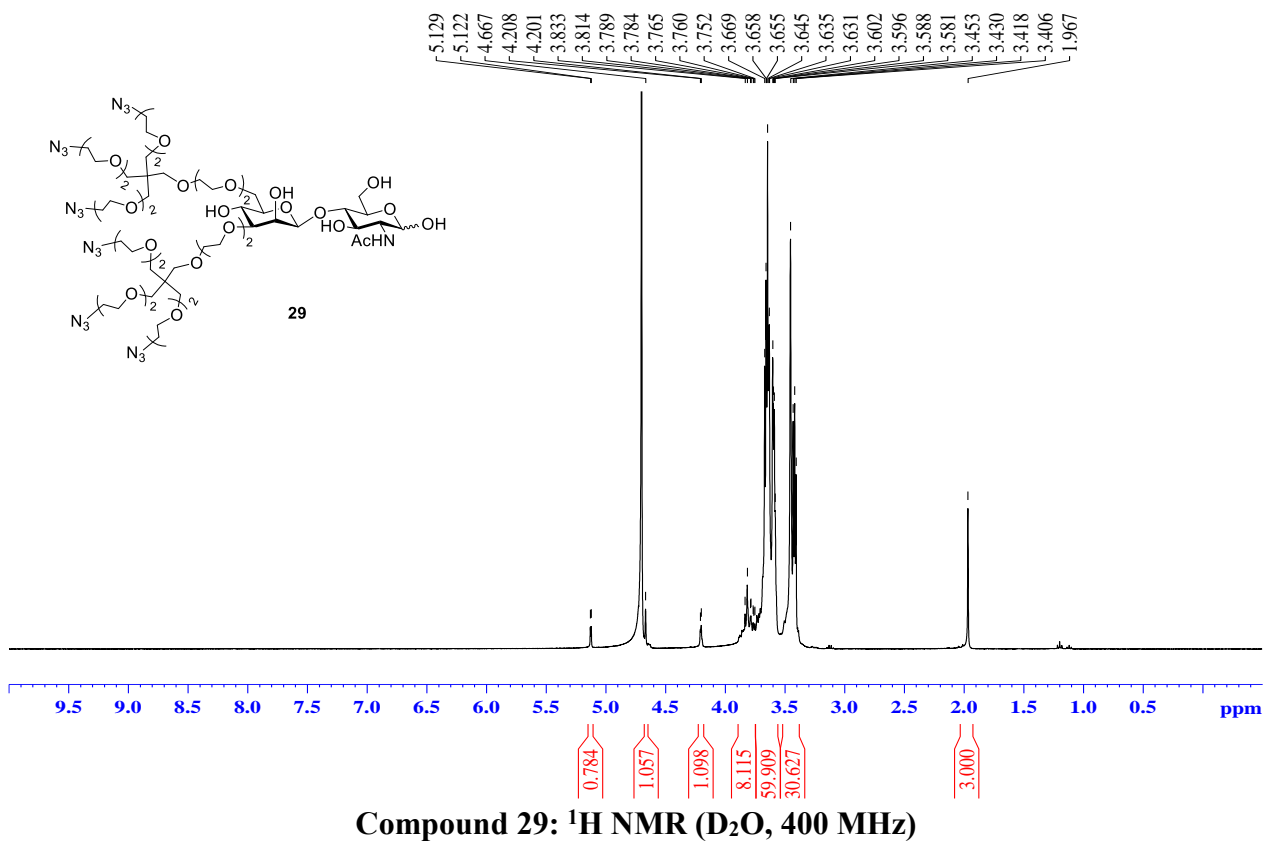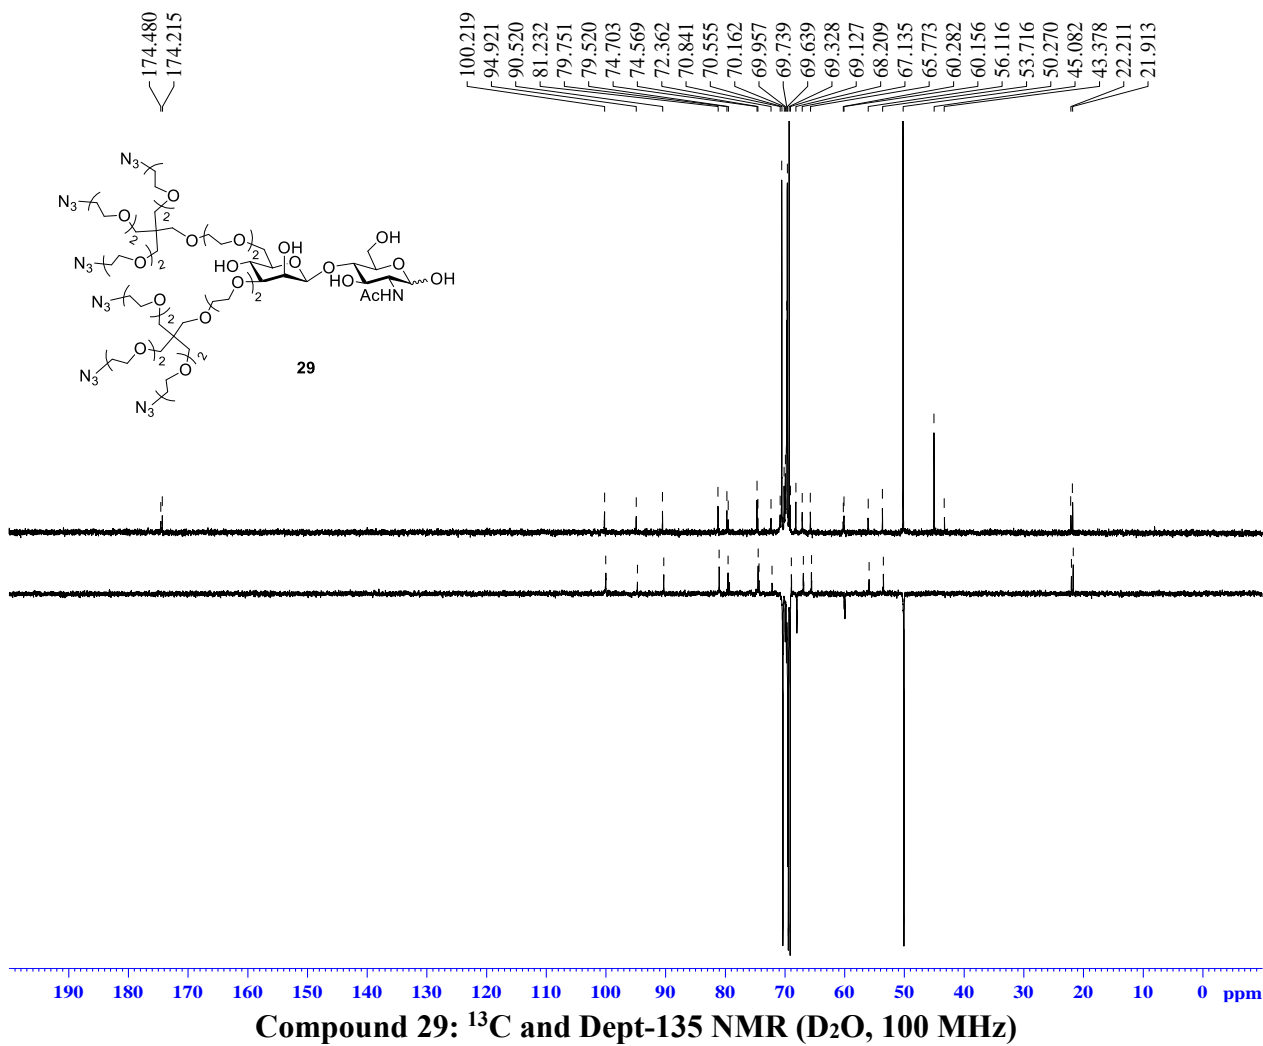

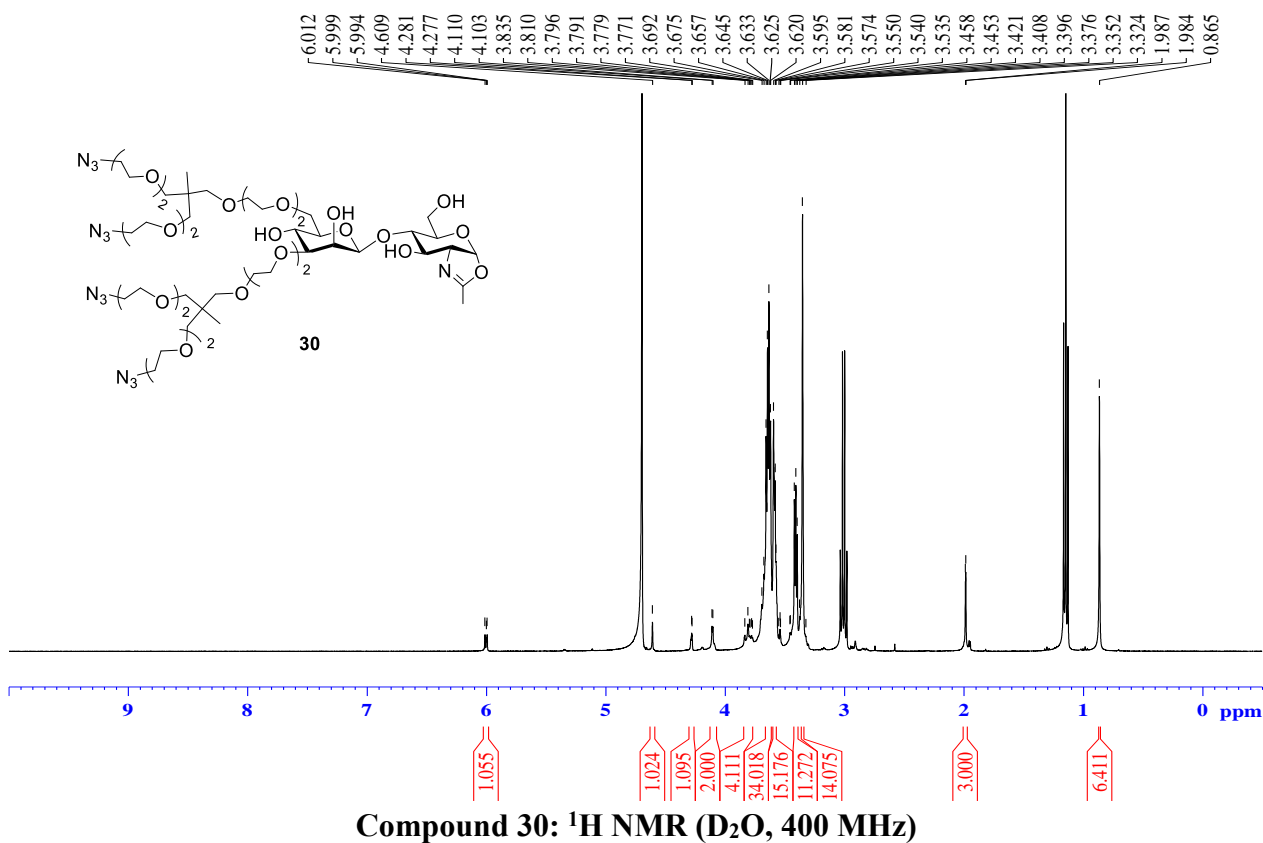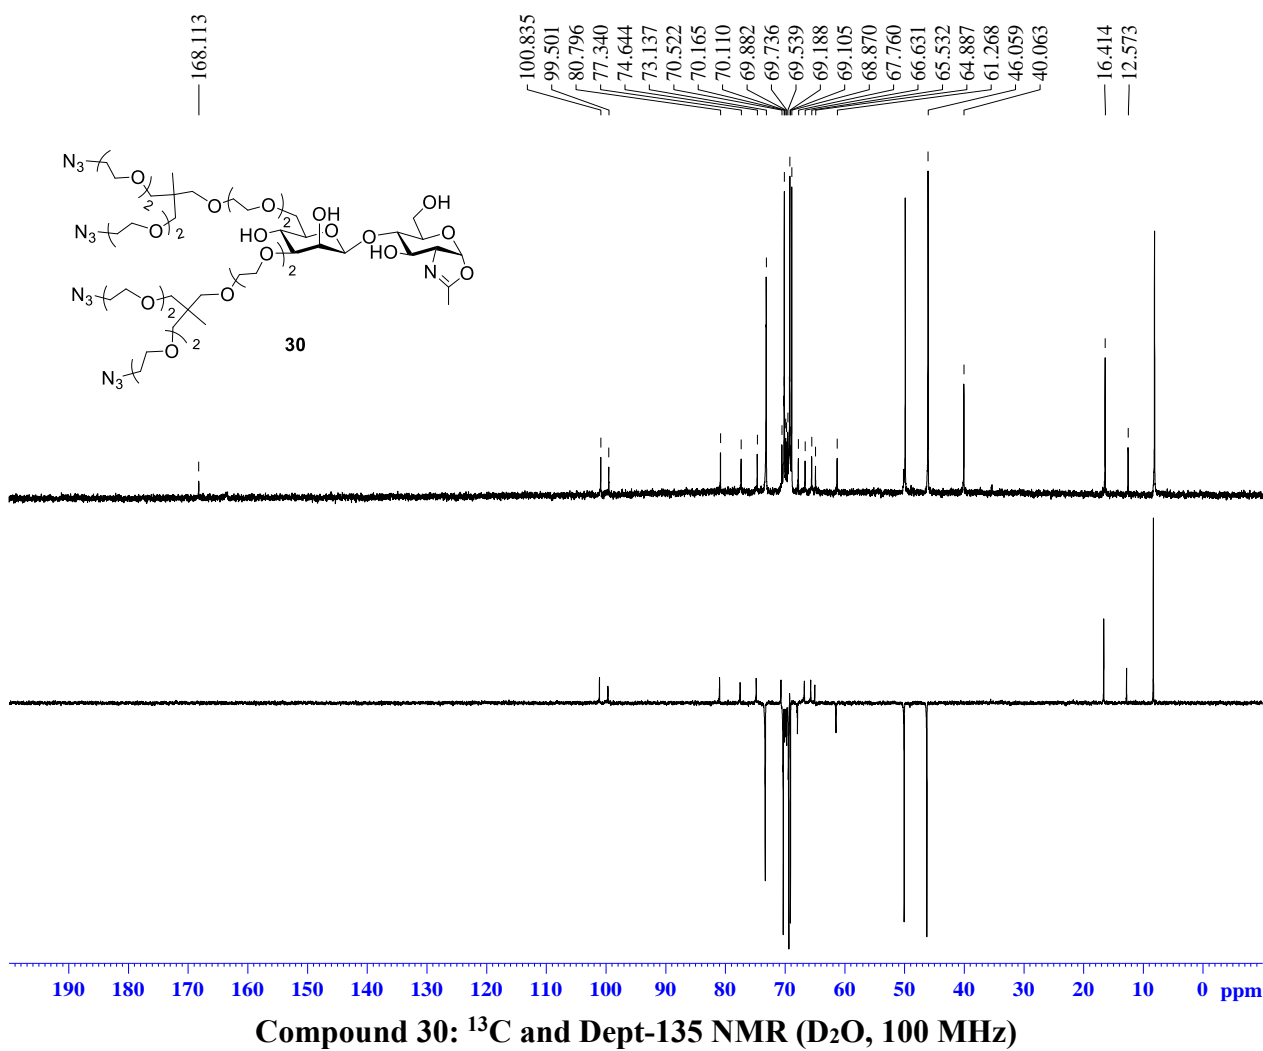

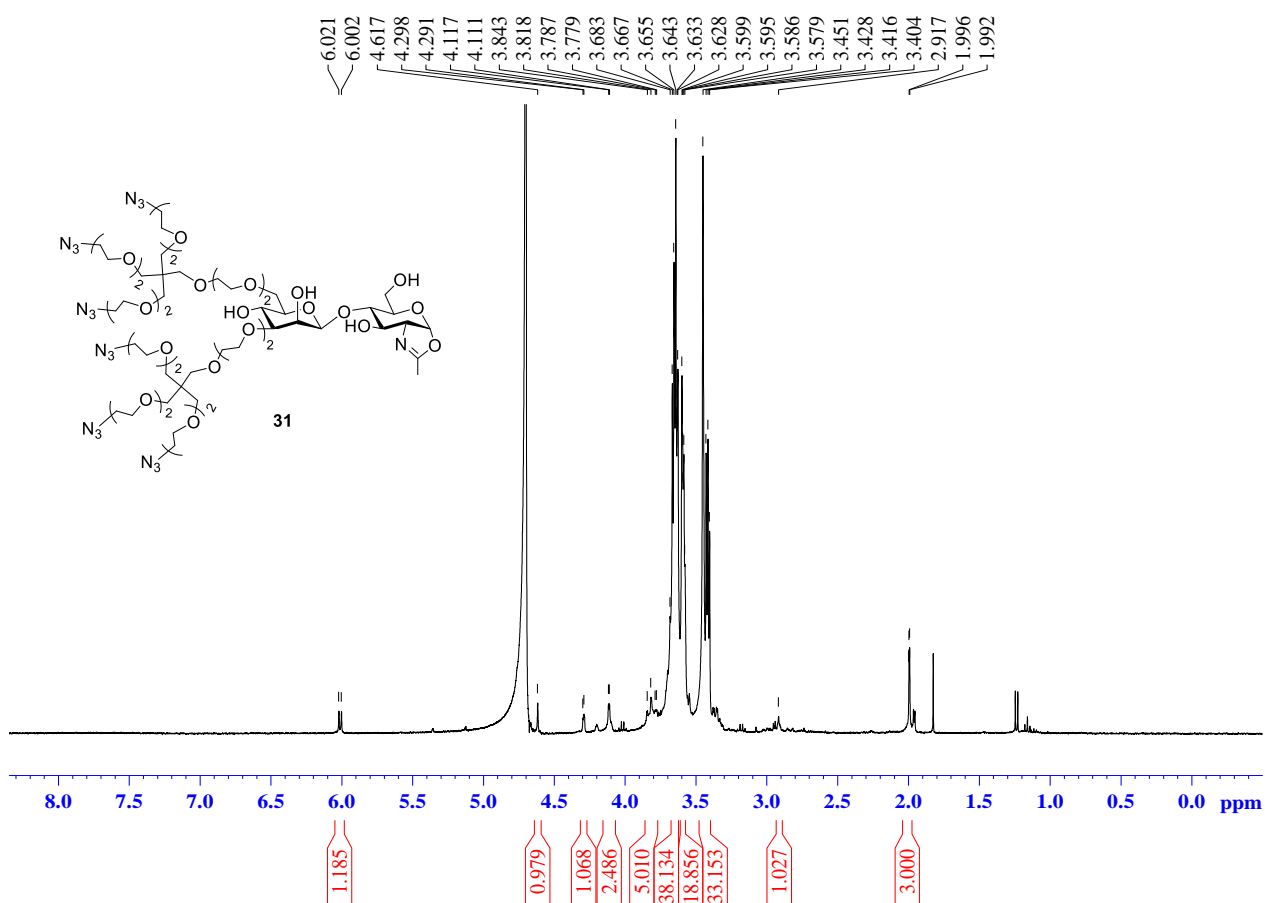

Compound 31:  $^1\text{H}$  NMR (D<sub>2</sub>O, 400 MHz)

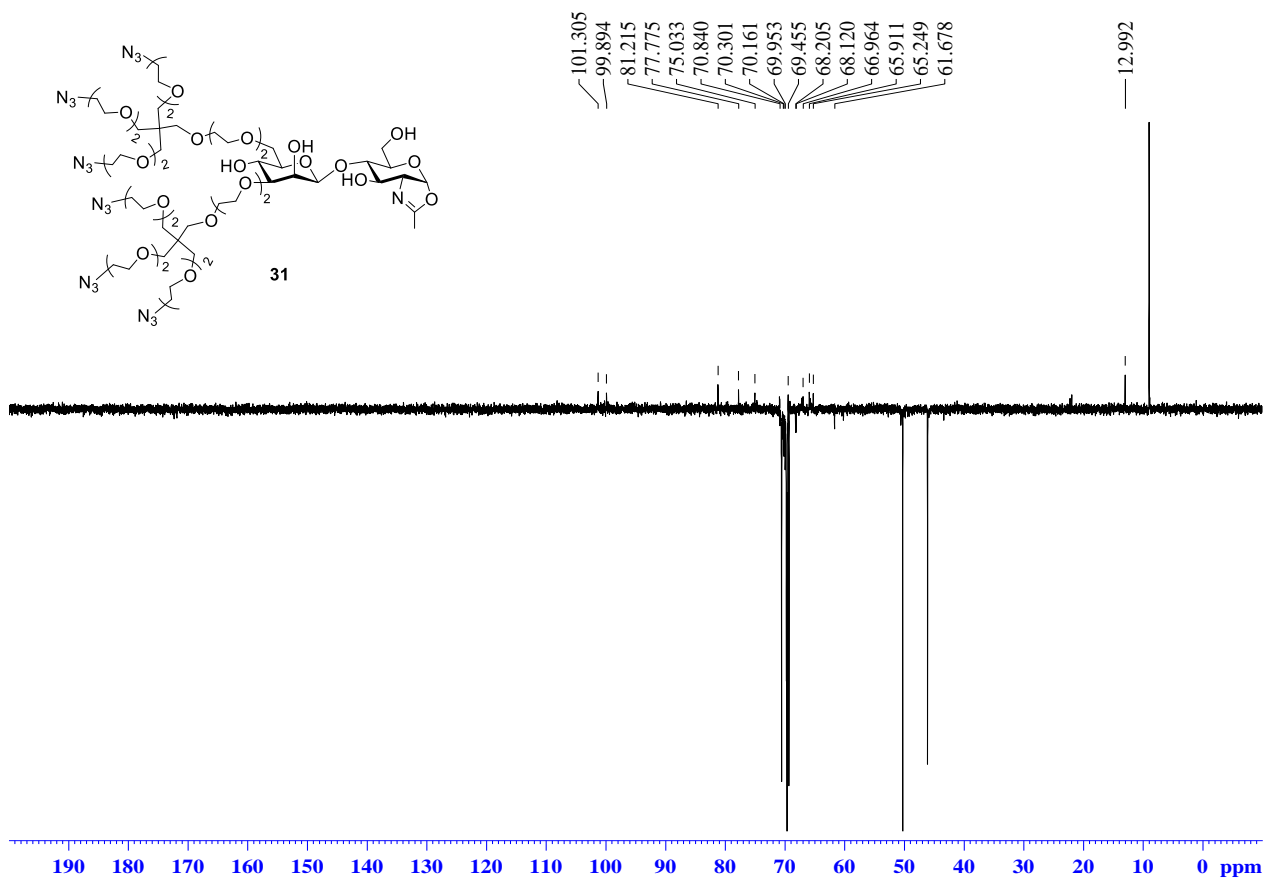

Compound 31: Dept-135 NMR (D<sub>2</sub>O, 100 MHz)
